# Supplementary material for: Human metabolic responses to microgravity simulated in a 45-day 6° head-down tilt bed rest (HDBR) experiment
Source: Royal Society of Chemistry journal article supplement (doi:10.1039/c6ay00644b), 2016-01-01
Supplement: c6ay00644b1.pdf [file c6ay00644b1.pdf]

# Supporting Information

## Human Metabolic Responses to Microgravity Simulated in a 45-Day 6°

### Head-Down Tilt Bed Rest (HDBR) Experiment

Pu Chen<sup>1</sup>, Yanbo Yu<sup>1</sup>, Chen Tan<sup>2</sup>, Hongju Liu<sup>2</sup>, Feng Wu<sup>2</sup>, Hongyi Li<sup>1</sup>, Jianying Huang<sup>1</sup>, Haisheng Dong<sup>1</sup>, Yumin Wan, Xiaoping Chen<sup>2\*</sup>, Bin Chen<sup>1\*</sup>

<sup>1</sup>Key Laboratory of Space Nutrition and Food Engineering, China Astronaut Research and Training Centre, No. 26, Beijing Road, Beijing 100094, China

<sup>2</sup>State Key Lab of Space Medicine Fundamentals and Application, China Astronaut Research and Training Center, No. 26, Beiqing road, Beijing 100094, China;

\*Corresponding authors

Bin Chen, E-mail address: chenb12@aliyun.com; Xiaoping Chen, E-mail address:

xpchen2009@163.com.

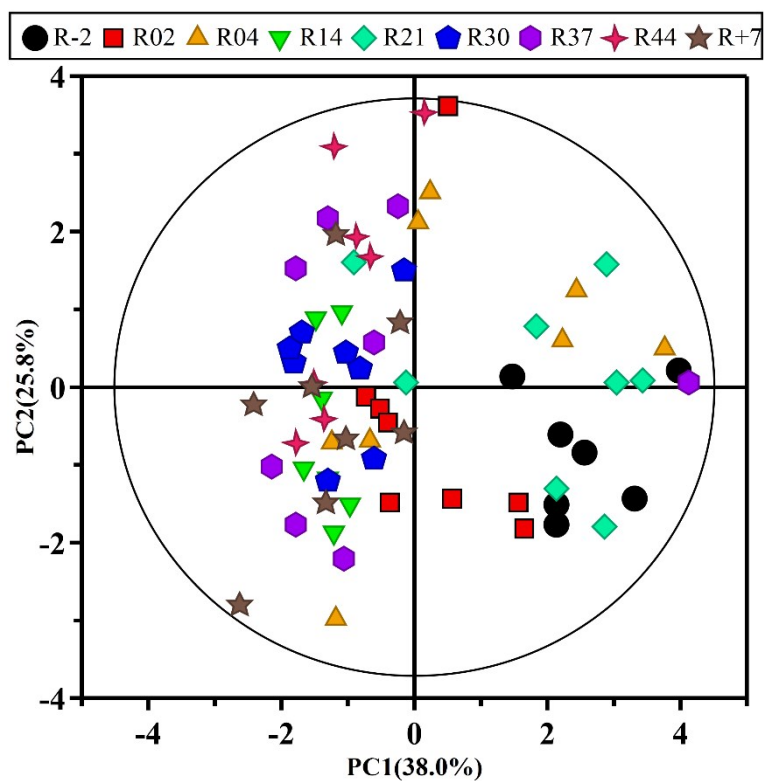

$$R^2X=92.1\%, Q^2=0.625$$

**Figure S1.** PCA score plot of urinary  $^1\text{H}$  NMR spectral data derived from subjects of 45-day,  $-6^\circ$  head-down bed rest. R-2 refers to the day of 2 days before HDBR, R02, R04, R14, R21, R30, R37, R44, and R+7 represented that spectral data of urine specimens was collected on the 2nd, 4th, ..., and 44th days of bed rest respectively, and R+7 refers to the samples collected on the seven day after HDBR.

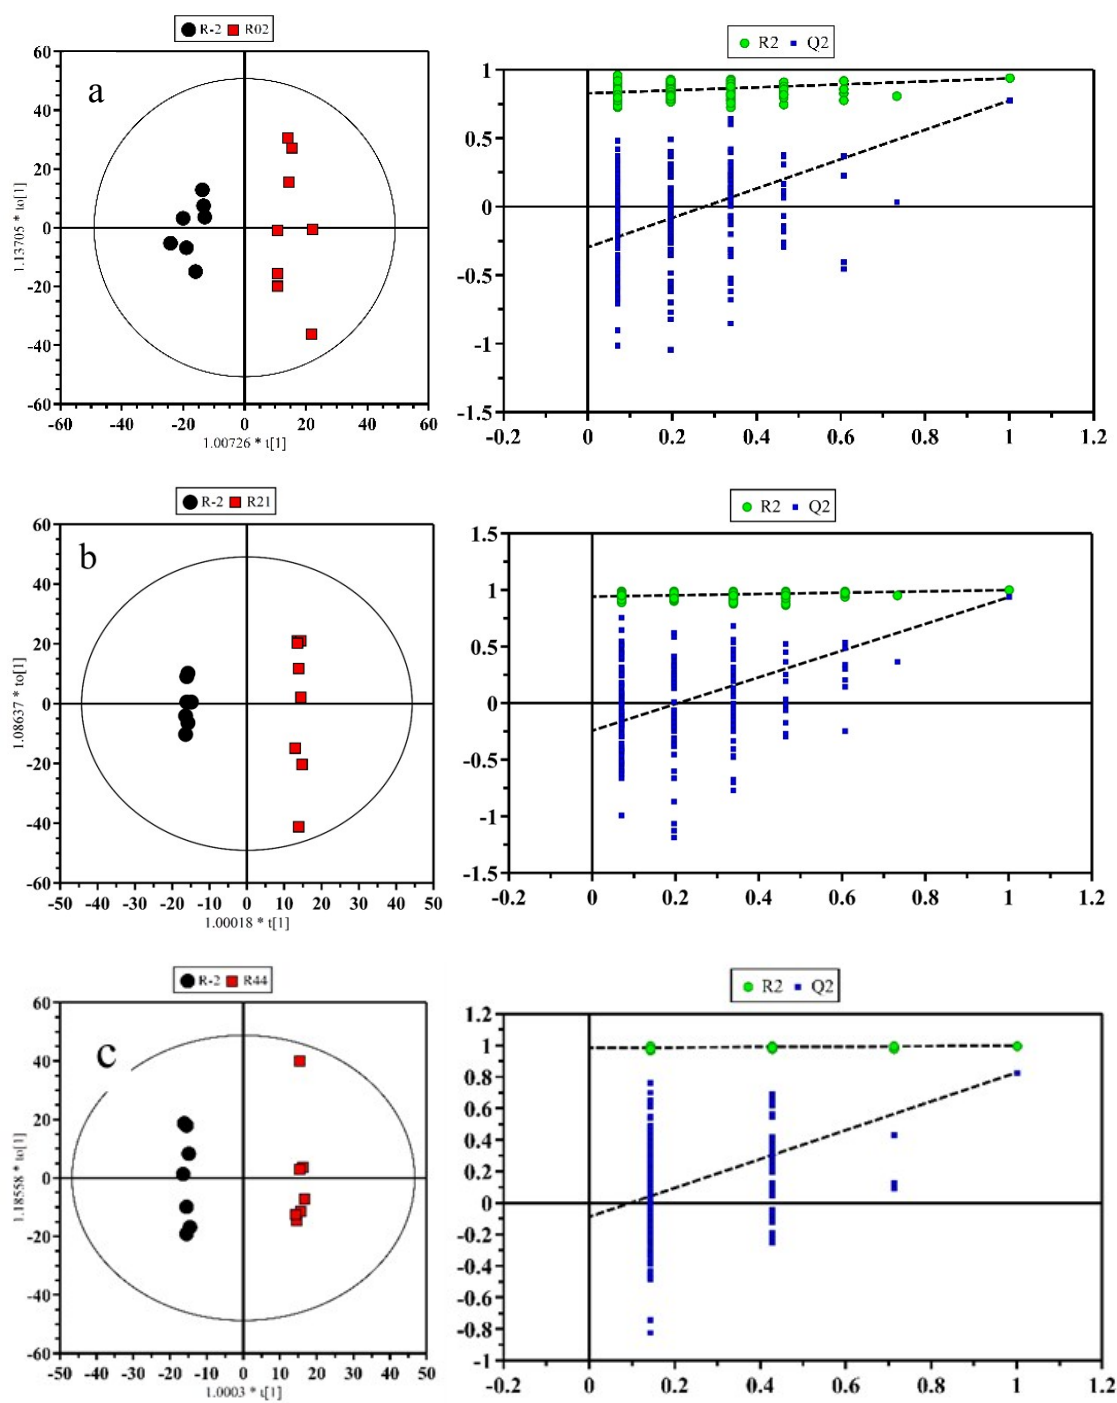

**Figure S2.** O2PLS-DA score plot of urinary  $^1\text{H}$  NMR spectral data derived from subjects of 45-day,  $-6^\circ$  head-down bed rest and results of permutation test with 200 iteration. The model is built for comparing R02 (a), R04 (b), and R44 (c) with R-2.

**Table S1. Summary of the Differences in Metabolites Between Two Time Points**

| Metabolites          | Chemical shift <sup>b</sup><br>$\delta$ /ppm | $r^a$                                                                         |                                                                               |                                                                               |
|----------------------|----------------------------------------------|-------------------------------------------------------------------------------|-------------------------------------------------------------------------------|-------------------------------------------------------------------------------|
|                      |                                              | R <sup>2</sup> X=41.1%<br>R <sup>2</sup> Y=0.936<br>$Q^2=0.775$<br>$p=0.0028$ | R <sup>2</sup> X=48.3%<br>R <sup>2</sup> Y=0.999<br>$Q^2=0.935$<br>$p=0.0002$ | R <sup>2</sup> X=55.6%<br>R <sup>2</sup> Y=0.998<br>$Q^2=0.827$<br>$p=0.0199$ |
|                      |                                              | R02 vs. R-2                                                                   | R21 vs. R-2                                                                   | R44 vs. R-2                                                                   |
| Valine               | 1.03(d)                                      | 0.881                                                                         | -                                                                             | -                                                                             |
| 2-Hydroxyisobutyrate | 1.36(s)                                      | -                                                                             | -                                                                             | 0.825                                                                         |
| 2-Hydroxybutyrate    | 1.80(m)                                      | -                                                                             | -                                                                             | 0.868                                                                         |
| HMB                  | 1.27(s)                                      | -0.642                                                                        | -                                                                             | -                                                                             |
| Proline              | 2.04(m)                                      | 0.808                                                                         | -                                                                             | -                                                                             |
| Glutamine            | 2.12(m)                                      | 0.775                                                                         | -                                                                             | 0.883                                                                         |
| 5-Aminolevulinate    | 2.78(t)                                      | 0.781                                                                         | -                                                                             | 0.837                                                                         |
| N,N-Dimethylglycine  | 2.92(s)                                      | 0.828                                                                         | 0.794                                                                         | -                                                                             |
| Taurine              | 3.43(t)                                      | 0.718                                                                         | 0.818                                                                         | 0.823                                                                         |
| Glycine              | 3.57(s)                                      | 0.659                                                                         | -                                                                             | 0.838                                                                         |
| GPC                  | 3.22(s)                                      | -0.881                                                                        | -                                                                             | -0.894                                                                        |
| Betaine              | 3.25(s)                                      | -                                                                             | -                                                                             | -0.866                                                                        |
| Threonate            | 3.68(m)                                      | -0.961                                                                        | -0.959                                                                        | -0.955                                                                        |
| Isoleucine           | 3.66(d)                                      | -                                                                             | -                                                                             | 0.798                                                                         |
| Mannitol             | 3.84(m)                                      | -0.942                                                                        | -0.956                                                                        | -0.955                                                                        |
| Creatinine           | 3.05(s)                                      | 0.651                                                                         | -                                                                             | 0.820                                                                         |
| Creatine             | 3.92(s)                                      | 0.768                                                                         | -                                                                             | -                                                                             |
| O-Phosphoserine      | 4.16(m)                                      | -                                                                             | -                                                                             | 0.913                                                                         |
| Serotonin            | 6.85(d)                                      | 0.910                                                                         | -                                                                             | 0.883                                                                         |
| <i>m</i> -HPA        | 6.88(dd)                                     | 0.857                                                                         | -                                                                             | -                                                                             |
| PAG                  | 7.43(d)                                      | 0.822                                                                         | -                                                                             | -                                                                             |
| Glutamate            | 2.10(m)                                      | 0.867                                                                         | -                                                                             | 0.926                                                                         |
| dTTP                 | 7.67(s)                                      | 0.857                                                                         | -                                                                             | -                                                                             |
| NMN                  | 8.20(d)                                      | 0.815                                                                         | -                                                                             | 0.705                                                                         |
| Guanidoacetate       | 3.80(s)                                      | 0.900                                                                         | -0.888                                                                        | -0.880                                                                        |
| Isobutyrate          | 1.10(d)                                      | -                                                                             | 0.878                                                                         | -                                                                             |
| Lactate              | 1.33(d)                                      | -                                                                             | -0.881                                                                        | -                                                                             |
| Methylguanidine      | 2.81(s)                                      | -                                                                             | 0.882                                                                         | -                                                                             |

<sup>a</sup>Correlation coefficients, with positive and negative signs indicating positive and negative correlations of the concentrations. A correlation coefficient of  $|r| > 0.600$  was used as the cutoff value for statistical significance based on discrimination significance at the level of  $p=0.05$ . “-”, correlation coefficient  $|r|$  of less than 0.600. <sup>b</sup>Multiplicity: s, singlet; d, doublet; t, triplet; q, quartet; dd, doublet of doublets; m, multiplet. Abbreviations: HMB,  $\beta$ -hydroxy- $\beta$ -methylbutyrate; GPC,

glycerophosphorylcholine; *m*-HPA, *m*-hydroxyphenylacetate; PAG, phenylacetylglycine; NMN, N-methylnicotinamide

**Table S2. One-way ANOVA Analysis of Metabolites Screened from 45-Days HDBR**

| Factors | (I) Group | (J) Group | Deviation | SD       | <i>p</i> | 95% CI   |          |        |
|---------|-----------|-----------|-----------|----------|----------|----------|----------|--------|
|         |           |           |           |          |          | min      | max      |        |
| TMAO    | LSD       | 1         | 2         | 2.212*   | 0.566    | 2.42E-04 | 1.079    | 3.345  |
|         |           |           | 3         | 1.661*   | 0.566    | 4.75E-03 | 0.528    | 2.794  |
|         |           |           | 4         | 2.878*   | 0.585    | 7.08E-06 | 1.708    | 4.049  |
|         |           |           | 5         | 0.142    | 0.566    | 8.03E-01 | -0.991   | 1.275  |
|         |           |           | 6         | 2.783*   | 0.566    | 7.28E-06 | 1.65     | 3.916  |
|         |           |           | 7         | 2.132*   | 0.566    | 3.84E-04 | 0.999    | 3.265  |
|         |           |           | 8         | 2.904*   | 0.585    | 6.05E-06 | 1.733    | 4.074  |
|         |           |           | 9         | 2.866*   | 0.566    | 4.25E-06 | 1.733    | 3.999  |
|         |           |           | 2         | 1        | -2.212*  | 0.566    | 2.42E-04 | -3.345 |
|         |           | 3         |           | -0.551   | 0.547    | 3.18E-01 | -1.645   | 0.544  |
|         |           | 4         |           | 0.667    | 0.566    | 2.44E-01 | -0.467   | 1.8    |
|         |           | 5         |           | -2.070*  | 0.547    | 3.60E-04 | -3.165   | -0.975 |
|         |           | 6         |           | 0.571    | 0.547    | 3.01E-01 | -0.524   | 1.665  |
|         |           | 7         |           | -0.08    | 0.547    | 8.84E-01 | -1.175   | 1.014  |
|         |           | 8         |           | 0.692    | 0.566    | 2.27E-01 | -0.441   | 1.825  |
|         |           | 9         |           | 0.654    | 0.547    | 2.37E-01 | -0.44    | 1.749  |
|         |           | 3         |           | 1        | -1.661*  | 0.566    | 4.75E-03 | -2.794 |
|         |           |           | 2         | 0.551    | 0.547    | 3.18E-01 | -0.544   | 1.645  |
|         |           |           | 4         | 1.217*   | 0.566    | 3.57E-02 | 0.084    | 2.35   |
|         |           |           | 5         | -1.519*  | 0.547    | 7.32E-03 | -2.614   | -0.425 |
| 6       | 1.121*    |           | 0.547     | 4.48E-02 | 0.027    | 2.216    |          |        |
| 7       | 0.47      |           | 0.547     | 3.94E-01 | -0.624   | 1.565    |          |        |
| 8       | 1.242*    |           | 0.566     | 3.22E-02 | 0.109    | 2.376    |          |        |
| 9       | 1.205*    |           | 0.547     | 3.15E-02 | 0.11     | 2.3      |          |        |
| 4       | 1         |           | -2.878*   | 0.585    | 7.08E-06 | -4.049   | -1.708   |        |
|         | 2         | -0.667    | 0.566     | 2.44E-01 | -1.8     | 0.467    |          |        |
|         | 3         | -1.217*   | 0.566     | 3.57E-02 | -2.35    | -0.084   |          |        |
|         | 5         | -2.737*   | 0.566     | 9.77E-06 | -3.87    | -1.604   |          |        |
|         | 6         | -0.096    | 0.566     | 8.66E-01 | -1.229   | 1.037    |          |        |
|         | 7         | -0.747    | 0.566     | 1.92E-01 | -1.88    | 0.386    |          |        |
|         | 8         | 0.025     | 0.585     | 9.66E-01 | -1.145   | 1.196    |          |        |
|         | 9         | -0.012    | 0.566     | 9.83E-01 | -1.145   | 1.121    |          |        |
|         | 5         | 1         | -0.142    | 0.566    | 8.03E-01 | -1.275   | 0.991    |        |
| 2       |           | 2.070*    | 0.547     | 3.60E-04 | 0.975    | 3.165    |          |        |

|         |   |   |         |       |          |        |        |
|---------|---|---|---------|-------|----------|--------|--------|
|         |   | 3 | 1.519*  | 0.547 | 7.32E-03 | 0.425  | 2.614  |
|         |   | 4 | 2.737*  | 0.566 | 9.77E-06 | 1.604  | 3.87   |
|         |   | 6 | 2.641*  | 0.547 | 9.96E-06 | 1.546  | 3.736  |
|         |   | 7 | 1.990*  | 0.547 | 5.76E-04 | 0.895  | 3.085  |
|         |   | 8 | 2.762*  | 0.566 | 8.31E-06 | 1.629  | 3.895  |
|         |   | 9 | 2.724*  | 0.547 | 5.72E-06 | 1.63   | 3.819  |
|         | 6 | 1 | -2.783* | 0.566 | 7.28E-06 | -3.916 | -1.65  |
|         |   | 2 | -0.571  | 0.547 | 3.01E-01 | -1.665 | 0.524  |
|         |   | 3 | -1.121* | 0.547 | 4.48E-02 | -2.216 | -0.027 |
|         |   | 4 | 0.096   | 0.566 | 8.66E-01 | -1.037 | 1.229  |
|         |   | 5 | -2.641* | 0.547 | 9.96E-06 | -3.736 | -1.546 |
|         |   | 7 | -0.651  | 0.547 | 2.39E-01 | -1.746 | 0.444  |
|         |   | 8 | 0.121   | 0.566 | 8.32E-01 | -1.012 | 1.254  |
|         |   | 9 | 0.084   | 0.547 | 8.79E-01 | -1.011 | 1.178  |
|         | 7 | 1 | -2.132* | 0.566 | 3.84E-04 | -3.265 | -0.999 |
|         |   | 2 | 0.08    | 0.547 | 8.84E-01 | -1.014 | 1.175  |
|         |   | 3 | -0.47   | 0.547 | 3.94E-01 | -1.565 | 0.624  |
|         |   | 4 | 0.747   | 0.566 | 1.92E-01 | -0.386 | 1.88   |
|         |   | 5 | -1.990* | 0.547 | 5.76E-04 | -3.085 | -0.895 |
|         |   | 6 | 0.651   | 0.547 | 2.39E-01 | -0.444 | 1.746  |
|         |   | 8 | 0.772   | 0.566 | 1.78E-01 | -0.361 | 1.905  |
|         |   | 9 | 0.735   | 0.547 | 1.85E-01 | -0.36  | 1.829  |
|         | 8 | 1 | -2.904* | 0.585 | 6.05E-06 | -4.074 | -1.733 |
|         |   | 2 | -0.692  | 0.566 | 2.27E-01 | -1.825 | 0.441  |
|         |   | 3 | -1.242* | 0.566 | 3.22E-02 | -2.376 | -0.109 |
|         |   | 4 | -0.025  | 0.585 | 9.66E-01 | -1.196 | 1.145  |
|         |   | 5 | -2.762* | 0.566 | 8.31E-06 | -3.895 | -1.629 |
|         |   | 6 | -0.121  | 0.566 | 8.32E-01 | -1.254 | 1.012  |
|         |   | 7 | -0.772  | 0.566 | 1.78E-01 | -1.905 | 0.361  |
|         |   | 9 | -0.037  | 0.566 | 9.48E-01 | -1.171 | 1.096  |
|         | 9 | 1 | -2.866* | 0.566 | 4.25E-06 | -3.999 | -1.733 |
|         |   | 2 | -0.654  | 0.547 | 2.37E-01 | -1.749 | 0.44   |
|         |   | 3 | -1.205* | 0.547 | 3.15E-02 | -2.3   | -0.11  |
|         |   | 4 | 0.012   | 0.566 | 9.83E-01 | -1.121 | 1.145  |
|         |   | 5 | -2.724* | 0.547 | 5.72E-06 | -3.819 | -1.63  |
|         |   | 6 | -0.084  | 0.547 | 8.79E-01 | -1.178 | 1.011  |
|         |   | 7 | -0.735  | 0.547 | 1.85E-01 | -1.829 | 0.36   |
|         |   | 8 | 0.037   | 0.566 | 9.48E-01 | -1.096 | 1.171  |
| Tamhane | 1 | 2 | 2.212   | 0.565 | 1.04E-01 | -0.273 | 4.697  |
|         |   | 3 | 1.661   | 0.728 | 7.70E-01 | -1.274 | 4.597  |
|         |   | 4 | 2.878*  | 0.499 | 3.19E-02 | 0.231  | 5.525  |

---

|   |   |         |       |          |        |        |
|---|---|---------|-------|----------|--------|--------|
|   | 5 | 0.142   | 0.692 | 1.00E+00 | -2.651 | 2.935  |
|   | 6 | 2.783*  | 0.494 | 4.11E-02 | 0.103  | 5.462  |
|   | 7 | 2.132   | 0.842 | 6.13E-01 | -1.317 | 5.58   |
|   | 8 | 2.904*  | 0.496 | 3.19E-02 | 0.236  | 5.571  |
|   | 9 | 2.866*  | 0.497 | 3.39E-02 | 0.203  | 5.53   |
| 2 | 1 | -2.212  | 0.565 | 1.04E-01 | -4.697 | 0.273  |
|   | 3 | -0.551  | 0.609 | 1.00E+00 | -3.155 | 2.053  |
|   | 4 | 0.667   | 0.299 | 8.65E-01 | -0.71  | 2.044  |
|   | 5 | -2.07   | 0.565 | 1.22E-01 | -4.443 | 0.303  |
|   | 6 | 0.571   | 0.292 | 9.61E-01 | -0.825 | 1.967  |
|   | 7 | -0.08   | 0.741 | 1.00E+00 | -3.395 | 3.234  |
|   | 8 | 0.692   | 0.294 | 8.16E-01 | -0.696 | 2.08   |
|   | 9 | 0.654   | 0.295 | 8.76E-01 | -0.73  | 2.039  |
| 3 | 1 | -1.661  | 0.728 | 7.70E-01 | -4.597 | 1.274  |
|   | 2 | 0.551   | 0.609 | 1.00E+00 | -2.053 | 3.155  |
|   | 4 | 1.217   | 0.548 | 8.90E-01 | -1.479 | 3.913  |
|   | 5 | -1.519  | 0.728 | 8.73E-01 | -4.408 | 1.369  |
|   | 6 | 1.121   | 0.544 | 9.44E-01 | -1.594 | 3.837  |
|   | 7 | 0.47    | 0.872 | 1.00E+00 | -3.027 | 3.968  |
|   | 8 | 1.242   | 0.545 | 8.70E-01 | -1.466 | 3.951  |
|   | 9 | 1.205   | 0.546 | 8.97E-01 | -1.501 | 3.911  |
| 4 | 1 | -2.878* | 0.499 | 3.19E-02 | -5.525 | -0.231 |
|   | 2 | -0.667  | 0.299 | 8.65E-01 | -2.044 | 0.71   |
|   | 3 | -1.217  | 0.548 | 8.90E-01 | -3.913 | 1.479  |
|   | 5 | -2.737* | 0.499 | 2.51E-02 | -5.175 | -0.299 |
|   | 6 | -0.096  | 0.122 | 1.00E+00 | -0.608 | 0.416  |
|   | 7 | -0.747  | 0.692 | 1.00E+00 | -4.193 | 2.7    |
|   | 8 | 0.025   | 0.129 | 1.00E+00 | -0.51  | 0.56   |
|   | 9 | -0.012  | 0.131 | 1.00E+00 | -0.546 | 0.522  |
| 5 | 1 | -0.142  | 0.692 | 1.00E+00 | -2.935 | 2.651  |
|   | 2 | 2.07    | 0.565 | 1.22E-01 | -0.303 | 4.443  |
|   | 3 | 1.519   | 0.728 | 8.73E-01 | -1.369 | 4.408  |
|   | 4 | 2.737*  | 0.499 | 2.51E-02 | 0.299  | 5.175  |
|   | 6 | 2.641*  | 0.494 | 3.31E-02 | 0.182  | 5.099  |
|   | 7 | 1.99    | 0.842 | 7.21E-01 | -1.428 | 5.407  |
|   | 8 | 2.762*  | 0.496 | 2.48E-02 | 0.311  | 5.213  |
|   | 9 | 2.724*  | 0.496 | 2.67E-02 | 0.276  | 5.173  |
| 6 | 1 | -2.783* | 0.494 | 4.11E-02 | -5.462 | -0.103 |
|   | 2 | -0.571  | 0.292 | 9.61E-01 | -1.967 | 0.825  |
|   | 3 | -1.121  | 0.544 | 9.44E-01 | -3.837 | 1.594  |
|   | 4 | 0.096   | 0.122 | 1.00E+00 | -0.416 | 0.608  |

---

|    |     |   |   |         |       |          |        |        |
|----|-----|---|---|---------|-------|----------|--------|--------|
|    |     |   | 5 | -2.641* | 0.494 | 3.31E-02 | -5.099 | -0.182 |
|    |     |   | 7 | -0.651  | 0.689 | 1.00E+00 | -4.114 | 2.812  |
|    |     |   | 8 | 0.121   | 0.109 | 1.00E+00 | -0.326 | 0.568  |
|    |     |   | 9 | 0.084   | 0.112 | 1.00E+00 | -0.362 | 0.53   |
|    |     | 7 | 1 | -2.132  | 0.842 | 6.13E-01 | -5.58  | 1.317  |
|    |     |   | 2 | 0.08    | 0.741 | 1.00E+00 | -3.234 | 3.395  |
|    |     |   | 3 | -0.47   | 0.872 | 1.00E+00 | -3.968 | 3.027  |
|    |     |   | 4 | 0.747   | 0.692 | 1.00E+00 | -2.7   | 4.193  |
|    |     |   | 5 | -1.99   | 0.842 | 7.21E-01 | -5.407 | 1.428  |
|    |     |   | 6 | 0.651   | 0.689 | 1.00E+00 | -2.812 | 4.114  |
|    |     |   | 8 | 0.772   | 0.69  | 1.00E+00 | -2.685 | 4.229  |
|    |     |   | 9 | 0.735   | 0.691 | 1.00E+00 | -2.721 | 4.19   |
|    |     | 8 | 1 | -2.904* | 0.496 | 3.19E-02 | -5.571 | -0.236 |
|    |     |   | 2 | -0.692  | 0.294 | 8.16E-01 | -2.08  | 0.696  |
|    |     |   | 3 | -1.242  | 0.545 | 8.70E-01 | -3.951 | 1.466  |
|    |     |   | 4 | -0.025  | 0.129 | 1.00E+00 | -0.56  | 0.51   |
|    |     |   | 5 | -2.762* | 0.496 | 2.48E-02 | -5.213 | -0.311 |
|    |     |   | 6 | -0.121  | 0.109 | 1.00E+00 | -0.568 | 0.326  |
|    |     |   | 7 | -0.772  | 0.69  | 1.00E+00 | -4.229 | 2.685  |
|    |     |   | 9 | -0.037  | 0.119 | 1.00E+00 | -0.518 | 0.443  |
|    |     | 9 | 1 | -2.866* | 0.497 | 3.39E-02 | -5.53  | -0.203 |
|    |     |   | 2 | -0.654  | 0.295 | 8.76E-01 | -2.039 | 0.73   |
|    |     |   | 3 | -1.205  | 0.546 | 8.97E-01 | -3.911 | 1.501  |
|    |     |   | 4 | 0.012   | 0.131 | 1.00E+00 | -0.522 | 0.546  |
|    |     |   | 5 | -2.724* | 0.496 | 2.67E-02 | -5.173 | -0.276 |
|    |     |   | 6 | -0.084  | 0.112 | 1.00E+00 | -0.53  | 0.362  |
|    |     |   | 7 | -0.735  | 0.691 | 1.00E+00 | -4.19  | 2.721  |
|    |     |   | 8 | 0.037   | 0.119 | 1.00E+00 | -0.443 | 0.518  |
| Cn | LSD | 1 | 2 | 0.098   | 0.475 | 8.38E-01 | -0.852 | 1.047  |
|    |     |   | 3 | 0.029   | 0.475 | 9.51E-01 | -0.92  | 0.979  |
|    |     |   | 4 | -0.815  | 0.49  | 1.02E-01 | -1.796 | 0.166  |
|    |     |   | 5 | -0.948  | 0.475 | 5.04E-02 | -1.898 | 0.002  |
|    |     |   | 6 | -1.168* | 0.475 | 1.68E-02 | -2.117 | -0.218 |
|    |     |   | 7 | -1.101* | 0.475 | 2.39E-02 | -2.05  | -0.151 |
|    |     |   | 8 | -1.618* | 0.49  | 1.64E-03 | -2.598 | -0.637 |
|    |     |   | 9 | -0.995* | 0.475 | 4.04E-02 | -1.944 | -0.045 |
|    |     | 2 | 1 | -0.098  | 0.475 | 8.38E-01 | -1.047 | 0.852  |
|    |     |   | 3 | -0.068  | 0.459 | 8.82E-01 | -0.986 | 0.849  |
|    |     |   | 4 | -0.913  | 0.475 | 5.93E-02 | -1.863 | 0.037  |
|    |     |   | 5 | -1.045* | 0.459 | 2.62E-02 | -1.963 | -0.128 |
|    |     |   | 6 | -1.265* | 0.459 | 7.70E-03 | -2.183 | -0.348 |



---

|   |   |         |       |          |        |        |
|---|---|---------|-------|----------|--------|--------|
|   | 7 | -1.198* | 0.459 | 1.14E-02 | -2.116 | -0.281 |
|   | 8 | -1.715* | 0.475 | 6.22E-04 | -2.665 | -0.765 |
|   | 9 | -1.092* | 0.459 | 2.05E-02 | -2.01  | -0.174 |
| 3 | 1 | -0.029  | 0.475 | 9.51E-01 | -0.979 | 0.92   |
|   | 2 | 0.068   | 0.459 | 8.82E-01 | -0.849 | 0.986  |
|   | 4 | -0.845  | 0.475 | 8.03E-02 | -1.795 | 0.105  |
|   | 5 | -.977*  | 0.459 | 3.73E-02 | -1.895 | -0.06  |
|   | 6 | -1.197* | 0.459 | 1.14E-02 | -2.115 | -0.279 |
|   | 7 | -1.130* | 0.459 | 1.67E-02 | -2.048 | -0.212 |
|   | 8 | -1.647* | 0.475 | 9.75E-04 | -2.597 | -0.697 |
|   | 9 | -1.024* | 0.459 | 2.94E-02 | -1.941 | -0.106 |
| 4 | 1 | 0.815   | 0.49  | 1.02E-01 | -0.166 | 1.796  |
|   | 2 | 0.913   | 0.475 | 5.93E-02 | -0.037 | 1.863  |
|   | 3 | 0.845   | 0.475 | 8.03E-02 | -0.105 | 1.795  |
|   | 5 | -0.132  | 0.475 | 7.81E-01 | -1.082 | 0.817  |
|   | 6 | -0.352  | 0.475 | 4.61E-01 | -1.302 | 0.598  |
|   | 7 | -0.285  | 0.475 | 5.50E-01 | -1.235 | 0.665  |
|   | 8 | -0.802  | 0.49  | 1.07E-01 | -1.783 | 0.179  |
|   | 9 | -0.179  | 0.475 | 7.07E-01 | -1.129 | 0.771  |
| 5 | 1 | 0.948   | 0.475 | 5.04E-02 | -0.002 | 1.898  |
|   | 2 | 1.045*  | 0.459 | 2.62E-02 | 0.128  | 1.963  |
|   | 3 | .977*   | 0.459 | 3.73E-02 | 0.06   | 1.895  |
|   | 4 | 0.132   | 0.475 | 7.81E-01 | -0.817 | 1.082  |
|   | 6 | -0.22   | 0.459 | 6.34E-01 | -1.137 | 0.698  |
|   | 7 | -0.153  | 0.459 | 7.40E-01 | -1.07  | 0.765  |
|   | 8 | -0.67   | 0.475 | 1.64E-01 | -1.619 | 0.28   |
|   | 9 | -0.047  | 0.459 | 9.19E-01 | -0.964 | 0.871  |
| 6 | 1 | 1.168*  | 0.475 | 1.68E-02 | 0.218  | 2.117  |
|   | 2 | 1.265*  | 0.459 | 7.70E-03 | 0.348  | 2.183  |
|   | 3 | 1.197*  | 0.459 | 1.14E-02 | 0.279  | 2.115  |
|   | 4 | 0.352   | 0.475 | 4.61E-01 | -0.598 | 1.302  |
|   | 5 | 0.22    | 0.459 | 6.34E-01 | -0.698 | 1.137  |
|   | 7 | 0.067   | 0.459 | 8.84E-01 | -0.851 | 0.985  |
|   | 8 | -0.45   | 0.475 | 3.47E-01 | -1.4   | 0.5    |
|   | 9 | 0.173   | 0.459 | 7.07E-01 | -0.744 | 1.091  |
| 7 | 1 | 1.101*  | 0.475 | 2.39E-02 | 0.151  | 2.05   |
|   | 2 | 1.198*  | 0.459 | 1.14E-02 | 0.281  | 2.116  |
|   | 3 | 1.130*  | 0.459 | 1.67E-02 | 0.212  | 2.048  |
|   | 4 | 0.285   | 0.475 | 5.50E-01 | -0.665 | 1.235  |
|   | 5 | 0.153   | 0.459 | 7.40E-01 | -0.765 | 1.07   |
|   | 6 | -0.067  | 0.459 | 8.84E-01 | -0.985 | 0.851  |

---

|         |   |   |         |       |          |        |        |
|---------|---|---|---------|-------|----------|--------|--------|
|         |   | 8 | -0.517  | 0.475 | 2.81E-01 | -1.467 | 0.433  |
|         |   | 9 | 0.106   | 0.459 | 8.18E-01 | -0.811 | 1.024  |
|         | 8 | 1 | 1.618*  | 0.49  | 1.64E-03 | 0.637  | 2.598  |
|         |   | 2 | 1.715*  | 0.475 | 6.22E-04 | 0.765  | 2.665  |
|         |   | 3 | 1.647*  | 0.475 | 9.75E-04 | 0.697  | 2.597  |
|         |   | 4 | 0.802   | 0.49  | 1.07E-01 | -0.179 | 1.783  |
|         |   | 5 | 0.67    | 0.475 | 1.64E-01 | -0.28  | 1.619  |
|         |   | 6 | 0.45    | 0.475 | 3.47E-01 | -0.5   | 1.4    |
|         |   | 7 | 0.517   | 0.475 | 2.81E-01 | -0.433 | 1.467  |
|         |   | 9 | 0.623   | 0.475 | 1.95E-01 | -0.327 | 1.573  |
|         | 9 | 1 | .995*   | 0.475 | 4.04E-02 | 0.045  | 1.944  |
|         |   | 2 | 1.092*  | 0.459 | 2.05E-02 | 0.174  | 2.01   |
|         |   | 3 | 1.024*  | 0.459 | 2.94E-02 | 0.106  | 1.941  |
|         |   | 4 | 0.179   | 0.475 | 7.07E-01 | -0.771 | 1.129  |
|         |   | 5 | 0.047   | 0.459 | 9.19E-01 | -0.871 | 0.964  |
|         |   | 6 | -0.173  | 0.459 | 7.07E-01 | -1.091 | 0.744  |
|         |   | 7 | -0.106  | 0.459 | 8.18E-01 | -1.024 | 0.811  |
|         |   | 8 | -0.623  | 0.475 | 1.95E-01 | -1.573 | 0.327  |
| Tamhane | 1 | 2 | 0.098   | 0.361 | 1.00E+00 | -1.386 | 1.581  |
|         |   | 3 | 0.029   | 0.295 | 1.00E+00 | -1.16  | 1.218  |
|         |   | 4 | -0.815  | 0.42  | 9.56E-01 | -2.69  | 1.059  |
|         |   | 5 | -0.948  | 0.472 | 9.33E-01 | -3.006 | 1.11   |
|         |   | 6 | -1.168  | 0.385 | 3.28E-01 | -2.775 | 0.44   |
|         |   | 7 | -1.101  | 0.49  | 8.37E-01 | -3.256 | 1.055  |
|         |   | 8 | -1.618* | 0.329 | 1.50E-02 | -2.995 | -0.24  |
|         |   | 9 | -0.995  | 0.376 | 5.46E-01 | -2.553 | 0.564  |
|         | 2 | 1 | -0.098  | 0.361 | 1.00E+00 | -1.581 | 1.386  |
|         |   | 3 | -0.068  | 0.365 | 1.00E+00 | -1.551 | 1.414  |
|         |   | 4 | -0.913  | 0.473 | 9.45E-01 | -2.859 | 1.033  |
|         |   | 5 | -1.045  | 0.519 | 9.14E-01 | -3.158 | 1.067  |
|         |   | 6 | -1.265  | 0.442 | 3.66E-01 | -3.018 | 0.488  |
|         |   | 7 | -1.198  | 0.535 | 8.07E-01 | -3.394 | 0.997  |
|         |   | 8 | -1.715* | 0.394 | 2.79E-02 | -3.304 | -0.126 |
|         |   | 9 | -1.092  | 0.433 | 5.91E-01 | -2.809 | 0.625  |
|         | 3 | 1 | -0.029  | 0.295 | 1.00E+00 | -1.218 | 1.16   |
|         |   | 2 | 0.068   | 0.365 | 1.00E+00 | -1.414 | 1.551  |
|         |   | 4 | -0.845  | 0.424 | 9.40E-01 | -2.711 | 1.022  |
|         |   | 5 | -0.977  | 0.476 | 9.15E-01 | -3.03  | 1.076  |
|         |   | 6 | -1.197  | 0.39  | 2.96E-01 | -2.802 | 0.408  |
|         |   | 7 | -1.13   | 0.494 | 8.09E-01 | -3.279 | 1.019  |
|         |   | 8 | -1.647* | 0.335 | 1.23E-02 | -3.022 | -0.272 |

|   |   |        |       |          |        |       |
|---|---|--------|-------|----------|--------|-------|
|   | 9 | -1.024 | 0.38  | 5.03E-01 | -2.58  | 0.533 |
| 4 | 1 | 0.815  | 0.42  | 9.56E-01 | -1.059 | 2.69  |
|   | 2 | 0.913  | 0.473 | 9.45E-01 | -1.033 | 2.859 |
|   | 3 | 0.845  | 0.424 | 9.40E-01 | -1.022 | 2.711 |
|   | 5 | -0.132 | 0.562 | 1.00E+00 | -2.402 | 2.137 |
|   | 6 | -0.352 | 0.492 | 1.00E+00 | -2.354 | 1.65  |
|   | 7 | -0.285 | 0.577 | 1.00E+00 | -2.621 | 2.051 |
|   | 8 | -0.802 | 0.449 | 9.80E-01 | -2.713 | 1.108 |
|   | 9 | -0.179 | 0.484 | 1.00E+00 | -2.158 | 1.799 |
| 5 | 1 | 0.948  | 0.472 | 9.33E-01 | -1.11  | 3.006 |
|   | 2 | 1.045  | 0.519 | 9.14E-01 | -1.067 | 3.158 |
|   | 3 | 0.977  | 0.476 | 9.15E-01 | -1.076 | 3.03  |
|   | 4 | 0.132  | 0.562 | 1.00E+00 | -2.137 | 2.402 |
|   | 6 | -0.22  | 0.537 | 1.00E+00 | -2.378 | 1.938 |
|   | 7 | -0.153 | 0.616 | 1.00E+00 | -2.593 | 2.288 |
|   | 8 | -0.67  | 0.498 | 1.00E+00 | -2.754 | 1.415 |
|   | 9 | -0.047 | 0.53  | 1.00E+00 | -2.185 | 2.092 |
| 6 | 1 | 1.168  | 0.385 | 3.28E-01 | -0.44  | 2.775 |
|   | 2 | 1.265  | 0.442 | 3.66E-01 | -0.488 | 3.018 |
|   | 3 | 1.197  | 0.39  | 2.96E-01 | -0.408 | 2.802 |
|   | 4 | 0.352  | 0.492 | 1.00E+00 | -1.65  | 2.354 |
|   | 5 | 0.22   | 0.537 | 1.00E+00 | -1.938 | 2.378 |
|   | 7 | 0.067  | 0.553 | 1.00E+00 | -2.168 | 2.302 |
|   | 8 | -0.45  | 0.417 | 1.00E+00 | -2.14  | 1.241 |
|   | 9 | 0.173  | 0.454 | 1.00E+00 | -1.626 | 1.972 |
| 7 | 1 | 1.101  | 0.49  | 8.37E-01 | -1.055 | 3.256 |
|   | 2 | 1.198  | 0.535 | 8.07E-01 | -0.997 | 3.394 |
|   | 3 | 1.13   | 0.494 | 8.09E-01 | -1.019 | 3.279 |
|   | 4 | 0.285  | 0.577 | 1.00E+00 | -2.051 | 2.621 |
|   | 5 | 0.153  | 0.616 | 1.00E+00 | -2.288 | 2.593 |
|   | 6 | -0.067 | 0.553 | 1.00E+00 | -2.302 | 2.168 |
|   | 8 | -0.517 | 0.515 | 1.00E+00 | -2.69  | 1.656 |
|   | 9 | 0.106  | 0.546 | 1.00E+00 | -2.112 | 2.324 |
| 8 | 1 | 1.618* | 0.329 | 1.50E-02 | 0.24   | 2.995 |
|   | 2 | 1.715* | 0.394 | 2.79E-02 | 0.126  | 3.304 |
|   | 3 | 1.647* | 0.335 | 1.23E-02 | 0.272  | 3.022 |
|   | 4 | 0.802  | 0.449 | 9.80E-01 | -1.108 | 2.713 |
|   | 5 | 0.67   | 0.498 | 1.00E+00 | -1.415 | 2.754 |
|   | 6 | 0.45   | 0.417 | 1.00E+00 | -1.241 | 2.14  |
|   | 7 | 0.517  | 0.515 | 1.00E+00 | -1.656 | 2.69  |
|   | 9 | 0.623  | 0.408 | 9.97E-01 | -1.027 | 2.273 |

|    |     |   |   |        |       |          |        |        |
|----|-----|---|---|--------|-------|----------|--------|--------|
|    |     | 9 | 1 | 0.995  | 0.376 | 5.46E-01 | -0.564 | 2.553  |
|    |     |   | 2 | 1.092  | 0.433 | 5.91E-01 | -0.625 | 2.809  |
|    |     |   | 3 | 1.024  | 0.38  | 5.03E-01 | -0.533 | 2.58   |
|    |     |   | 4 | 0.179  | 0.484 | 1.00E+00 | -1.799 | 2.158  |
|    |     |   | 5 | 0.047  | 0.53  | 1.00E+00 | -2.092 | 2.185  |
|    |     |   | 6 | -0.173 | 0.454 | 1.00E+00 | -1.972 | 1.626  |
|    |     |   | 7 | -0.106 | 0.546 | 1.00E+00 | -2.324 | 2.112  |
|    |     |   | 8 | -0.623 | 0.408 | 9.97E-01 | -2.273 | 1.027  |
| GA | LSD | 1 | 2 | .501*  | 0.068 | 6.08E-10 | 0.365  | 0.638  |
|    |     |   | 3 | .463*  | 0.068 | 5.49E-09 | 0.327  | 0.6    |
|    |     |   | 4 | .515*  | 0.07  | 7.24E-10 | 0.374  | 0.656  |
|    |     |   | 5 | .567*  | 0.068 | 1.37E-11 | 0.431  | 0.704  |
|    |     |   | 6 | .554*  | 0.068 | 3.00E-11 | 0.417  | 0.69   |
|    |     |   | 7 | .573*  | 0.068 | 9.64E-12 | 0.437  | 0.71   |
|    |     |   | 8 | .565*  | 0.07  | 4.46E-11 | 0.424  | 0.705  |
|    |     |   | 9 | .568*  | 0.068 | 1.31E-11 | 0.432  | 0.704  |
|    |     | 2 | 1 | -.501* | 0.068 | 6.08E-10 | -0.638 | -0.365 |
|    |     |   | 3 | -0.038 | 0.066 | 5.64E-01 | -0.17  | 0.094  |
|    |     |   | 4 | 0.013  | 0.068 | 8.46E-01 | -0.123 | 0.15   |
|    |     |   | 5 | 0.066  | 0.066 | 3.22E-01 | -0.066 | 0.197  |
|    |     |   | 6 | 0.052  | 0.066 | 4.31E-01 | -0.08  | 0.184  |
|    |     |   | 7 | 0.072  | 0.066 | 2.79E-01 | -0.06  | 0.204  |
|    |     |   | 8 | 0.063  | 0.068 | 3.57E-01 | -0.073 | 0.2    |
|    |     |   | 9 | 0.067  | 0.066 | 3.16E-01 | -0.065 | 0.198  |
|    |     | 3 | 1 | -.463* | 0.068 | 5.49E-09 | -0.6   | -0.327 |
|    |     |   | 2 | 0.038  | 0.066 | 5.64E-01 | -0.094 | 0.17   |
|    |     |   | 4 | 0.051  | 0.068 | 4.53E-01 | -0.085 | 0.188  |
|    |     |   | 5 | 0.104  | 0.066 | 1.20E-01 | -0.028 | 0.236  |
|    |     |   | 6 | 0.09   | 0.066 | 1.75E-01 | -0.041 | 0.222  |
|    |     |   | 7 | 0.11   | 0.066 | 9.97E-02 | -0.022 | 0.242  |
|    |     |   | 8 | 0.101  | 0.068 | 1.42E-01 | -0.035 | 0.238  |
|    |     |   | 9 | 0.105  | 0.066 | 1.17E-01 | -0.027 | 0.236  |
|    |     | 4 | 1 | -.515* | 0.07  | 7.24E-10 | -0.656 | -0.374 |
|    |     |   | 2 | -0.013 | 0.068 | 8.46E-01 | -0.15  | 0.123  |
|    |     |   | 3 | -0.051 | 0.068 | 4.53E-01 | -0.188 | 0.085  |
|    |     |   | 5 | 0.052  | 0.068 | 4.45E-01 | -0.084 | 0.189  |
|    |     |   | 6 | 0.039  | 0.068 | 5.71E-01 | -0.097 | 0.175  |
|    |     |   | 7 | 0.059  | 0.068 | 3.93E-01 | -0.078 | 0.195  |
|    |     |   | 8 | 0.05   | 0.07  | 4.81E-01 | -0.091 | 0.191  |
|    |     |   | 9 | 0.053  | 0.068 | 4.38E-01 | -0.083 | 0.19   |
|    |     | 5 | 1 | -.567* | 0.068 | 1.37E-11 | -0.704 | -0.431 |

|         |   |   |        |       |          |        |        |
|---------|---|---|--------|-------|----------|--------|--------|
|         |   | 2 | -0.066 | 0.066 | 3.22E-01 | -0.197 | 0.066  |
|         |   | 3 | -0.104 | 0.066 | 1.20E-01 | -0.236 | 0.028  |
|         |   | 4 | -0.052 | 0.068 | 4.45E-01 | -0.189 | 0.084  |
|         |   | 6 | -0.014 | 0.066 | 8.37E-01 | -0.145 | 0.118  |
|         |   | 7 | 0.006  | 0.066 | 9.26E-01 | -0.126 | 0.138  |
|         |   | 8 | -0.003 | 0.068 | 9.70E-01 | -0.139 | 0.134  |
|         |   | 9 | 0.001  | 0.066 | 9.90E-01 | -0.131 | 0.132  |
|         | 6 | 1 | -.554* | 0.068 | 3.00E-11 | -0.69  | -0.417 |
|         |   | 2 | -0.052 | 0.066 | 4.31E-01 | -0.184 | 0.08   |
|         |   | 3 | -0.09  | 0.066 | 1.75E-01 | -0.222 | 0.041  |
|         |   | 4 | -0.039 | 0.068 | 5.71E-01 | -0.175 | 0.097  |
|         |   | 5 | 0.014  | 0.066 | 8.37E-01 | -0.118 | 0.145  |
|         |   | 7 | 0.02   | 0.066 | 7.65E-01 | -0.112 | 0.151  |
|         |   | 8 | 0.011  | 0.068 | 8.72E-01 | -0.125 | 0.147  |
|         |   | 9 | 0.014  | 0.066 | 8.27E-01 | -0.117 | 0.146  |
|         | 7 | 1 | -.573* | 0.068 | 9.64E-12 | -0.71  | -0.437 |
|         |   | 2 | -0.072 | 0.066 | 2.79E-01 | -0.204 | 0.06   |
|         |   | 3 | -0.11  | 0.066 | 9.97E-02 | -0.242 | 0.022  |
|         |   | 4 | -0.059 | 0.068 | 3.93E-01 | -0.195 | 0.078  |
|         |   | 5 | -0.006 | 0.066 | 9.26E-01 | -0.138 | 0.126  |
|         |   | 6 | -0.02  | 0.066 | 7.65E-01 | -0.151 | 0.112  |
|         |   | 8 | -0.009 | 0.068 | 8.99E-01 | -0.145 | 0.128  |
|         |   | 9 | -0.005 | 0.066 | 9.36E-01 | -0.137 | 0.126  |
|         | 8 | 1 | -.565* | 0.07  | 4.46E-11 | -0.705 | -0.424 |
|         |   | 2 | -0.063 | 0.068 | 3.57E-01 | -0.2   | 0.073  |
|         |   | 3 | -0.101 | 0.068 | 1.42E-01 | -0.238 | 0.035  |
|         |   | 4 | -0.05  | 0.07  | 4.81E-01 | -0.191 | 0.091  |
|         |   | 5 | 0.003  | 0.068 | 9.70E-01 | -0.134 | 0.139  |
|         |   | 6 | -0.011 | 0.068 | 8.72E-01 | -0.147 | 0.125  |
|         |   | 7 | 0.009  | 0.068 | 8.99E-01 | -0.128 | 0.145  |
|         |   | 9 | 0.003  | 0.068 | 9.61E-01 | -0.133 | 0.14   |
|         | 9 | 1 | -.568* | 0.068 | 1.31E-11 | -0.704 | -0.432 |
|         |   | 2 | -0.067 | 0.066 | 3.16E-01 | -0.198 | 0.065  |
|         |   | 3 | -0.105 | 0.066 | 1.17E-01 | -0.236 | 0.027  |
|         |   | 4 | -0.053 | 0.068 | 4.38E-01 | -0.19  | 0.083  |
|         |   | 5 | -0.001 | 0.066 | 9.90E-01 | -0.132 | 0.131  |
|         |   | 6 | -0.014 | 0.066 | 8.27E-01 | -0.146 | 0.117  |
|         |   | 7 | 0.005  | 0.066 | 9.36E-01 | -0.126 | 0.137  |
|         |   | 8 | -0.003 | 0.068 | 9.61E-01 | -0.14  | 0.133  |
| Tamhane | 1 | 2 | .501*  | 0.096 | 1.26E-02 | 0.087  | 0.916  |
|         |   | 3 | .463*  | 0.088 | 2.71E-02 | 0.044  | 0.882  |

---

|   |   |        |       |          |        |        |
|---|---|--------|-------|----------|--------|--------|
|   | 4 | .515*  | 0.113 | 2.41E-02 | 0.048  | 0.982  |
|   | 5 | .567*  | 0.085 | 8.99E-03 | 0.141  | 0.994  |
|   | 6 | .554*  | 0.089 | 7.55E-03 | 0.138  | 0.969  |
|   | 7 | .573*  | 0.084 | 9.56E-03 | 0.142  | 1.005  |
|   | 8 | .565*  | 0.088 | 7.26E-03 | 0.146  | 0.983  |
|   | 9 | .568*  | 0.092 | 5.39E-03 | 0.155  | 0.981  |
| 2 | 1 | -.501* | 0.096 | 1.26E-02 | -0.916 | -0.087 |
|   | 3 | -0.038 | 0.061 | 1.00E+00 | -0.291 | 0.215  |
|   | 4 | 0.013  | 0.094 | 1.00E+00 | -0.391 | 0.417  |
|   | 5 | 0.066  | 0.058 | 1.00E+00 | -0.184 | 0.315  |
|   | 6 | 0.052  | 0.063 | 1.00E+00 | -0.206 | 0.31   |
|   | 7 | 0.072  | 0.056 | 1.00E+00 | -0.178 | 0.322  |
|   | 8 | 0.063  | 0.062 | 1.00E+00 | -0.193 | 0.32   |
|   | 9 | 0.067  | 0.067 | 1.00E+00 | -0.201 | 0.334  |
| 3 | 1 | -.463* | 0.088 | 2.71E-02 | -0.882 | -0.044 |
|   | 2 | 0.038  | 0.061 | 1.00E+00 | -0.215 | 0.291  |
|   | 4 | 0.051  | 0.085 | 1.00E+00 | -0.355 | 0.458  |
|   | 5 | 0.104  | 0.042 | 6.26E-01 | -0.063 | 0.271  |
|   | 6 | 0.09   | 0.049 | 9.62E-01 | -0.104 | 0.285  |
|   | 7 | 0.11   | 0.04  | 4.42E-01 | -0.051 | 0.271  |
|   | 8 | 0.101  | 0.047 | 8.49E-01 | -0.089 | 0.292  |
|   | 9 | 0.105  | 0.053 | 9.30E-01 | -0.11  | 0.32   |
| 4 | 1 | -.515* | 0.113 | 2.41E-02 | -0.982 | -0.048 |
|   | 2 | -0.013 | 0.094 | 1.00E+00 | -0.417 | 0.391  |
|   | 3 | -0.051 | 0.085 | 1.00E+00 | -0.458 | 0.355  |
|   | 5 | 0.052  | 0.083 | 1.00E+00 | -0.361 | 0.466  |
|   | 6 | 0.039  | 0.087 | 1.00E+00 | -0.365 | 0.442  |
|   | 7 | 0.059  | 0.082 | 1.00E+00 | -0.36  | 0.477  |
|   | 8 | 0.05   | 0.086 | 1.00E+00 | -0.356 | 0.456  |
|   | 9 | 0.053  | 0.09  | 1.00E+00 | -0.348 | 0.455  |
| 5 | 1 | -.567* | 0.085 | 8.99E-03 | -0.994 | -0.141 |
|   | 2 | -0.066 | 0.058 | 1.00E+00 | -0.315 | 0.184  |
|   | 3 | -0.104 | 0.042 | 6.26E-01 | -0.271 | 0.063  |
|   | 4 | -0.052 | 0.083 | 1.00E+00 | -0.466 | 0.361  |
|   | 6 | -0.014 | 0.045 | 1.00E+00 | -0.197 | 0.169  |
|   | 7 | 0.006  | 0.035 | 1.00E+00 | -0.132 | 0.144  |
|   | 8 | -0.003 | 0.043 | 1.00E+00 | -0.181 | 0.176  |
|   | 9 | 0.001  | 0.05  | 1.00E+00 | -0.206 | 0.208  |
| 6 | 1 | -.554* | 0.089 | 7.55E-03 | -0.969 | -0.138 |
|   | 2 | -0.052 | 0.063 | 1.00E+00 | -0.31  | 0.206  |
|   | 3 | -0.09  | 0.049 | 9.62E-01 | -0.285 | 0.104  |

---

|     |     |   |   |        |       |          |        |        |
|-----|-----|---|---|--------|-------|----------|--------|--------|
|     |     |   | 4 | -0.039 | 0.087 | 1.00E+00 | -0.442 | 0.365  |
|     |     |   | 5 | 0.014  | 0.045 | 1.00E+00 | -0.169 | 0.197  |
|     |     |   | 7 | 0.02   | 0.043 | 1.00E+00 | -0.159 | 0.199  |
|     |     |   | 8 | 0.011  | 0.05  | 1.00E+00 | -0.191 | 0.213  |
|     |     |   | 9 | 0.014  | 0.056 | 1.00E+00 | -0.208 | 0.237  |
|     |     | 7 | 1 | -.573* | 0.084 | 9.56E-03 | -1.005 | -0.142 |
|     |     |   | 2 | -0.072 | 0.056 | 1.00E+00 | -0.322 | 0.178  |
|     |     |   | 3 | -0.11  | 0.04  | 4.42E-01 | -0.271 | 0.051  |
|     |     |   | 4 | -0.059 | 0.082 | 1.00E+00 | -0.477 | 0.36   |
|     |     |   | 5 | -0.006 | 0.035 | 1.00E+00 | -0.144 | 0.132  |
|     |     |   | 6 | -0.02  | 0.043 | 1.00E+00 | -0.199 | 0.159  |
|     |     |   | 8 | -0.009 | 0.041 | 1.00E+00 | -0.183 | 0.166  |
|     |     |   | 9 | -0.005 | 0.048 | 1.00E+00 | -0.21  | 0.199  |
|     |     | 8 | 1 | -.565* | 0.088 | 7.26E-03 | -0.983 | -0.146 |
|     |     |   | 2 | -0.063 | 0.062 | 1.00E+00 | -0.32  | 0.193  |
|     |     |   | 3 | -0.101 | 0.047 | 8.49E-01 | -0.292 | 0.089  |
|     |     |   | 4 | -0.05  | 0.086 | 1.00E+00 | -0.456 | 0.356  |
|     |     |   | 5 | 0.003  | 0.043 | 1.00E+00 | -0.176 | 0.181  |
|     |     |   | 6 | -0.011 | 0.05  | 1.00E+00 | -0.213 | 0.191  |
|     |     |   | 7 | 0.009  | 0.041 | 1.00E+00 | -0.166 | 0.183  |
|     |     |   | 9 | 0.003  | 0.054 | 1.00E+00 | -0.217 | 0.224  |
|     |     | 9 | 1 | -.568* | 0.092 | 5.39E-03 | -0.981 | -0.155 |
|     |     |   | 2 | -0.067 | 0.067 | 1.00E+00 | -0.334 | 0.201  |
|     |     |   | 3 | -0.105 | 0.053 | 9.30E-01 | -0.32  | 0.11   |
|     |     |   | 4 | -0.053 | 0.09  | 1.00E+00 | -0.455 | 0.348  |
|     |     |   | 5 | -0.001 | 0.05  | 1.00E+00 | -0.208 | 0.206  |
|     |     |   | 6 | -0.014 | 0.056 | 1.00E+00 | -0.237 | 0.208  |
|     |     |   | 7 | 0.005  | 0.048 | 1.00E+00 | -0.199 | 0.21   |
|     |     |   | 8 | -0.003 | 0.054 | 1.00E+00 | -0.224 | 0.217  |
| Man | LSD | 1 | 2 | .352*  | 0.043 | 1.81E-11 | 0.267  | 0.438  |
|     |     |   | 3 | .308*  | 0.043 | 1.03E-09 | 0.223  | 0.394  |
|     |     |   | 4 | .377*  | 0.044 | 5.57E-12 | 0.289  | 0.465  |
|     |     |   | 5 | .455*  | 0.043 | 1.82E-15 | 0.37   | 0.54   |
|     |     |   | 6 | .420*  | 0.043 | 4.01E-14 | 0.334  | 0.505  |
|     |     |   | 7 | .413*  | 0.043 | 7.26E-14 | 0.328  | 0.499  |
|     |     |   | 8 | .416*  | 0.044 | 1.77E-13 | 0.328  | 0.505  |
|     |     |   | 9 | .385*  | 0.043 | 9.41E-13 | 0.299  | 0.47   |
|     |     | 2 | 1 | -.352* | 0.043 | 1.81E-11 | -0.438 | -0.267 |
|     |     |   | 3 | -0.044 | 0.041 | 2.92E-01 | -0.126 | 0.039  |
|     |     |   | 4 | 0.025  | 0.043 | 5.63E-01 | -0.061 | 0.11   |
|     |     |   | 5 | .103*  | 0.041 | 1.57E-02 | 0.02   | 0.185  |

---

|   |   |         |       |          |        |        |
|---|---|---------|-------|----------|--------|--------|
|   | 6 | 0.067   | 0.041 | 1.07E-01 | -0.015 | 0.15   |
|   | 7 | 0.061   | 0.041 | 1.45E-01 | -0.022 | 0.143  |
|   | 8 | 0.064   | 0.043 | 1.38E-01 | -0.021 | 0.15   |
|   | 9 | 0.032   | 0.041 | 4.35E-01 | -0.05  | 0.115  |
| 3 | 1 | -0.308* | 0.043 | 1.03E-09 | -0.394 | -0.223 |
|   | 2 | 0.044   | 0.041 | 2.92E-01 | -0.039 | 0.126  |
|   | 4 | 0.069   | 0.043 | 1.13E-01 | -0.017 | 0.154  |
|   | 5 | .146*   | 0.041 | 7.53E-04 | 0.064  | 0.229  |
|   | 6 | .111*   | 0.041 | 8.99E-03 | 0.029  | 0.194  |
|   | 7 | .105*   | 0.041 | 1.37E-02 | 0.022  | 0.187  |
|   | 8 | .108*   | 0.043 | 1.40E-02 | 0.023  | 0.193  |
|   | 9 | 0.076   | 0.041 | 6.93E-02 | -0.006 | 0.159  |
| 4 | 1 | -0.377* | 0.044 | 5.57E-12 | -0.465 | -0.289 |
|   | 2 | -0.025  | 0.043 | 5.63E-01 | -0.11  | 0.061  |
|   | 3 | -0.069  | 0.043 | 1.13E-01 | -0.154 | 0.017  |
|   | 5 | 0.078   | 0.043 | 7.36E-02 | -0.008 | 0.163  |
|   | 6 | 0.043   | 0.043 | 3.22E-01 | -0.043 | 0.128  |
|   | 7 | 0.036   | 0.043 | 4.03E-01 | -0.049 | 0.121  |
|   | 8 | 0.039   | 0.044 | 3.77E-01 | -0.049 | 0.127  |
|   | 9 | 0.008   | 0.043 | 8.60E-01 | -0.078 | 0.093  |
| 5 | 1 | -0.455* | 0.043 | 1.82E-15 | -0.54  | -0.37  |
|   | 2 | -0.103* | 0.041 | 1.57E-02 | -0.185 | -0.02  |
|   | 3 | -0.146* | 0.041 | 7.53E-04 | -0.229 | -0.064 |
|   | 4 | -0.078  | 0.043 | 7.36E-02 | -0.163 | 0.008  |
|   | 6 | -0.035  | 0.041 | 3.98E-01 | -0.118 | 0.047  |
|   | 7 | -0.042  | 0.041 | 3.16E-01 | -0.124 | 0.041  |
|   | 8 | -0.038  | 0.043 | 3.71E-01 | -0.124 | 0.047  |
|   | 9 | -0.07   | 0.041 | 9.40E-02 | -0.153 | 0.012  |
| 6 | 1 | -0.420* | 0.043 | 4.01E-14 | -0.505 | -0.334 |
|   | 2 | -0.067  | 0.041 | 1.07E-01 | -0.15  | 0.015  |
|   | 3 | -0.111* | 0.041 | 8.99E-03 | -0.194 | -0.029 |
|   | 4 | -0.043  | 0.043 | 3.22E-01 | -0.128 | 0.043  |
|   | 5 | 0.035   | 0.041 | 3.98E-01 | -0.047 | 0.118  |
|   | 7 | -0.007  | 0.041 | 8.73E-01 | -0.089 | 0.076  |
|   | 8 | -0.003  | 0.043 | 9.38E-01 | -0.089 | 0.082  |
|   | 9 | -0.035  | 0.041 | 3.98E-01 | -0.118 | 0.047  |
| 7 | 1 | -0.413* | 0.043 | 7.26E-14 | -0.499 | -0.328 |
|   | 2 | -0.061  | 0.041 | 1.45E-01 | -0.143 | 0.022  |
|   | 3 | -0.105* | 0.041 | 1.37E-02 | -0.187 | -0.022 |
|   | 4 | -0.036  | 0.043 | 4.03E-01 | -0.121 | 0.049  |
|   | 5 | 0.042   | 0.041 | 3.16E-01 | -0.041 | 0.124  |

---



|         |   |   |        |       |          |        |        |
|---------|---|---|--------|-------|----------|--------|--------|
|         |   | 6 | 0.007  | 0.041 | 8.73E-01 | -0.076 | 0.089  |
|         |   | 8 | 0.003  | 0.043 | 9.39E-01 | -0.082 | 0.089  |
|         |   | 9 | -0.028 | 0.041 | 4.93E-01 | -0.111 | 0.054  |
|         | 8 | 1 | -.416* | 0.044 | 1.77E-13 | -0.505 | -0.328 |
|         |   | 2 | -0.064 | 0.043 | 1.38E-01 | -0.15  | 0.021  |
|         |   | 3 | -.108* | 0.043 | 1.40E-02 | -0.193 | -0.023 |
|         |   | 4 | -0.039 | 0.044 | 3.77E-01 | -0.127 | 0.049  |
|         |   | 5 | 0.038  | 0.043 | 3.71E-01 | -0.047 | 0.124  |
|         |   | 6 | 0.003  | 0.043 | 9.38E-01 | -0.082 | 0.089  |
|         |   | 7 | -0.003 | 0.043 | 9.39E-01 | -0.089 | 0.082  |
|         |   | 9 | -0.032 | 0.043 | 4.60E-01 | -0.117 | 0.054  |
|         | 9 | 1 | -.385* | 0.043 | 9.41E-13 | -0.47  | -0.299 |
|         |   | 2 | -0.032 | 0.041 | 4.35E-01 | -0.115 | 0.05   |
|         |   | 3 | -0.076 | 0.041 | 6.93E-02 | -0.159 | 0.006  |
|         |   | 4 | -0.008 | 0.043 | 8.60E-01 | -0.093 | 0.078  |
|         |   | 5 | 0.07   | 0.041 | 9.40E-02 | -0.012 | 0.153  |
|         |   | 6 | 0.035  | 0.041 | 3.98E-01 | -0.047 | 0.118  |
|         |   | 7 | 0.028  | 0.041 | 4.93E-01 | -0.054 | 0.111  |
|         |   | 8 | 0.032  | 0.043 | 4.60E-01 | -0.054 | 0.117  |
| Tamhane | 1 | 2 | .352*  | 0.05  | 2.33E-03 | 0.124  | 0.581  |
|         |   | 3 | .308*  | 0.071 | 2.78E-02 | 0.023  | 0.594  |
|         |   | 4 | .377*  | 0.061 | 1.65E-03 | 0.127  | 0.627  |
|         |   | 5 | .455*  | 0.046 | 1.37E-03 | 0.211  | 0.699  |
|         |   | 6 | .420*  | 0.046 | 1.90E-03 | 0.179  | 0.661  |
|         |   | 7 | .413*  | 0.046 | 2.74E-03 | 0.167  | 0.659  |
|         |   | 8 | .416*  | 0.046 | 2.18E-03 | 0.174  | 0.659  |
|         |   | 9 | .385*  | 0.053 | 8.96E-04 | 0.156  | 0.614  |
|         | 2 | 1 | -.352* | 0.05  | 2.33E-03 | -0.581 | -0.124 |
|         |   | 3 | -0.044 | 0.059 | 1.00E+00 | -0.307 | 0.219  |
|         |   | 4 | 0.025  | 0.047 | 1.00E+00 | -0.181 | 0.23   |
|         |   | 5 | 0.103  | 0.025 | 8.23E-02 | -0.009 | 0.214  |
|         |   | 6 | 0.067  | 0.025 | 5.82E-01 | -0.043 | 0.178  |
|         |   | 7 | 0.061  | 0.024 | 7.11E-01 | -0.052 | 0.173  |
|         |   | 8 | 0.064  | 0.025 | 6.54E-01 | -0.047 | 0.175  |
|         |   | 9 | 0.032  | 0.036 | 1.00E+00 | -0.11  | 0.174  |
|         | 3 | 1 | -.308* | 0.071 | 2.78E-02 | -0.594 | -0.023 |
|         |   | 2 | 0.044  | 0.059 | 1.00E+00 | -0.219 | 0.307  |
|         |   | 4 | 0.069  | 0.068 | 1.00E+00 | -0.208 | 0.345  |
|         |   | 5 | 0.146  | 0.055 | 6.80E-01 | -0.127 | 0.419  |
|         |   | 6 | 0.111  | 0.055 | 9.54E-01 | -0.16  | 0.383  |
|         |   | 7 | 0.105  | 0.055 | 9.74E-01 | -0.169 | 0.379  |

|   |   |         |       |          |        |        |
|---|---|---------|-------|----------|--------|--------|
|   | 8 | 0.108   | 0.055 | 9.65E-01 | -0.164 | 0.38   |
|   | 9 | 0.076   | 0.061 | 1.00E+00 | -0.186 | 0.339  |
| 4 | 1 | -0.377* | 0.061 | 1.65E-03 | -0.627 | -0.127 |
|   | 2 | -0.025  | 0.047 | 1.00E+00 | -0.23  | 0.181  |
|   | 3 | -0.069  | 0.068 | 1.00E+00 | -0.345 | 0.208  |
|   | 5 | 0.078   | 0.041 | 9.82E-01 | -0.141 | 0.296  |
|   | 6 | 0.043   | 0.042 | 1.00E+00 | -0.173 | 0.258  |
|   | 7 | 0.036   | 0.041 | 1.00E+00 | -0.185 | 0.256  |
|   | 8 | 0.039   | 0.042 | 1.00E+00 | -0.178 | 0.256  |
|   | 9 | 0.008   | 0.049 | 1.00E+00 | -0.2   | 0.215  |
| 5 | 1 | -0.455* | 0.046 | 1.37E-03 | -0.699 | -0.211 |
|   | 2 | -0.103  | 0.025 | 8.23E-02 | -0.214 | 0.009  |
|   | 3 | -0.146  | 0.055 | 6.80E-01 | -0.419 | 0.127  |
|   | 4 | -0.078  | 0.041 | 9.82E-01 | -0.296 | 0.141  |
|   | 6 | -0.035  | 0.014 | 6.00E-01 | -0.091 | 0.021  |
|   | 7 | -0.042  | 0.011 | 8.56E-02 | -0.087 | 0.003  |
|   | 8 | -0.038  | 0.013 | 3.54E-01 | -0.092 | 0.015  |
|   | 9 | -0.07   | 0.029 | 7.54E-01 | -0.203 | 0.063  |
| 6 | 1 | -0.420* | 0.046 | 1.90E-03 | -0.661 | -0.179 |
|   | 2 | -0.067  | 0.025 | 5.82E-01 | -0.178 | 0.043  |
|   | 3 | -0.111  | 0.055 | 9.54E-01 | -0.383 | 0.16   |
|   | 4 | -0.043  | 0.042 | 1.00E+00 | -0.258 | 0.173  |
|   | 5 | 0.035   | 0.014 | 6.00E-01 | -0.021 | 0.091  |
|   | 7 | -0.007  | 0.013 | 1.00E+00 | -0.06  | 0.047  |
|   | 8 | -0.003  | 0.015 | 1.00E+00 | -0.062 | 0.055  |
|   | 9 | -0.035  | 0.029 | 1.00E+00 | -0.167 | 0.097  |
| 7 | 1 | -0.413* | 0.046 | 2.74E-03 | -0.659 | -0.167 |
|   | 2 | -0.061  | 0.024 | 7.11E-01 | -0.173 | 0.052  |
|   | 3 | -0.105  | 0.055 | 9.74E-01 | -0.379 | 0.169  |
|   | 4 | -0.036  | 0.041 | 1.00E+00 | -0.256 | 0.185  |
|   | 5 | 0.042   | 0.011 | 8.56E-02 | -0.003 | 0.087  |
|   | 6 | 0.007   | 0.013 | 1.00E+00 | -0.047 | 0.06   |
|   | 8 | 0.003   | 0.012 | 1.00E+00 | -0.047 | 0.054  |
|   | 9 | -0.028  | 0.028 | 1.00E+00 | -0.163 | 0.106  |
| 8 | 1 | -0.416* | 0.046 | 2.18E-03 | -0.659 | -0.174 |
|   | 2 | -0.064  | 0.025 | 6.54E-01 | -0.175 | 0.047  |
|   | 3 | -0.108  | 0.055 | 9.65E-01 | -0.38  | 0.164  |
|   | 4 | -0.039  | 0.042 | 1.00E+00 | -0.256 | 0.178  |
|   | 5 | 0.038   | 0.013 | 3.54E-01 | -0.015 | 0.092  |
|   | 6 | 0.003   | 0.015 | 1.00E+00 | -0.055 | 0.062  |
|   | 7 | -0.003  | 0.012 | 1.00E+00 | -0.054 | 0.047  |

|     |     |   |   |        |       |          |        |        |
|-----|-----|---|---|--------|-------|----------|--------|--------|
|     |     |   | 9 | -0.032 | 0.029 | 1.00E+00 | -0.164 | 0.101  |
|     |     | 9 | 1 | -.385* | 0.053 | 8.96E-04 | -0.614 | -0.156 |
|     |     |   | 2 | -0.032 | 0.036 | 1.00E+00 | -0.174 | 0.11   |
|     |     |   | 3 | -0.076 | 0.061 | 1.00E+00 | -0.339 | 0.186  |
|     |     |   | 4 | -0.008 | 0.049 | 1.00E+00 | -0.215 | 0.2    |
|     |     |   | 5 | 0.07   | 0.029 | 7.54E-01 | -0.063 | 0.203  |
|     |     |   | 6 | 0.035  | 0.029 | 1.00E+00 | -0.097 | 0.167  |
|     |     |   | 7 | 0.028  | 0.028 | 1.00E+00 | -0.106 | 0.163  |
|     |     |   | 8 | 0.032  | 0.029 | 1.00E+00 | -0.101 | 0.164  |
| Thr | LSD | 1 | 2 | .429*  | 0.057 | 3.51E-10 | 0.315  | 0.544  |
|     |     |   | 3 | .290*  | 0.057 | 4.14E-06 | 0.176  | 0.404  |
|     |     |   | 4 | .419*  | 0.059 | 1.74E-09 | 0.301  | 0.537  |
|     |     |   | 5 | .499*  | 0.057 | 2.95E-12 | 0.385  | 0.613  |
|     |     |   | 6 | .474*  | 0.057 | 1.68E-11 | 0.359  | 0.588  |
|     |     |   | 7 | .430*  | 0.057 | 3.33E-10 | 0.316  | 0.544  |
|     |     |   | 8 | .456*  | 0.059 | 1.50E-10 | 0.338  | 0.574  |
|     |     |   | 9 | .476*  | 0.057 | 1.42E-11 | 0.361  | 0.59   |
|     |     | 2 | 1 | -.429* | 0.057 | 3.51E-10 | -0.544 | -0.315 |
|     |     |   | 3 | -.139* | 0.055 | 1.45E-02 | -0.25  | -0.029 |
|     |     |   | 4 | -0.01  | 0.057 | 8.62E-01 | -0.124 | 0.104  |
|     |     |   | 5 | 0.07   | 0.055 | 2.12E-01 | -0.041 | 0.18   |
|     |     |   | 6 | 0.044  | 0.055 | 4.26E-01 | -0.066 | 0.155  |
|     |     |   | 7 | 0.001  | 0.055 | 9.89E-01 | -0.11  | 0.111  |
|     |     |   | 8 | 0.027  | 0.057 | 6.41E-01 | -0.088 | 0.141  |
|     |     |   | 9 | 0.047  | 0.055 | 4.02E-01 | -0.064 | 0.157  |
|     |     | 3 | 1 | -.290* | 0.057 | 4.14E-06 | -0.404 | -0.176 |
|     |     |   | 2 | .139*  | 0.055 | 1.45E-02 | 0.029  | 0.25   |
|     |     |   | 4 | .129*  | 0.057 | 2.76E-02 | 0.015  | 0.244  |
|     |     |   | 5 | .209*  | 0.055 | 3.63E-04 | 0.098  | 0.32   |
|     |     |   | 6 | .184*  | 0.055 | 1.54E-03 | 0.073  | 0.294  |
|     |     |   | 7 | .140*  | 0.055 | 1.40E-02 | 0.029  | 0.251  |
|     |     |   | 8 | .166*  | 0.057 | 5.17E-03 | 0.052  | 0.281  |
|     |     |   | 9 | .186*  | 0.055 | 1.35E-03 | 0.075  | 0.297  |
|     |     | 4 | 1 | -.419* | 0.059 | 1.74E-09 | -0.537 | -0.301 |
|     |     |   | 2 | 0.01   | 0.057 | 8.62E-01 | -0.104 | 0.124  |
|     |     |   | 3 | -.129* | 0.057 | 2.76E-02 | -0.244 | -0.015 |
|     |     |   | 5 | 0.08   | 0.057 | 1.69E-01 | -0.035 | 0.194  |
|     |     |   | 6 | 0.054  | 0.057 | 3.47E-01 | -0.06  | 0.169  |
|     |     |   | 7 | 0.011  | 0.057 | 8.52E-01 | -0.104 | 0.125  |
|     |     |   | 8 | 0.037  | 0.059 | 5.35E-01 | -0.081 | 0.155  |
|     |     |   | 9 | 0.057  | 0.057 | 3.26E-01 | -0.058 | 0.171  |

|         |   |         |         |          |          |        |        |
|---------|---|---------|---------|----------|----------|--------|--------|
| 5       | 1 | -0.499* | 0.057   | 2.95E-12 | -0.613   | -0.385 |        |
|         | 2 | -0.07   | 0.055   | 2.12E-01 | -0.18    | 0.041  |        |
|         | 3 | -0.209* | 0.055   | 3.63E-04 | -0.32    | -0.098 |        |
|         | 4 | -0.08   | 0.057   | 1.69E-01 | -0.194   | 0.035  |        |
|         | 6 | -0.025  | 0.055   | 6.47E-01 | -0.136   | 0.085  |        |
|         | 7 | -0.069  | 0.055   | 2.17E-01 | -0.18    | 0.042  |        |
|         | 8 | -0.043  | 0.057   | 4.57E-01 | -0.157   | 0.072  |        |
|         | 9 | -0.023  | 0.055   | 6.78E-01 | -0.134   | 0.088  |        |
|         | 6 | 1       | -0.474* | 0.057    | 1.68E-11 | -0.588 | -0.359 |
| 2       |   | -0.044  | 0.055   | 4.26E-01 | -0.155   | 0.066  |        |
| 3       |   | -0.184* | 0.055   | 1.54E-03 | -0.294   | -0.073 |        |
| 4       |   | -0.054  | 0.057   | 3.47E-01 | -0.169   | 0.06   |        |
| 5       |   | 0.025   | 0.055   | 6.47E-01 | -0.085   | 0.136  |        |
| 7       |   | -0.044  | 0.055   | 4.34E-01 | -0.154   | 0.067  |        |
| 8       |   | -0.017  | 0.057   | 7.62E-01 | -0.132   | 0.097  |        |
| 9       |   | 0.002   | 0.055   | 9.65E-01 | -0.108   | 0.113  |        |
| 7       |   | 1       | -0.430* | 0.057    | 3.33E-10 | -0.544 | -0.316 |
|         | 2 | -0.001  | 0.055   | 9.89E-01 | -0.111   | 0.11   |        |
|         | 3 | -0.140* | 0.055   | 1.40E-02 | -0.251   | -0.029 |        |
|         | 4 | -0.011  | 0.057   | 8.52E-01 | -0.125   | 0.104  |        |
|         | 5 | 0.069   | 0.055   | 2.17E-01 | -0.042   | 0.18   |        |
|         | 6 | 0.044   | 0.055   | 4.34E-01 | -0.067   | 0.154  |        |
|         | 8 | 0.026   | 0.057   | 6.50E-01 | -0.088   | 0.141  |        |
|         | 9 | 0.046   | 0.055   | 4.09E-01 | -0.065   | 0.157  |        |
|         | 8 | 1       | -0.456* | 0.059    | 1.50E-10 | -0.574 | -0.338 |
| 2       |   | -0.027  | 0.057   | 6.41E-01 | -0.141   | 0.088  |        |
| 3       |   | -0.166* | 0.057   | 5.17E-03 | -0.281   | -0.052 |        |
| 4       |   | -0.037  | 0.059   | 5.35E-01 | -0.155   | 0.081  |        |
| 5       |   | 0.043   | 0.057   | 4.57E-01 | -0.072   | 0.157  |        |
| 6       |   | 0.017   | 0.057   | 7.62E-01 | -0.097   | 0.132  |        |
| 7       |   | -0.026  | 0.057   | 6.50E-01 | -0.141   | 0.088  |        |
| 9       |   | 0.02    | 0.057   | 7.30E-01 | -0.095   | 0.134  |        |
| 9       |   | 1       | -0.476* | 0.057    | 1.42E-11 | -0.59  | -0.361 |
|         | 2 | -0.047  | 0.055   | 4.02E-01 | -0.157   | 0.064  |        |
|         | 3 | -0.186* | 0.055   | 1.35E-03 | -0.297   | -0.075 |        |
|         | 4 | -0.057  | 0.057   | 3.26E-01 | -0.171   | 0.058  |        |
|         | 5 | 0.023   | 0.055   | 6.78E-01 | -0.088   | 0.134  |        |
|         | 6 | -0.002  | 0.055   | 9.65E-01 | -0.113   | 0.108  |        |
|         | 7 | -0.046  | 0.055   | 4.09E-01 | -0.157   | 0.065  |        |
|         | 8 | -0.02   | 0.057   | 7.30E-01 | -0.134   | 0.095  |        |
| Tamhane | 1 | 2       | .429*   | 0.043    | 5.92E-04 | 0.215  | 0.644  |

|   |   |        |       |          |        |        |
|---|---|--------|-------|----------|--------|--------|
|   | 3 | 0.29   | 0.103 | 5.08E-01 | -0.169 | 0.749  |
|   | 4 | .419*  | 0.051 | 1.77E-04 | 0.203  | 0.635  |
|   | 5 | .499*  | 0.044 | 1.51E-04 | 0.287  | 0.711  |
|   | 6 | .474*  | 0.045 | 1.33E-04 | 0.264  | 0.683  |
|   | 7 | .430*  | 0.045 | 2.85E-04 | 0.221  | 0.639  |
|   | 8 | .456*  | 0.044 | 2.64E-04 | 0.244  | 0.668  |
|   | 9 | .476*  | 0.05  | 4.52E-05 | 0.266  | 0.686  |
| 2 | 1 | -.429* | 0.043 | 5.92E-04 | -0.644 | -0.215 |
|   | 3 | -0.139 | 0.096 | 9.99E-01 | -0.616 | 0.338  |
|   | 4 | -0.01  | 0.034 | 1.00E+00 | -0.168 | 0.148  |
|   | 5 | 0.07   | 0.021 | 1.61E-01 | -0.013 | 0.153  |
|   | 6 | 0.044  | 0.023 | 9.54E-01 | -0.051 | 0.139  |
|   | 7 | 0.001  | 0.023 | 1.00E+00 | -0.094 | 0.096  |
|   | 8 | 0.027  | 0.021 | 1.00E+00 | -0.061 | 0.115  |
|   | 9 | 0.047  | 0.031 | 9.98E-01 | -0.087 | 0.181  |
| 3 | 1 | -0.29  | 0.103 | 5.08E-01 | -0.749 | 0.169  |
|   | 2 | 0.139  | 0.096 | 9.99E-01 | -0.338 | 0.616  |
|   | 4 | 0.129  | 0.1   | 1.00E+00 | -0.334 | 0.593  |
|   | 5 | 0.209  | 0.096 | 9.08E-01 | -0.267 | 0.685  |
|   | 6 | 0.184  | 0.097 | 9.74E-01 | -0.289 | 0.656  |
|   | 7 | 0.14   | 0.097 | 9.99E-01 | -0.333 | 0.613  |
|   | 8 | 0.166  | 0.096 | 9.92E-01 | -0.309 | 0.641  |
|   | 9 | 0.186  | 0.099 | 9.73E-01 | -0.28  | 0.652  |
| 4 | 1 | -.419* | 0.051 | 1.77E-04 | -0.635 | -0.203 |
|   | 2 | 0.01   | 0.034 | 1.00E+00 | -0.148 | 0.168  |
|   | 3 | -0.129 | 0.1   | 1.00E+00 | -0.593 | 0.334  |
|   | 5 | 0.08   | 0.035 | 8.20E-01 | -0.077 | 0.236  |
|   | 6 | 0.054  | 0.036 | 9.99E-01 | -0.103 | 0.211  |
|   | 7 | 0.011  | 0.036 | 1.00E+00 | -0.146 | 0.168  |
|   | 8 | 0.037  | 0.035 | 1.00E+00 | -0.12  | 0.194  |
|   | 9 | 0.057  | 0.041 | 1.00E+00 | -0.112 | 0.225  |
| 5 | 1 | -.499* | 0.044 | 1.51E-04 | -0.711 | -0.287 |
|   | 2 | -0.07  | 0.021 | 1.61E-01 | -0.153 | 0.013  |
|   | 3 | -0.209 | 0.096 | 9.08E-01 | -0.685 | 0.267  |
|   | 4 | -0.08  | 0.035 | 8.20E-01 | -0.236 | 0.077  |
|   | 6 | -0.025 | 0.025 | 1.00E+00 | -0.124 | 0.073  |
|   | 7 | -0.069 | 0.025 | 4.14E-01 | -0.168 | 0.03   |
|   | 8 | -0.043 | 0.023 | 9.56E-01 | -0.135 | 0.05   |
|   | 9 | -0.023 | 0.032 | 1.00E+00 | -0.157 | 0.111  |
| 6 | 1 | -.474* | 0.045 | 1.33E-04 | -0.683 | -0.264 |
|   | 2 | -0.044 | 0.023 | 9.54E-01 | -0.139 | 0.051  |

|     |     |   |   |         |       |          |        |        |
|-----|-----|---|---|---------|-------|----------|--------|--------|
|     |     |   | 3 | -0.184  | 0.097 | 9.74E-01 | -0.656 | 0.289  |
|     |     |   | 4 | -0.054  | 0.036 | 9.99E-01 | -0.211 | 0.103  |
|     |     |   | 5 | 0.025   | 0.025 | 1.00E+00 | -0.073 | 0.124  |
|     |     |   | 7 | -0.044  | 0.027 | 9.93E-01 | -0.15  | 0.063  |
|     |     |   | 8 | -0.017  | 0.025 | 1.00E+00 | -0.119 | 0.085  |
|     |     |   | 9 | 0.002   | 0.034 | 1.00E+00 | -0.135 | 0.14   |
|     |     | 7 | 1 | -0.430* | 0.045 | 2.85E-04 | -0.639 | -0.221 |
|     |     |   | 2 | -0.001  | 0.023 | 1.00E+00 | -0.096 | 0.094  |
|     |     |   | 3 | -0.14   | 0.097 | 9.99E-01 | -0.613 | 0.333  |
|     |     |   | 4 | -0.011  | 0.036 | 1.00E+00 | -0.168 | 0.146  |
|     |     |   | 5 | 0.069   | 0.025 | 4.14E-01 | -0.03  | 0.168  |
|     |     |   | 6 | 0.044   | 0.027 | 9.93E-01 | -0.063 | 0.15   |
|     |     |   | 8 | 0.026   | 0.025 | 1.00E+00 | -0.076 | 0.128  |
|     |     |   | 9 | 0.046   | 0.034 | 1.00E+00 | -0.091 | 0.183  |
|     |     | 8 | 1 | -0.456* | 0.044 | 2.64E-04 | -0.668 | -0.244 |
|     |     |   | 2 | -0.027  | 0.021 | 1.00E+00 | -0.115 | 0.061  |
|     |     |   | 3 | -0.166  | 0.096 | 9.92E-01 | -0.641 | 0.309  |
|     |     |   | 4 | -0.037  | 0.035 | 1.00E+00 | -0.194 | 0.12   |
|     |     |   | 5 | 0.043   | 0.023 | 9.56E-01 | -0.05  | 0.135  |
|     |     |   | 6 | 0.017   | 0.025 | 1.00E+00 | -0.085 | 0.119  |
|     |     |   | 7 | -0.026  | 0.025 | 1.00E+00 | -0.128 | 0.076  |
|     |     |   | 9 | 0.02    | 0.032 | 1.00E+00 | -0.116 | 0.156  |
|     |     | 9 | 1 | -0.476* | 0.05  | 4.52E-05 | -0.686 | -0.266 |
|     |     |   | 2 | -0.047  | 0.031 | 9.98E-01 | -0.181 | 0.087  |
|     |     |   | 3 | -0.186  | 0.099 | 9.73E-01 | -0.652 | 0.28   |
|     |     |   | 4 | -0.057  | 0.041 | 1.00E+00 | -0.225 | 0.112  |
|     |     |   | 5 | 0.023   | 0.032 | 1.00E+00 | -0.111 | 0.157  |
|     |     |   | 6 | -0.002  | 0.034 | 1.00E+00 | -0.14  | 0.135  |
|     |     |   | 7 | -0.046  | 0.034 | 1.00E+00 | -0.183 | 0.091  |
|     |     |   | 8 | -0.02   | 0.032 | 1.00E+00 | -0.156 | 0.116  |
| Tau | LSD | 1 | 2 | 0.008   | 0.035 | 8.11E-01 | -0.062 | 0.079  |
|     |     |   | 3 | -0.048  | 0.035 | 1.73E-01 | -0.119 | 0.022  |
|     |     |   | 4 | -0.041  | 0.036 | 2.61E-01 | -0.114 | 0.031  |
|     |     |   | 5 | -0.107* | 0.035 | 3.51E-03 | -0.177 | -0.036 |
|     |     |   | 6 | -0.062  | 0.035 | 8.48E-02 | -0.132 | 0.009  |
|     |     |   | 7 | -0.062  | 0.035 | 8.40E-02 | -0.132 | 0.009  |
|     |     |   | 8 | -0.053  | 0.036 | 1.52E-01 | -0.125 | 0.02   |
|     |     |   | 9 | 0.019   | 0.035 | 5.88E-01 | -0.051 | 0.089  |
|     |     | 2 | 1 | -0.008  | 0.035 | 8.11E-01 | -0.079 | 0.062  |
|     |     |   | 3 | -0.057  | 0.034 | 9.91E-02 | -0.125 | 0.011  |
|     |     |   | 4 | -0.05   | 0.035 | 1.63E-01 | -0.12  | 0.021  |

---

|   |   |        |       |          |        |        |
|---|---|--------|-------|----------|--------|--------|
|   | 5 | -.115* | 0.034 | 1.22E-03 | -0.183 | -0.047 |
|   | 6 | -.070* | 0.034 | 4.34E-02 | -0.138 | -0.002 |
|   | 7 | -.070* | 0.034 | 4.30E-02 | -0.138 | -0.002 |
|   | 8 | -0.061 | 0.035 | 8.74E-02 | -0.131 | 0.009  |
|   | 9 | 0.011  | 0.034 | 7.54E-01 | -0.057 | 0.078  |
| 3 | 1 | 0.048  | 0.035 | 1.73E-01 | -0.022 | 0.119  |
|   | 2 | 0.057  | 0.034 | 9.91E-02 | -0.011 | 0.125  |
|   | 4 | 0.007  | 0.035 | 8.38E-01 | -0.063 | 0.077  |
|   | 5 | -0.058 | 0.034 | 9.07E-02 | -0.126 | 0.01   |
|   | 6 | -0.013 | 0.034 | 7.00E-01 | -0.081 | 0.055  |
|   | 7 | -0.013 | 0.034 | 6.96E-01 | -0.081 | 0.055  |
|   | 8 | -0.004 | 0.035 | 9.05E-01 | -0.074 | 0.066  |
|   | 9 | 0.067  | 0.034 | 5.12E-02 | 0      | 0.135  |
| 4 | 1 | 0.041  | 0.036 | 2.61E-01 | -0.031 | 0.114  |
|   | 2 | 0.05   | 0.035 | 1.63E-01 | -0.021 | 0.12   |
|   | 3 | -0.007 | 0.035 | 8.38E-01 | -0.077 | 0.063  |
|   | 5 | -0.066 | 0.035 | 6.68E-02 | -0.136 | 0.005  |
|   | 6 | -0.02  | 0.035 | 5.64E-01 | -0.091 | 0.05   |
|   | 7 | -0.021 | 0.035 | 5.61E-01 | -0.091 | 0.05   |
|   | 8 | -0.011 | 0.036 | 7.54E-01 | -0.084 | 0.061  |
|   | 9 | 0.06   | 0.035 | 9.13E-02 | -0.01  | 0.13   |
| 5 | 1 | .107*  | 0.035 | 3.51E-03 | 0.036  | 0.177  |
|   | 2 | .115*  | 0.034 | 1.22E-03 | 0.047  | 0.183  |
|   | 3 | 0.058  | 0.034 | 9.07E-02 | -0.01  | 0.126  |
|   | 4 | 0.066  | 0.035 | 6.68E-02 | -0.005 | 0.136  |
|   | 6 | 0.045  | 0.034 | 1.88E-01 | -0.023 | 0.113  |
|   | 7 | 0.045  | 0.034 | 1.90E-01 | -0.023 | 0.113  |
|   | 8 | 0.054  | 0.035 | 1.29E-01 | -0.016 | 0.124  |
|   | 9 | .126*  | 0.034 | 4.57E-04 | 0.058  | 0.194  |
| 6 | 1 | 0.062  | 0.035 | 8.48E-02 | -0.009 | 0.132  |
|   | 2 | .070*  | 0.034 | 4.34E-02 | 0.002  | 0.138  |
|   | 3 | 0.013  | 0.034 | 7.00E-01 | -0.055 | 0.081  |
|   | 4 | 0.02   | 0.035 | 5.64E-01 | -0.05  | 0.091  |
|   | 5 | -0.045 | 0.034 | 1.88E-01 | -0.113 | 0.023  |
|   | 7 | 0      | 0.034 | 9.96E-01 | -0.068 | 0.068  |
|   | 8 | 0.009  | 0.035 | 7.99E-01 | -0.061 | 0.079  |
|   | 9 | .081*  | 0.034 | 2.06E-02 | 0.013  | 0.148  |
| 7 | 1 | 0.062  | 0.035 | 8.40E-02 | -0.009 | 0.132  |
|   | 2 | .070*  | 0.034 | 4.30E-02 | 0.002  | 0.138  |
|   | 3 | 0.013  | 0.034 | 6.96E-01 | -0.055 | 0.081  |
|   | 4 | 0.021  | 0.035 | 5.61E-01 | -0.05  | 0.091  |

---

|         |   |   |        |       |          |        |        |
|---------|---|---|--------|-------|----------|--------|--------|
|         |   | 5 | -0.045 | 0.034 | 1.90E-01 | -0.113 | 0.023  |
|         |   | 6 | 0      | 0.034 | 9.96E-01 | -0.068 | 0.068  |
|         |   | 8 | 0.009  | 0.035 | 7.96E-01 | -0.061 | 0.079  |
|         |   | 9 | .081*  | 0.034 | 2.04E-02 | 0.013  | 0.149  |
|         | 8 | 1 | 0.053  | 0.036 | 1.52E-01 | -0.02  | 0.125  |
|         |   | 2 | 0.061  | 0.035 | 8.74E-02 | -0.009 | 0.131  |
|         |   | 3 | 0.004  | 0.035 | 9.05E-01 | -0.066 | 0.074  |
|         |   | 4 | 0.011  | 0.036 | 7.54E-01 | -0.061 | 0.084  |
|         |   | 5 | -0.054 | 0.035 | 1.29E-01 | -0.124 | 0.016  |
|         |   | 6 | -0.009 | 0.035 | 7.99E-01 | -0.079 | 0.061  |
|         |   | 7 | -0.009 | 0.035 | 7.96E-01 | -0.079 | 0.061  |
|         |   | 9 | .072*  | 0.035 | 4.56E-02 | 0.001  | 0.142  |
|         | 9 | 1 | -0.019 | 0.035 | 5.88E-01 | -0.089 | 0.051  |
|         |   | 2 | -0.011 | 0.034 | 7.54E-01 | -0.078 | 0.057  |
|         |   | 3 | -0.067 | 0.034 | 5.12E-02 | -0.135 | 0      |
|         |   | 4 | -0.06  | 0.035 | 9.13E-02 | -0.13  | 0.01   |
|         |   | 5 | -.126* | 0.034 | 4.57E-04 | -0.194 | -0.058 |
|         |   | 6 | -.081* | 0.034 | 2.06E-02 | -0.148 | -0.013 |
|         |   | 7 | -.081* | 0.034 | 2.04E-02 | -0.149 | -0.013 |
|         |   | 8 | -.072* | 0.035 | 4.56E-02 | -0.142 | -0.001 |
| Tamhane | 1 | 2 | 0.008  | 0.025 | 1.00E+00 | -0.103 | 0.12   |
|         |   | 3 | -0.048 | 0.027 | 9.76E-01 | -0.161 | 0.065  |
|         |   | 4 | -0.041 | 0.034 | 1.00E+00 | -0.18  | 0.098  |
|         |   | 5 | -0.107 | 0.057 | 9.69E-01 | -0.361 | 0.147  |
|         |   | 6 | -0.062 | 0.029 | 8.65E-01 | -0.18  | 0.057  |
|         |   | 7 | -0.062 | 0.028 | 8.31E-01 | -0.177 | 0.054  |
|         |   | 8 | -0.053 | 0.028 | 9.58E-01 | -0.169 | 0.064  |
|         |   | 9 | 0.019  | 0.024 | 1.00E+00 | -0.094 | 0.132  |
|         | 2 | 1 | -0.008 | 0.025 | 1.00E+00 | -0.12  | 0.103  |
|         |   | 3 | -0.057 | 0.019 | 3.42E-01 | -0.135 | 0.021  |
|         |   | 4 | -0.05  | 0.028 | 9.86E-01 | -0.179 | 0.08   |
|         |   | 5 | -0.115 | 0.054 | 9.14E-01 | -0.375 | 0.145  |
|         |   | 6 | -0.07  | 0.022 | 2.67E-01 | -0.162 | 0.022  |
|         |   | 7 | -0.07  | 0.021 | 1.88E-01 | -0.156 | 0.016  |
|         |   | 8 | -0.061 | 0.021 | 3.84E-01 | -0.149 | 0.027  |
|         |   | 9 | 0.011  | 0.015 | 1.00E+00 | -0.05  | 0.071  |
|         | 3 | 1 | 0.048  | 0.027 | 9.76E-01 | -0.065 | 0.161  |
|         |   | 2 | 0.057  | 0.019 | 3.42E-01 | -0.021 | 0.135  |
|         |   | 4 | 0.007  | 0.03  | 1.00E+00 | -0.122 | 0.136  |
|         |   | 5 | -0.058 | 0.055 | 1.00E+00 | -0.316 | 0.199  |
|         |   | 6 | -0.013 | 0.024 | 1.00E+00 | -0.11  | 0.084  |



---

|   |   |        |       |          |        |       |
|---|---|--------|-------|----------|--------|-------|
|   | 7 | -0.013 | 0.023 | 1.00E+00 | -0.105 | 0.079 |
|   | 8 | -0.004 | 0.023 | 1.00E+00 | -0.097 | 0.089 |
|   | 9 | 0.067  | 0.018 | 9.96E-02 | -0.007 | 0.142 |
| 4 | 1 | 0.041  | 0.034 | 1.00E+00 | -0.098 | 0.18  |
|   | 2 | 0.05   | 0.028 | 9.86E-01 | -0.08  | 0.179 |
|   | 3 | -0.007 | 0.03  | 1.00E+00 | -0.136 | 0.122 |
|   | 5 | -0.066 | 0.058 | 1.00E+00 | -0.319 | 0.188 |
|   | 6 | -0.02  | 0.032 | 1.00E+00 | -0.152 | 0.111 |
|   | 7 | -0.021 | 0.031 | 1.00E+00 | -0.151 | 0.11  |
|   | 8 | -0.011 | 0.03  | 1.00E+00 | -0.142 | 0.119 |
|   | 9 | 0.06   | 0.027 | 8.82E-01 | -0.071 | 0.192 |
| 5 | 1 | 0.107  | 0.057 | 9.69E-01 | -0.147 | 0.361 |
|   | 2 | 0.115  | 0.054 | 9.14E-01 | -0.145 | 0.375 |
|   | 3 | 0.058  | 0.055 | 1.00E+00 | -0.199 | 0.316 |
|   | 4 | 0.066  | 0.058 | 1.00E+00 | -0.188 | 0.319 |
|   | 6 | 0.045  | 0.056 | 1.00E+00 | -0.21  | 0.3   |
|   | 7 | 0.045  | 0.055 | 1.00E+00 | -0.211 | 0.301 |
|   | 8 | 0.054  | 0.055 | 1.00E+00 | -0.202 | 0.31  |
|   | 9 | 0.126  | 0.053 | 8.31E-01 | -0.137 | 0.388 |
| 6 | 1 | 0.062  | 0.029 | 8.65E-01 | -0.057 | 0.18  |
|   | 2 | 0.07   | 0.022 | 2.67E-01 | -0.022 | 0.162 |
|   | 3 | 0.013  | 0.024 | 1.00E+00 | -0.084 | 0.11  |
|   | 4 | 0.02   | 0.032 | 1.00E+00 | -0.111 | 0.152 |
|   | 5 | -0.045 | 0.056 | 1.00E+00 | -0.3   | 0.21  |
|   | 7 | 0      | 0.026 | 1.00E+00 | -0.102 | 0.101 |
|   | 8 | 0.009  | 0.025 | 1.00E+00 | -0.093 | 0.111 |
|   | 9 | 0.081  | 0.021 | 1.06E-01 | -0.01  | 0.171 |
| 7 | 1 | 0.062  | 0.028 | 8.31E-01 | -0.054 | 0.177 |
|   | 2 | 0.07   | 0.021 | 1.88E-01 | -0.016 | 0.156 |
|   | 3 | 0.013  | 0.023 | 1.00E+00 | -0.079 | 0.105 |
|   | 4 | 0.021  | 0.031 | 1.00E+00 | -0.11  | 0.151 |
|   | 5 | -0.045 | 0.055 | 1.00E+00 | -0.301 | 0.211 |
|   | 6 | 0      | 0.026 | 1.00E+00 | -0.101 | 0.102 |
|   | 8 | 0.009  | 0.024 | 1.00E+00 | -0.089 | 0.107 |
|   | 9 | 0.081  | 0.02  | 6.55E-02 | -0.003 | 0.165 |
| 8 | 1 | 0.053  | 0.028 | 9.58E-01 | -0.064 | 0.169 |
|   | 2 | 0.061  | 0.021 | 3.84E-01 | -0.027 | 0.149 |
|   | 3 | 0.004  | 0.023 | 1.00E+00 | -0.089 | 0.097 |
|   | 4 | 0.011  | 0.03  | 1.00E+00 | -0.119 | 0.142 |
|   | 5 | -0.054 | 0.055 | 1.00E+00 | -0.31  | 0.202 |
|   | 6 | -0.009 | 0.025 | 1.00E+00 | -0.111 | 0.093 |

---

|     |     |   |   |        |       |          |        |        |
|-----|-----|---|---|--------|-------|----------|--------|--------|
|     |     |   | 7 | -0.009 | 0.024 | 1.00E+00 | -0.107 | 0.089  |
|     |     |   | 9 | 0.072  | 0.019 | 1.53E-01 | -0.015 | 0.158  |
|     |     | 9 | 1 | -0.019 | 0.024 | 1.00E+00 | -0.132 | 0.094  |
|     |     |   | 2 | -0.011 | 0.015 | 1.00E+00 | -0.071 | 0.05   |
|     |     |   | 3 | -0.067 | 0.018 | 9.96E-02 | -0.142 | 0.007  |
|     |     |   | 4 | -0.06  | 0.027 | 8.82E-01 | -0.192 | 0.071  |
|     |     |   | 5 | -0.126 | 0.053 | 8.31E-01 | -0.388 | 0.137  |
|     |     |   | 6 | -0.081 | 0.021 | 1.06E-01 | -0.171 | 0.01   |
|     |     |   | 7 | -0.081 | 0.02  | 6.55E-02 | -0.165 | 0.003  |
|     |     |   | 8 | -0.072 | 0.019 | 1.53E-01 | -0.158 | 0.015  |
| GPC | LSD | 1 | 2 | -0.026 | 0.066 | 6.94E-01 | -0.158 | 0.106  |
|     |     |   | 3 | 0.131  | 0.066 | 5.15E-02 | -0.001 | 0.263  |
|     |     |   | 4 | .136*  | 0.068 | 4.98E-02 | 0      | 0.272  |
|     |     |   | 5 | -0.112 | 0.066 | 9.50E-02 | -0.244 | 0.02   |
|     |     |   | 6 | .138*  | 0.066 | 3.98E-02 | 0.007  | 0.27   |
|     |     |   | 7 | 0.125  | 0.066 | 6.29E-02 | -0.007 | 0.257  |
|     |     |   | 8 | .151*  | 0.068 | 3.06E-02 | 0.015  | 0.287  |
|     |     |   | 9 | .162*  | 0.066 | 1.66E-02 | 0.031  | 0.294  |
|     |     | 2 | 1 | 0.026  | 0.066 | 6.94E-01 | -0.106 | 0.158  |
|     |     |   | 3 | .157*  | 0.064 | 1.66E-02 | 0.03   | 0.284  |
|     |     |   | 4 | .162*  | 0.066 | 1.67E-02 | 0.03   | 0.294  |
|     |     |   | 5 | -0.086 | 0.064 | 1.83E-01 | -0.213 | 0.042  |
|     |     |   | 6 | .165*  | 0.064 | 1.22E-02 | 0.037  | 0.292  |
|     |     |   | 7 | .151*  | 0.064 | 2.10E-02 | 0.024  | 0.278  |
|     |     |   | 8 | .177*  | 0.066 | 9.45E-03 | 0.045  | 0.309  |
|     |     |   | 9 | .189*  | 0.064 | 4.39E-03 | 0.061  | 0.316  |
|     |     | 3 | 1 | -0.131 | 0.066 | 5.15E-02 | -0.263 | 0.001  |
|     |     |   | 2 | -.157* | 0.064 | 1.66E-02 | -0.284 | -0.03  |
|     |     |   | 4 | 0.005  | 0.066 | 9.36E-01 | -0.126 | 0.137  |
|     |     |   | 5 | -.243* | 0.064 | 3.27E-04 | -0.37  | -0.115 |
|     |     |   | 6 | 0.008  | 0.064 | 9.06E-01 | -0.12  | 0.135  |
|     |     |   | 7 | -0.006 | 0.064 | 9.25E-01 | -0.133 | 0.121  |
|     |     |   | 8 | 0.02   | 0.066 | 7.65E-01 | -0.112 | 0.152  |
|     |     |   | 9 | 0.032  | 0.064 | 6.22E-01 | -0.096 | 0.159  |
|     |     | 4 | 1 | -.136* | 0.068 | 4.98E-02 | -0.272 | 0      |
|     |     |   | 2 | -.162* | 0.066 | 1.67E-02 | -0.294 | -0.03  |
|     |     |   | 3 | -0.005 | 0.066 | 9.36E-01 | -0.137 | 0.126  |
|     |     |   | 5 | -.248* | 0.066 | 3.83E-04 | -0.38  | -0.116 |
|     |     |   | 6 | 0.002  | 0.066 | 9.73E-01 | -0.13  | 0.134  |
|     |     |   | 7 | -0.011 | 0.066 | 8.63E-01 | -0.143 | 0.12   |
|     |     |   | 8 | 0.014  | 0.068 | 8.33E-01 | -0.122 | 0.151  |

---

|   |   |        |       |          |        |        |
|---|---|--------|-------|----------|--------|--------|
|   | 9 | 0.026  | 0.066 | 6.92E-01 | -0.106 | 0.158  |
| 5 | 1 | 0.112  | 0.066 | 9.50E-02 | -0.02  | 0.244  |
|   | 2 | 0.086  | 0.064 | 1.83E-01 | -0.042 | 0.213  |
|   | 3 | .243*  | 0.064 | 3.27E-04 | 0.115  | 0.37   |
|   | 4 | .248*  | 0.066 | 3.83E-04 | 0.116  | 0.38   |
|   | 6 | .250*  | 0.064 | 2.22E-04 | 0.123  | 0.378  |
|   | 7 | .237*  | 0.064 | 4.45E-04 | 0.109  | 0.364  |
|   | 8 | .262*  | 0.066 | 1.87E-04 | 0.131  | 0.394  |
|   | 9 | .274*  | 0.064 | 6.21E-05 | 0.147  | 0.402  |
| 6 | 1 | -.138* | 0.066 | 3.98E-02 | -0.27  | -0.007 |
|   | 2 | -.165* | 0.064 | 1.22E-02 | -0.292 | -0.037 |
|   | 3 | -0.008 | 0.064 | 9.06E-01 | -0.135 | 0.12   |
|   | 4 | -0.002 | 0.066 | 9.73E-01 | -0.134 | 0.13   |
|   | 5 | -.250* | 0.064 | 2.22E-04 | -0.378 | -0.123 |
|   | 7 | -0.014 | 0.064 | 8.31E-01 | -0.141 | 0.114  |
|   | 8 | 0.012  | 0.066 | 8.54E-01 | -0.12  | 0.144  |
|   | 9 | 0.024  | 0.064 | 7.08E-01 | -0.103 | 0.151  |
| 7 | 1 | -0.125 | 0.066 | 6.29E-02 | -0.257 | 0.007  |
|   | 2 | -.151* | 0.064 | 2.10E-02 | -0.278 | -0.024 |
|   | 3 | 0.006  | 0.064 | 9.25E-01 | -0.121 | 0.133  |
|   | 4 | 0.011  | 0.066 | 8.63E-01 | -0.12  | 0.143  |
|   | 5 | -.237* | 0.064 | 4.45E-04 | -0.364 | -0.109 |
|   | 6 | 0.014  | 0.064 | 8.31E-01 | -0.114 | 0.141  |
|   | 8 | 0.026  | 0.066 | 6.97E-01 | -0.106 | 0.158  |
|   | 9 | 0.038  | 0.064 | 5.57E-01 | -0.09  | 0.165  |
| 8 | 1 | -.151* | 0.068 | 3.06E-02 | -0.287 | -0.015 |
|   | 2 | -.177* | 0.066 | 9.45E-03 | -0.309 | -0.045 |
|   | 3 | -0.02  | 0.066 | 7.65E-01 | -0.152 | 0.112  |
|   | 4 | -0.014 | 0.068 | 8.33E-01 | -0.151 | 0.122  |
|   | 5 | -.262* | 0.066 | 1.87E-04 | -0.394 | -0.131 |
|   | 6 | -0.012 | 0.066 | 8.54E-01 | -0.144 | 0.12   |
|   | 7 | -0.026 | 0.066 | 6.97E-01 | -0.158 | 0.106  |
|   | 9 | 0.012  | 0.066 | 8.59E-01 | -0.12  | 0.144  |
| 9 | 1 | -.162* | 0.066 | 1.66E-02 | -0.294 | -0.031 |
|   | 2 | -.189* | 0.064 | 4.39E-03 | -0.316 | -0.061 |
|   | 3 | -0.032 | 0.064 | 6.22E-01 | -0.159 | 0.096  |
|   | 4 | -0.026 | 0.066 | 6.92E-01 | -0.158 | 0.106  |
|   | 5 | -.274* | 0.064 | 6.21E-05 | -0.402 | -0.147 |
|   | 6 | -0.024 | 0.064 | 7.08E-01 | -0.151 | 0.103  |
|   | 7 | -0.038 | 0.064 | 5.57E-01 | -0.165 | 0.09   |
|   | 8 | -0.012 | 0.066 | 8.59E-01 | -0.144 | 0.12   |

---

|         |        |   |        |        |          |          |          |
|---------|--------|---|--------|--------|----------|----------|----------|
| Tamhane | 1      | 2 | -0.026 | 0.09   | 1.00E+00 | -0.401   | 0.349    |
|         |        | 3 | 0.131  | 0.051  | 7.49E-01 | -0.13    | 0.392    |
|         |        | 4 | 0.136  | 0.053  | 7.10E-01 | -0.117   | 0.389    |
|         |        | 5 | -0.112 | 0.103  | 1.00E+00 | -0.549   | 0.325    |
|         |        | 6 | 0.138  | 0.05   | 6.70E-01 | -0.126   | 0.403    |
|         |        | 7 | 0.125  | 0.053  | 8.21E-01 | -0.129   | 0.378    |
|         |        | 8 | 0.151  | 0.051  | 5.45E-01 | -0.11    | 0.412    |
|         |        | 9 | 0.162  | 0.054  | 4.41E-01 | -0.088   | 0.413    |
|         |        | 2 | 1      | 1      | 0.026    | 0.09     | 1.00E+00 |
| 3       | 0.157  |   |        | 0.077  | 9.47E-01 | -0.222   | 0.536    |
| 4       | 0.162  |   |        | 0.079  | 9.34E-01 | -0.211   | 0.536    |
| 5       | -0.086 |   |        | 0.118  | 1.00E+00 | -0.555   | 0.383    |
| 6       | 0.165  |   |        | 0.077  | 9.18E-01 | -0.217   | 0.546    |
| 7       | 0.151  |   |        | 0.078  | 9.67E-01 | -0.223   | 0.525    |
| 8       | 0.177  |   |        | 0.077  | 8.60E-01 | -0.202   | 0.556    |
| 9       | 0.189  |   |        | 0.079  | 7.99E-01 | -0.183   | 0.56     |
| 3       | 1      |   |        | 1      | -0.131   | 0.051    | 7.49E-01 |
|         |        | 2 | -0.157 | 0.077  | 9.47E-01 | -0.536   | 0.222    |
|         |        | 4 | 0.005  | 0.025  | 1.00E+00 | -0.101   | 0.112    |
|         |        | 5 | -0.243 | 0.091  | 6.77E-01 | -0.695   | 0.209    |
|         |        | 6 | 0.008  | 0.018  | 1.00E+00 | -0.063   | 0.079    |
|         |        | 7 | -0.006 | 0.024  | 1.00E+00 | -0.105   | 0.093    |
|         |        | 8 | 0.02   | 0.02   | 1.00E+00 | -0.059   | 0.099    |
|         |        | 9 | 0.032  | 0.027  | 1.00E+00 | -0.081   | 0.144    |
|         |        | 4 | 1      | 1      | -0.136   | 0.053    | 7.10E-01 |
| 2       | -0.162 |   |        | 0.079  | 9.34E-01 | -0.536   | 0.211    |
| 3       | -0.005 |   |        | 0.025  | 1.00E+00 | -0.112   | 0.101    |
| 5       | -0.248 |   |        | 0.092  | 6.47E-01 | -0.695   | 0.198    |
| 6       | 0.002  |   |        | 0.024  | 1.00E+00 | -0.104   | 0.108    |
| 7       | -0.011 |   |        | 0.029  | 1.00E+00 | -0.128   | 0.105    |
| 8       | 0.014  |   |        | 0.025  | 1.00E+00 | -0.093   | 0.122    |
| 9       | 0.026  |   |        | 0.031  | 1.00E+00 | -0.099   | 0.152    |
| 5       | 1      |   |        | 1      | 0.112    | 0.103    | 1.00E+00 |
|         |        | 2 | 0.086  | 0.118  | 1.00E+00 | -0.383   | 0.555    |
|         |        | 3 | 0.243  | 0.091  | 6.77E-01 | -0.209   | 0.695    |
|         |        | 4 | 0.248  | 0.092  | 6.47E-01 | -0.198   | 0.695    |
|         |        | 6 | 0.25   | 0.091  | 6.31E-01 | -0.204   | 0.704    |
|         |        | 7 | 0.237  | 0.092  | 7.16E-01 | -0.211   | 0.684    |
|         |        | 8 | 0.262  | 0.091  | 5.58E-01 | -0.19    | 0.715    |
|         |        | 9 | 0.274  | 0.093  | 4.91E-01 | -0.17    | 0.719    |
|         |        | 6 | 1      | -0.138 | 0.05     | 6.70E-01 | -0.403   |

|     |     |   |   |        |       |          |        |       |
|-----|-----|---|---|--------|-------|----------|--------|-------|
|     |     |   | 2 | -0.165 | 0.077 | 9.18E-01 | -0.546 | 0.217 |
|     |     |   | 3 | -0.008 | 0.018 | 1.00E+00 | -0.079 | 0.063 |
|     |     |   | 4 | -0.002 | 0.024 | 1.00E+00 | -0.108 | 0.104 |
|     |     |   | 5 | -0.25  | 0.091 | 6.31E-01 | -0.704 | 0.204 |
|     |     |   | 7 | -0.014 | 0.023 | 1.00E+00 | -0.11  | 0.083 |
|     |     |   | 8 | 0.012  | 0.018 | 1.00E+00 | -0.06  | 0.085 |
|     |     |   | 9 | 0.024  | 0.026 | 1.00E+00 | -0.088 | 0.136 |
|     |     | 7 | 1 | -0.125 | 0.053 | 8.21E-01 | -0.378 | 0.129 |
|     |     |   | 2 | -0.151 | 0.078 | 9.67E-01 | -0.525 | 0.223 |
|     |     |   | 3 | 0.006  | 0.024 | 1.00E+00 | -0.093 | 0.105 |
|     |     |   | 4 | 0.011  | 0.029 | 1.00E+00 | -0.105 | 0.128 |
|     |     |   | 5 | -0.237 | 0.092 | 7.16E-01 | -0.684 | 0.211 |
|     |     |   | 6 | 0.014  | 0.023 | 1.00E+00 | -0.083 | 0.11  |
|     |     |   | 8 | 0.026  | 0.024 | 1.00E+00 | -0.074 | 0.125 |
|     |     |   | 9 | 0.038  | 0.031 | 1.00E+00 | -0.084 | 0.159 |
|     |     | 8 | 1 | -0.151 | 0.051 | 5.45E-01 | -0.412 | 0.11  |
|     |     |   | 2 | -0.177 | 0.077 | 8.60E-01 | -0.556 | 0.202 |
|     |     |   | 3 | -0.02  | 0.02  | 1.00E+00 | -0.099 | 0.059 |
|     |     |   | 4 | -0.014 | 0.025 | 1.00E+00 | -0.122 | 0.093 |
|     |     |   | 5 | -0.262 | 0.091 | 5.58E-01 | -0.715 | 0.19  |
|     |     |   | 6 | -0.012 | 0.018 | 1.00E+00 | -0.085 | 0.06  |
|     |     |   | 7 | -0.026 | 0.024 | 1.00E+00 | -0.125 | 0.074 |
|     |     |   | 9 | 0.012  | 0.027 | 1.00E+00 | -0.101 | 0.125 |
|     |     | 9 | 1 | -0.162 | 0.054 | 4.41E-01 | -0.413 | 0.088 |
|     |     |   | 2 | -0.189 | 0.079 | 7.99E-01 | -0.56  | 0.183 |
|     |     |   | 3 | -0.032 | 0.027 | 1.00E+00 | -0.144 | 0.081 |
|     |     |   | 4 | -0.026 | 0.031 | 1.00E+00 | -0.152 | 0.099 |
|     |     |   | 5 | -0.274 | 0.093 | 4.91E-01 | -0.719 | 0.17  |
|     |     |   | 6 | -0.024 | 0.026 | 1.00E+00 | -0.136 | 0.088 |
|     |     |   | 7 | -0.038 | 0.031 | 1.00E+00 | -0.159 | 0.084 |
|     |     |   | 8 | -0.012 | 0.027 | 1.00E+00 | -0.125 | 0.101 |
| Pyr | LSD | 1 | 2 | -0.041 | 0.051 | 4.32E-01 | -0.143 | 0.062 |
|     |     |   | 3 | -0.089 | 0.051 | 8.72E-02 | -0.192 | 0.013 |
|     |     |   | 4 | -0.092 | 0.053 | 8.85E-02 | -0.197 | 0.014 |
|     |     |   | 5 | -0.031 | 0.051 | 5.52E-01 | -0.133 | 0.072 |
|     |     |   | 6 | -0.039 | 0.051 | 4.49E-01 | -0.142 | 0.063 |
|     |     |   | 7 | -0.005 | 0.051 | 9.20E-01 | -0.108 | 0.097 |
|     |     |   | 8 | -0.005 | 0.053 | 9.27E-01 | -0.111 | 0.101 |
|     |     |   | 9 | -0.012 | 0.051 | 8.21E-01 | -0.114 | 0.091 |
|     |     | 2 | 1 | 0.041  | 0.051 | 4.32E-01 | -0.062 | 0.143 |
|     |     |   | 3 | -0.049 | 0.049 | 3.31E-01 | -0.148 | 0.05  |

---

|   |   |        |       |          |        |       |
|---|---|--------|-------|----------|--------|-------|
|   | 4 | -0.051 | 0.051 | 3.23E-01 | -0.154 | 0.051 |
|   | 5 | 0.01   | 0.049 | 8.42E-01 | -0.089 | 0.109 |
|   | 6 | 0.002  | 0.049 | 9.76E-01 | -0.098 | 0.101 |
|   | 7 | 0.035  | 0.049 | 4.78E-01 | -0.064 | 0.134 |
|   | 8 | 0.036  | 0.051 | 4.89E-01 | -0.067 | 0.138 |
|   | 9 | 0.029  | 0.049 | 5.62E-01 | -0.07  | 0.128 |
| 3 | 1 | 0.089  | 0.051 | 8.72E-02 | -0.013 | 0.192 |
|   | 2 | 0.049  | 0.049 | 3.31E-01 | -0.05  | 0.148 |
|   | 4 | -0.003 | 0.051 | 9.61E-01 | -0.105 | 0.1   |
|   | 5 | 0.058  | 0.049 | 2.43E-01 | -0.041 | 0.157 |
|   | 6 | 0.05   | 0.049 | 3.16E-01 | -0.049 | 0.149 |
|   | 7 | 0.084  | 0.049 | 9.53E-02 | -0.015 | 0.183 |
|   | 8 | 0.084  | 0.051 | 1.06E-01 | -0.018 | 0.187 |
|   | 9 | 0.077  | 0.049 | 1.23E-01 | -0.022 | 0.176 |
| 4 | 1 | 0.092  | 0.053 | 8.85E-02 | -0.014 | 0.197 |
|   | 2 | 0.051  | 0.051 | 3.23E-01 | -0.051 | 0.154 |
|   | 3 | 0.003  | 0.051 | 9.61E-01 | -0.1   | 0.105 |
|   | 5 | 0.061  | 0.051 | 2.39E-01 | -0.042 | 0.163 |
|   | 6 | 0.053  | 0.051 | 3.09E-01 | -0.05  | 0.155 |
|   | 7 | 0.086  | 0.051 | 9.68E-02 | -0.016 | 0.189 |
|   | 8 | 0.087  | 0.053 | 1.07E-01 | -0.019 | 0.193 |
|   | 9 | 0.08   | 0.051 | 1.24E-01 | -0.023 | 0.182 |
| 5 | 1 | 0.031  | 0.051 | 5.52E-01 | -0.072 | 0.133 |
|   | 2 | -0.01  | 0.049 | 8.42E-01 | -0.109 | 0.089 |
|   | 3 | -0.058 | 0.049 | 2.43E-01 | -0.157 | 0.041 |
|   | 4 | -0.061 | 0.051 | 2.39E-01 | -0.163 | 0.042 |
|   | 6 | -0.008 | 0.049 | 8.66E-01 | -0.107 | 0.091 |
|   | 7 | 0.025  | 0.049 | 6.09E-01 | -0.074 | 0.124 |
|   | 8 | 0.026  | 0.051 | 6.17E-01 | -0.077 | 0.128 |
|   | 9 | 0.019  | 0.049 | 7.03E-01 | -0.08  | 0.118 |
| 6 | 1 | 0.039  | 0.051 | 4.49E-01 | -0.063 | 0.142 |
|   | 2 | -0.002 | 0.049 | 9.76E-01 | -0.101 | 0.098 |
|   | 3 | -0.05  | 0.049 | 3.16E-01 | -0.149 | 0.049 |
|   | 4 | -0.053 | 0.051 | 3.09E-01 | -0.155 | 0.05  |
|   | 5 | 0.008  | 0.049 | 8.66E-01 | -0.091 | 0.107 |
|   | 7 | 0.034  | 0.049 | 4.97E-01 | -0.065 | 0.133 |
|   | 8 | 0.034  | 0.051 | 5.08E-01 | -0.068 | 0.137 |
|   | 9 | 0.027  | 0.049 | 5.82E-01 | -0.072 | 0.126 |
| 7 | 1 | 0.005  | 0.051 | 9.20E-01 | -0.097 | 0.108 |
|   | 2 | -0.035 | 0.049 | 4.78E-01 | -0.134 | 0.064 |
|   | 3 | -0.084 | 0.049 | 9.53E-02 | -0.183 | 0.015 |

---

|         |   |   |        |       |          |        |       |
|---------|---|---|--------|-------|----------|--------|-------|
|         |   | 4 | -0.086 | 0.051 | 9.68E-02 | -0.189 | 0.016 |
|         |   | 5 | -0.025 | 0.049 | 6.09E-01 | -0.124 | 0.074 |
|         |   | 6 | -0.034 | 0.049 | 4.97E-01 | -0.133 | 0.065 |
|         |   | 8 | 0      | 0.051 | 9.96E-01 | -0.102 | 0.103 |
|         |   | 9 | -0.006 | 0.049 | 8.96E-01 | -0.105 | 0.093 |
|         | 8 | 1 | 0.005  | 0.053 | 9.27E-01 | -0.101 | 0.111 |
|         |   | 2 | -0.036 | 0.051 | 4.89E-01 | -0.138 | 0.067 |
|         |   | 3 | -0.084 | 0.051 | 1.06E-01 | -0.187 | 0.018 |
|         |   | 4 | -0.087 | 0.053 | 1.07E-01 | -0.193 | 0.019 |
|         |   | 5 | -0.026 | 0.051 | 6.17E-01 | -0.128 | 0.077 |
|         |   | 6 | -0.034 | 0.051 | 5.08E-01 | -0.137 | 0.068 |
|         |   | 7 | 0      | 0.051 | 9.96E-01 | -0.103 | 0.102 |
|         |   | 9 | -0.007 | 0.051 | 8.95E-01 | -0.109 | 0.096 |
|         | 9 | 1 | 0.012  | 0.051 | 8.21E-01 | -0.091 | 0.114 |
|         |   | 2 | -0.029 | 0.049 | 5.62E-01 | -0.128 | 0.07  |
|         |   | 3 | -0.077 | 0.049 | 1.23E-01 | -0.176 | 0.022 |
|         |   | 4 | -0.08  | 0.051 | 1.24E-01 | -0.182 | 0.023 |
|         |   | 5 | -0.019 | 0.049 | 7.03E-01 | -0.118 | 0.08  |
|         |   | 6 | -0.027 | 0.049 | 5.82E-01 | -0.126 | 0.072 |
|         |   | 7 | 0.006  | 0.049 | 8.96E-01 | -0.093 | 0.105 |
|         |   | 8 | 0.007  | 0.051 | 8.95E-01 | -0.096 | 0.109 |
| Tamhane | 1 | 2 | -0.041 | 0.035 | 1.00E+00 | -0.19  | 0.109 |
|         |   | 3 | -0.089 | 0.061 | 9.99E-01 | -0.379 | 0.201 |
|         |   | 4 | -0.092 | 0.065 | 1.00E+00 | -0.432 | 0.249 |
|         |   | 5 | -0.031 | 0.033 | 1.00E+00 | -0.17  | 0.109 |
|         |   | 6 | -0.039 | 0.033 | 1.00E+00 | -0.178 | 0.1   |
|         |   | 7 | -0.005 | 0.024 | 1.00E+00 | -0.101 | 0.09  |
|         |   | 8 | -0.005 | 0.031 | 1.00E+00 | -0.142 | 0.132 |
|         |   | 9 | -0.012 | 0.025 | 1.00E+00 | -0.113 | 0.089 |
|         | 2 | 1 | 0.041  | 0.035 | 1.00E+00 | -0.109 | 0.19  |
|         |   | 3 | -0.049 | 0.066 | 1.00E+00 | -0.333 | 0.236 |
|         |   | 4 | -0.051 | 0.071 | 1.00E+00 | -0.375 | 0.273 |
|         |   | 5 | 0.01   | 0.042 | 1.00E+00 | -0.157 | 0.177 |
|         |   | 6 | 0.002  | 0.042 | 1.00E+00 | -0.165 | 0.168 |
|         |   | 7 | 0.035  | 0.036 | 1.00E+00 | -0.114 | 0.185 |
|         |   | 8 | 0.036  | 0.041 | 1.00E+00 | -0.129 | 0.201 |
|         |   | 9 | 0.029  | 0.036 | 1.00E+00 | -0.122 | 0.18  |
|         | 3 | 1 | 0.089  | 0.061 | 9.99E-01 | -0.201 | 0.379 |
|         |   | 2 | 0.049  | 0.066 | 1.00E+00 | -0.236 | 0.333 |
|         |   | 4 | -0.003 | 0.087 | 1.00E+00 | -0.354 | 0.349 |
|         |   | 5 | 0.058  | 0.065 | 1.00E+00 | -0.225 | 0.342 |

|   |   |        |       |          |        |       |
|---|---|--------|-------|----------|--------|-------|
|   | 6 | 0.05   | 0.065 | 1.00E+00 | -0.234 | 0.334 |
|   | 7 | 0.084  | 0.061 | 1.00E+00 | -0.205 | 0.372 |
|   | 8 | 0.084  | 0.065 | 1.00E+00 | -0.2   | 0.369 |
|   | 9 | 0.077  | 0.062 | 1.00E+00 | -0.21  | 0.365 |
| 4 | 1 | 0.092  | 0.065 | 1.00E+00 | -0.249 | 0.432 |
|   | 2 | 0.051  | 0.071 | 1.00E+00 | -0.273 | 0.375 |
|   | 3 | 0.003  | 0.087 | 1.00E+00 | -0.349 | 0.354 |
|   | 5 | 0.061  | 0.07  | 1.00E+00 | -0.264 | 0.386 |
|   | 6 | 0.053  | 0.07  | 1.00E+00 | -0.273 | 0.378 |
|   | 7 | 0.086  | 0.066 | 1.00E+00 | -0.251 | 0.424 |
|   | 8 | 0.087  | 0.069 | 1.00E+00 | -0.241 | 0.414 |
|   | 9 | 0.08   | 0.066 | 1.00E+00 | -0.255 | 0.415 |
| 5 | 1 | 0.031  | 0.033 | 1.00E+00 | -0.109 | 0.17  |
|   | 2 | -0.01  | 0.042 | 1.00E+00 | -0.177 | 0.157 |
|   | 3 | -0.058 | 0.065 | 1.00E+00 | -0.342 | 0.225 |
|   | 4 | -0.061 | 0.07  | 1.00E+00 | -0.386 | 0.264 |
|   | 6 | -0.008 | 0.041 | 1.00E+00 | -0.169 | 0.152 |
|   | 7 | 0.025  | 0.034 | 1.00E+00 | -0.115 | 0.166 |
|   | 8 | 0.026  | 0.039 | 1.00E+00 | -0.133 | 0.184 |
|   | 9 | 0.019  | 0.035 | 1.00E+00 | -0.123 | 0.161 |
| 6 | 1 | 0.039  | 0.033 | 1.00E+00 | -0.1   | 0.178 |
|   | 2 | -0.002 | 0.042 | 1.00E+00 | -0.168 | 0.165 |
|   | 3 | -0.05  | 0.065 | 1.00E+00 | -0.334 | 0.234 |
|   | 4 | -0.053 | 0.07  | 1.00E+00 | -0.378 | 0.273 |
|   | 5 | 0.008  | 0.041 | 1.00E+00 | -0.152 | 0.169 |
|   | 7 | 0.034  | 0.034 | 1.00E+00 | -0.106 | 0.173 |
|   | 8 | 0.034  | 0.039 | 1.00E+00 | -0.124 | 0.192 |
|   | 9 | 0.027  | 0.035 | 1.00E+00 | -0.114 | 0.169 |
| 7 | 1 | 0.005  | 0.024 | 1.00E+00 | -0.09  | 0.101 |
|   | 2 | -0.035 | 0.036 | 1.00E+00 | -0.185 | 0.114 |
|   | 3 | -0.084 | 0.061 | 1.00E+00 | -0.372 | 0.205 |
|   | 4 | -0.086 | 0.066 | 1.00E+00 | -0.424 | 0.251 |
|   | 5 | -0.025 | 0.034 | 1.00E+00 | -0.166 | 0.115 |
|   | 6 | -0.034 | 0.034 | 1.00E+00 | -0.173 | 0.106 |
|   | 8 | 0      | 0.032 | 1.00E+00 | -0.137 | 0.137 |
|   | 9 | -0.006 | 0.026 | 1.00E+00 | -0.111 | 0.098 |
| 8 | 1 | 0.005  | 0.031 | 1.00E+00 | -0.132 | 0.142 |
|   | 2 | -0.036 | 0.041 | 1.00E+00 | -0.201 | 0.129 |
|   | 3 | -0.084 | 0.065 | 1.00E+00 | -0.369 | 0.2   |
|   | 4 | -0.087 | 0.069 | 1.00E+00 | -0.414 | 0.241 |
|   | 5 | -0.026 | 0.039 | 1.00E+00 | -0.184 | 0.133 |



|    |     |   |   |        |       |          |        |       |
|----|-----|---|---|--------|-------|----------|--------|-------|
|    |     |   | 6 | -0.034 | 0.039 | 1.00E+00 | -0.192 | 0.124 |
|    |     |   | 7 | 0      | 0.032 | 1.00E+00 | -0.137 | 0.137 |
|    |     |   | 9 | -0.007 | 0.033 | 1.00E+00 | -0.145 | 0.132 |
|    |     | 9 | 1 | 0.012  | 0.025 | 1.00E+00 | -0.089 | 0.113 |
|    |     |   | 2 | -0.029 | 0.036 | 1.00E+00 | -0.18  | 0.122 |
|    |     |   | 3 | -0.077 | 0.062 | 1.00E+00 | -0.365 | 0.21  |
|    |     |   | 4 | -0.08  | 0.066 | 1.00E+00 | -0.415 | 0.255 |
|    |     |   | 5 | -0.019 | 0.035 | 1.00E+00 | -0.161 | 0.123 |
|    |     |   | 6 | -0.027 | 0.035 | 1.00E+00 | -0.169 | 0.114 |
|    |     |   | 7 | 0.006  | 0.026 | 1.00E+00 | -0.098 | 0.111 |
|    |     |   | 8 | 0.007  | 0.033 | 1.00E+00 | -0.132 | 0.145 |
| Cr | LSD | 1 | 2 | 0.013  | 0.065 | 8.43E-01 | -0.117 | 0.143 |
|    |     |   | 3 | -0.007 | 0.065 | 9.17E-01 | -0.137 | 0.124 |
|    |     |   | 4 | -0.092 | 0.067 | 1.77E-01 | -0.227 | 0.043 |
|    |     |   | 5 | -0.096 | 0.065 | 1.46E-01 | -0.226 | 0.034 |
|    |     |   | 6 | -0.044 | 0.065 | 5.07E-01 | -0.174 | 0.087 |
|    |     |   | 7 | -0.006 | 0.065 | 9.25E-01 | -0.137 | 0.124 |
|    |     |   | 8 | -0.003 | 0.067 | 9.69E-01 | -0.137 | 0.132 |
|    |     |   | 9 | 0.006  | 0.065 | 9.28E-01 | -0.125 | 0.136 |
|    |     | 2 | 1 | -0.013 | 0.065 | 8.43E-01 | -0.143 | 0.117 |
|    |     |   | 3 | -0.02  | 0.063 | 7.54E-01 | -0.146 | 0.106 |
|    |     |   | 4 | -0.105 | 0.065 | 1.12E-01 | -0.235 | 0.025 |
|    |     |   | 5 | -0.109 | 0.063 | 8.90E-02 | -0.235 | 0.017 |
|    |     |   | 6 | -0.056 | 0.063 | 3.74E-01 | -0.182 | 0.07  |
|    |     |   | 7 | -0.019 | 0.063 | 7.63E-01 | -0.145 | 0.107 |
|    |     |   | 8 | -0.016 | 0.065 | 8.13E-01 | -0.146 | 0.115 |
|    |     |   | 9 | -0.007 | 0.063 | 9.12E-01 | -0.133 | 0.119 |
|    |     | 3 | 1 | 0.007  | 0.065 | 9.17E-01 | -0.124 | 0.137 |
|    |     |   | 2 | 0.02   | 0.063 | 7.54E-01 | -0.106 | 0.146 |
|    |     |   | 4 | -0.085 | 0.065 | 1.96E-01 | -0.216 | 0.045 |
|    |     |   | 5 | -0.089 | 0.063 | 1.63E-01 | -0.215 | 0.037 |
|    |     |   | 6 | -0.037 | 0.063 | 5.63E-01 | -0.163 | 0.089 |
|    |     |   | 7 | 0.001  | 0.063 | 9.91E-01 | -0.125 | 0.127 |
|    |     |   | 8 | 0.004  | 0.065 | 9.48E-01 | -0.126 | 0.135 |
|    |     |   | 9 | 0.013  | 0.063 | 8.40E-01 | -0.113 | 0.139 |
|    |     | 4 | 1 | 0.092  | 0.067 | 1.77E-01 | -0.043 | 0.227 |
|    |     |   | 2 | 0.105  | 0.065 | 1.12E-01 | -0.025 | 0.235 |
|    |     |   | 3 | 0.085  | 0.065 | 1.96E-01 | -0.045 | 0.216 |
|    |     |   | 5 | -0.004 | 0.065 | 9.53E-01 | -0.134 | 0.127 |
|    |     |   | 6 | 0.049  | 0.065 | 4.59E-01 | -0.082 | 0.179 |
|    |     |   | 7 | 0.086  | 0.065 | 1.93E-01 | -0.044 | 0.216 |

---

|   |   |        |       |          |        |       |
|---|---|--------|-------|----------|--------|-------|
|   | 8 | 0.09   | 0.067 | 1.89E-01 | -0.045 | 0.224 |
|   | 9 | 0.098  | 0.065 | 1.38E-01 | -0.032 | 0.228 |
| 5 | 1 | 0.096  | 0.065 | 1.46E-01 | -0.034 | 0.226 |
|   | 2 | 0.109  | 0.063 | 8.90E-02 | -0.017 | 0.235 |
|   | 3 | 0.089  | 0.063 | 1.63E-01 | -0.037 | 0.215 |
|   | 4 | 0.004  | 0.065 | 9.53E-01 | -0.127 | 0.134 |
|   | 6 | 0.052  | 0.063 | 4.08E-01 | -0.074 | 0.178 |
|   | 7 | 0.09   | 0.063 | 1.59E-01 | -0.036 | 0.216 |
|   | 8 | 0.093  | 0.065 | 1.57E-01 | -0.037 | 0.224 |
|   | 9 | 0.102  | 0.063 | 1.11E-01 | -0.024 | 0.228 |
| 6 | 1 | 0.044  | 0.065 | 5.07E-01 | -0.087 | 0.174 |
|   | 2 | 0.056  | 0.063 | 3.74E-01 | -0.07  | 0.182 |
|   | 3 | 0.037  | 0.063 | 5.63E-01 | -0.089 | 0.163 |
|   | 4 | -0.049 | 0.065 | 4.59E-01 | -0.179 | 0.082 |
|   | 5 | -0.052 | 0.063 | 4.08E-01 | -0.178 | 0.074 |
|   | 7 | 0.037  | 0.063 | 5.56E-01 | -0.089 | 0.163 |
|   | 8 | 0.041  | 0.065 | 5.33E-01 | -0.09  | 0.171 |
|   | 9 | 0.049  | 0.063 | 4.36E-01 | -0.077 | 0.175 |
| 7 | 1 | 0.006  | 0.065 | 9.25E-01 | -0.124 | 0.137 |
|   | 2 | 0.019  | 0.063 | 7.63E-01 | -0.107 | 0.145 |
|   | 3 | -0.001 | 0.063 | 9.91E-01 | -0.127 | 0.125 |
|   | 4 | -0.086 | 0.065 | 1.93E-01 | -0.216 | 0.044 |
|   | 5 | -0.09  | 0.063 | 1.59E-01 | -0.216 | 0.036 |
|   | 6 | -0.037 | 0.063 | 5.56E-01 | -0.163 | 0.089 |
|   | 8 | 0.004  | 0.065 | 9.56E-01 | -0.127 | 0.134 |
|   | 9 | 0.012  | 0.063 | 8.49E-01 | -0.114 | 0.138 |
| 8 | 1 | 0.003  | 0.067 | 9.69E-01 | -0.132 | 0.137 |
|   | 2 | 0.016  | 0.065 | 8.13E-01 | -0.115 | 0.146 |
|   | 3 | -0.004 | 0.065 | 9.48E-01 | -0.135 | 0.126 |
|   | 4 | -0.09  | 0.067 | 1.89E-01 | -0.224 | 0.045 |
|   | 5 | -0.093 | 0.065 | 1.57E-01 | -0.224 | 0.037 |
|   | 6 | -0.041 | 0.065 | 5.33E-01 | -0.171 | 0.09  |
|   | 7 | -0.004 | 0.065 | 9.56E-01 | -0.134 | 0.127 |
|   | 9 | 0.008  | 0.065 | 8.97E-01 | -0.122 | 0.139 |
| 9 | 1 | -0.006 | 0.065 | 9.28E-01 | -0.136 | 0.125 |
|   | 2 | 0.007  | 0.063 | 9.12E-01 | -0.119 | 0.133 |
|   | 3 | -0.013 | 0.063 | 8.40E-01 | -0.139 | 0.113 |
|   | 4 | -0.098 | 0.065 | 1.38E-01 | -0.228 | 0.032 |
|   | 5 | -0.102 | 0.063 | 1.11E-01 | -0.228 | 0.024 |
|   | 6 | -0.049 | 0.063 | 4.36E-01 | -0.175 | 0.077 |
|   | 7 | -0.012 | 0.063 | 8.49E-01 | -0.138 | 0.114 |

---

|         |   |   |        |       |          |        |       |
|---------|---|---|--------|-------|----------|--------|-------|
|         |   | 8 | -0.008 | 0.065 | 8.97E-01 | -0.139 | 0.122 |
| Tamhane | 1 | 2 | 0.013  | 0.031 | 1.00E+00 | -0.118 | 0.144 |
|         |   | 3 | -0.007 | 0.057 | 1.00E+00 | -0.275 | 0.261 |
|         |   | 4 | -0.092 | 0.071 | 1.00E+00 | -0.46  | 0.276 |
|         |   | 5 | -0.096 | 0.086 | 1.00E+00 | -0.519 | 0.327 |
|         |   | 6 | -0.044 | 0.041 | 1.00E+00 | -0.225 | 0.138 |
|         |   | 7 | -0.006 | 0.026 | 1.00E+00 | -0.111 | 0.098 |
|         |   | 8 | -0.003 | 0.026 | 1.00E+00 | -0.11  | 0.105 |
|         |   | 9 | 0.006  | 0.024 | 1.00E+00 | -0.09  | 0.102 |
|         | 2 | 1 | -0.013 | 0.031 | 1.00E+00 | -0.144 | 0.118 |
|         |   | 3 | -0.02  | 0.061 | 1.00E+00 | -0.284 | 0.244 |
|         |   | 4 | -0.105 | 0.074 | 1.00E+00 | -0.46  | 0.25  |
|         |   | 5 | -0.109 | 0.089 | 1.00E+00 | -0.524 | 0.306 |
|         |   | 6 | -0.056 | 0.046 | 1.00E+00 | -0.243 | 0.13  |
|         |   | 7 | -0.019 | 0.033 | 1.00E+00 | -0.153 | 0.115 |
|         |   | 8 | -0.016 | 0.033 | 1.00E+00 | -0.151 | 0.12  |
|         |   | 9 | -0.007 | 0.032 | 1.00E+00 | -0.137 | 0.123 |
|         | 3 | 1 | 0.007  | 0.057 | 1.00E+00 | -0.261 | 0.275 |
|         |   | 2 | 0.02   | 0.061 | 1.00E+00 | -0.244 | 0.284 |
|         |   | 4 | -0.085 | 0.088 | 1.00E+00 | -0.447 | 0.277 |
|         |   | 5 | -0.089 | 0.101 | 1.00E+00 | -0.505 | 0.327 |
|         |   | 6 | -0.037 | 0.066 | 1.00E+00 | -0.307 | 0.234 |
|         |   | 7 | 0.001  | 0.058 | 1.00E+00 | -0.265 | 0.266 |
|         |   | 8 | 0.004  | 0.058 | 1.00E+00 | -0.262 | 0.27  |
|         |   | 9 | 0.013  | 0.057 | 1.00E+00 | -0.255 | 0.28  |
|         | 4 | 1 | 0.092  | 0.071 | 1.00E+00 | -0.276 | 0.46  |
|         |   | 2 | 0.105  | 0.074 | 1.00E+00 | -0.25  | 0.46  |
|         |   | 3 | 0.085  | 0.088 | 1.00E+00 | -0.277 | 0.447 |
|         |   | 5 | -0.004 | 0.109 | 1.00E+00 | -0.446 | 0.438 |
|         |   | 6 | 0.049  | 0.078 | 1.00E+00 | -0.3   | 0.397 |
|         |   | 7 | 0.086  | 0.071 | 1.00E+00 | -0.277 | 0.449 |
|         |   | 8 | 0.09   | 0.071 | 1.00E+00 | -0.274 | 0.453 |
|         |   | 9 | 0.098  | 0.071 | 1.00E+00 | -0.269 | 0.465 |
|         | 5 | 1 | 0.096  | 0.086 | 1.00E+00 | -0.327 | 0.519 |
|         |   | 2 | 0.109  | 0.089 | 1.00E+00 | -0.306 | 0.524 |
|         |   | 3 | 0.089  | 0.101 | 1.00E+00 | -0.327 | 0.505 |
|         |   | 4 | 0.004  | 0.109 | 1.00E+00 | -0.438 | 0.446 |
|         |   | 6 | 0.052  | 0.093 | 1.00E+00 | -0.357 | 0.462 |
|         |   | 7 | 0.09   | 0.087 | 1.00E+00 | -0.33  | 0.51  |
|         |   | 8 | 0.093  | 0.087 | 1.00E+00 | -0.327 | 0.514 |
|         |   | 9 | 0.102  | 0.086 | 1.00E+00 | -0.321 | 0.524 |

|     |     |   |   |        |       |          |        |       |
|-----|-----|---|---|--------|-------|----------|--------|-------|
|     |     | 6 | 1 | 0.044  | 0.041 | 1.00E+00 | -0.138 | 0.225 |
|     |     |   | 2 | 0.056  | 0.046 | 1.00E+00 | -0.13  | 0.243 |
|     |     |   | 3 | 0.037  | 0.066 | 1.00E+00 | -0.234 | 0.307 |
|     |     |   | 4 | -0.049 | 0.078 | 1.00E+00 | -0.397 | 0.3   |
|     |     |   | 5 | -0.052 | 0.093 | 1.00E+00 | -0.462 | 0.357 |
|     |     |   | 7 | 0.037  | 0.042 | 1.00E+00 | -0.144 | 0.219 |
|     |     |   | 8 | 0.041  | 0.042 | 1.00E+00 | -0.141 | 0.223 |
|     |     |   | 9 | 0.049  | 0.041 | 1.00E+00 | -0.132 | 0.23  |
|     |     | 7 | 1 | 0.006  | 0.026 | 1.00E+00 | -0.098 | 0.111 |
|     |     |   | 2 | 0.019  | 0.033 | 1.00E+00 | -0.115 | 0.153 |
|     |     |   | 3 | -0.001 | 0.058 | 1.00E+00 | -0.266 | 0.265 |
|     |     |   | 4 | -0.086 | 0.071 | 1.00E+00 | -0.449 | 0.277 |
|     |     |   | 5 | -0.09  | 0.087 | 1.00E+00 | -0.51  | 0.33  |
|     |     |   | 6 | -0.037 | 0.042 | 1.00E+00 | -0.219 | 0.144 |
|     |     |   | 8 | 0.004  | 0.028 | 1.00E+00 | -0.11  | 0.117 |
|     |     |   | 9 | 0.012  | 0.026 | 1.00E+00 | -0.092 | 0.116 |
|     |     | 8 | 1 | 0.003  | 0.026 | 1.00E+00 | -0.105 | 0.11  |
|     |     |   | 2 | 0.016  | 0.033 | 1.00E+00 | -0.12  | 0.151 |
|     |     |   | 3 | -0.004 | 0.058 | 1.00E+00 | -0.27  | 0.262 |
|     |     |   | 4 | -0.09  | 0.071 | 1.00E+00 | -0.453 | 0.274 |
|     |     |   | 5 | -0.093 | 0.087 | 1.00E+00 | -0.514 | 0.327 |
|     |     |   | 6 | -0.041 | 0.042 | 1.00E+00 | -0.223 | 0.141 |
|     |     |   | 7 | -0.004 | 0.028 | 1.00E+00 | -0.117 | 0.11  |
|     |     |   | 9 | 0.008  | 0.026 | 1.00E+00 | -0.098 | 0.115 |
|     |     | 9 | 1 | -0.006 | 0.024 | 1.00E+00 | -0.102 | 0.09  |
|     |     |   | 2 | 0.007  | 0.032 | 1.00E+00 | -0.123 | 0.137 |
|     |     |   | 3 | -0.013 | 0.057 | 1.00E+00 | -0.28  | 0.255 |
|     |     |   | 4 | -0.098 | 0.071 | 1.00E+00 | -0.465 | 0.269 |
|     |     |   | 5 | -0.102 | 0.086 | 1.00E+00 | -0.524 | 0.321 |
|     |     |   | 6 | -0.049 | 0.041 | 1.00E+00 | -0.23  | 0.132 |
|     |     |   | 7 | -0.012 | 0.026 | 1.00E+00 | -0.116 | 0.092 |
|     |     |   | 8 | -0.008 | 0.026 | 1.00E+00 | -0.115 | 0.098 |
| Gly | LSD | 1 | 2 | -0.013 | 0.052 | 8.08E-01 | -0.117 | 0.092 |
|     |     |   | 3 | 0.083  | 0.052 | 1.16E-01 | -0.021 | 0.188 |
|     |     |   | 4 | -0.019 | 0.054 | 7.30E-01 | -0.127 | 0.089 |
|     |     |   | 5 | -0.034 | 0.052 | 5.22E-01 | -0.138 | 0.071 |
|     |     |   | 6 | -0.024 | 0.052 | 6.53E-01 | -0.128 | 0.081 |
|     |     |   | 7 | 0.052  | 0.052 | 3.28E-01 | -0.053 | 0.156 |
|     |     |   | 8 | 0.033  | 0.054 | 5.48E-01 | -0.075 | 0.141 |
|     |     |   | 9 | 0.02   | 0.052 | 6.98E-01 | -0.084 | 0.125 |
|     |     | 2 | 1 | 0.013  | 0.052 | 8.08E-01 | -0.092 | 0.117 |

---

|   |   |        |       |          |        |        |
|---|---|--------|-------|----------|--------|--------|
|   | 3 | 0.096  | 0.05  | 6.20E-02 | -0.005 | 0.197  |
|   | 4 | -0.006 | 0.052 | 9.10E-01 | -0.11  | 0.099  |
|   | 5 | -0.021 | 0.05  | 6.80E-01 | -0.122 | 0.08   |
|   | 6 | -0.011 | 0.05  | 8.31E-01 | -0.112 | 0.09   |
|   | 7 | 0.064  | 0.05  | 2.08E-01 | -0.037 | 0.165  |
|   | 8 | 0.045  | 0.052 | 3.89E-01 | -0.059 | 0.15   |
|   | 9 | 0.033  | 0.05  | 5.14E-01 | -0.068 | 0.134  |
| 3 | 1 | -0.083 | 0.052 | 1.16E-01 | -0.188 | 0.021  |
|   | 2 | -0.096 | 0.05  | 6.20E-02 | -0.197 | 0.005  |
|   | 4 | -0.102 | 0.052 | 5.58E-02 | -0.206 | 0.003  |
|   | 5 | -.117* | 0.05  | 2.40E-02 | -0.218 | -0.016 |
|   | 6 | -.107* | 0.05  | 3.85E-02 | -0.208 | -0.006 |
|   | 7 | -0.032 | 0.05  | 5.32E-01 | -0.133 | 0.069  |
|   | 8 | -0.051 | 0.052 | 3.37E-01 | -0.155 | 0.054  |
|   | 9 | -0.063 | 0.05  | 2.18E-01 | -0.164 | 0.038  |
| 4 | 1 | 0.019  | 0.054 | 7.30E-01 | -0.089 | 0.127  |
|   | 2 | 0.006  | 0.052 | 9.10E-01 | -0.099 | 0.11   |
|   | 3 | 0.102  | 0.052 | 5.58E-02 | -0.003 | 0.206  |
|   | 5 | -0.015 | 0.052 | 7.75E-01 | -0.119 | 0.089  |
|   | 6 | -0.005 | 0.052 | 9.26E-01 | -0.109 | 0.1    |
|   | 7 | 0.07   | 0.052 | 1.84E-01 | -0.034 | 0.175  |
|   | 8 | 0.051  | 0.054 | 3.46E-01 | -0.057 | 0.159  |
|   | 9 | 0.039  | 0.052 | 4.58E-01 | -0.065 | 0.144  |
| 5 | 1 | 0.034  | 0.052 | 5.22E-01 | -0.071 | 0.138  |
|   | 2 | 0.021  | 0.05  | 6.80E-01 | -0.08  | 0.122  |
|   | 3 | .117*  | 0.05  | 2.40E-02 | 0.016  | 0.218  |
|   | 4 | 0.015  | 0.052 | 7.75E-01 | -0.089 | 0.119  |
|   | 6 | 0.01   | 0.05  | 8.42E-01 | -0.091 | 0.111  |
|   | 7 | 0.085  | 0.05  | 9.66E-02 | -0.016 | 0.186  |
|   | 8 | 0.066  | 0.052 | 2.10E-01 | -0.038 | 0.171  |
|   | 9 | 0.054  | 0.05  | 2.89E-01 | -0.047 | 0.155  |
| 6 | 1 | 0.024  | 0.052 | 6.53E-01 | -0.081 | 0.128  |
|   | 2 | 0.011  | 0.05  | 8.31E-01 | -0.09  | 0.112  |
|   | 3 | .107*  | 0.05  | 3.85E-02 | 0.006  | 0.208  |
|   | 4 | 0.005  | 0.052 | 9.26E-01 | -0.1   | 0.109  |
|   | 5 | -0.01  | 0.05  | 8.42E-01 | -0.111 | 0.091  |
|   | 7 | 0.075  | 0.05  | 1.42E-01 | -0.026 | 0.176  |
|   | 8 | 0.056  | 0.052 | 2.86E-01 | -0.048 | 0.161  |
|   | 9 | 0.044  | 0.05  | 3.87E-01 | -0.057 | 0.145  |
| 7 | 1 | -0.052 | 0.052 | 3.28E-01 | -0.156 | 0.053  |
|   | 2 | -0.064 | 0.05  | 2.08E-01 | -0.165 | 0.037  |

---

|         |   |   |        |       |          |        |       |
|---------|---|---|--------|-------|----------|--------|-------|
|         |   | 3 | 0.032  | 0.05  | 5.32E-01 | -0.069 | 0.133 |
|         |   | 4 | -0.07  | 0.052 | 1.84E-01 | -0.175 | 0.034 |
|         |   | 5 | -0.085 | 0.05  | 9.66E-02 | -0.186 | 0.016 |
|         |   | 6 | -0.075 | 0.05  | 1.42E-01 | -0.176 | 0.026 |
|         |   | 8 | -0.019 | 0.052 | 7.19E-01 | -0.123 | 0.086 |
|         |   | 9 | -0.031 | 0.05  | 5.39E-01 | -0.132 | 0.07  |
|         | 8 | 1 | -0.033 | 0.054 | 5.48E-01 | -0.141 | 0.075 |
|         |   | 2 | -0.045 | 0.052 | 3.89E-01 | -0.15  | 0.059 |
|         |   | 3 | 0.051  | 0.052 | 3.37E-01 | -0.054 | 0.155 |
|         |   | 4 | -0.051 | 0.054 | 3.46E-01 | -0.159 | 0.057 |
|         |   | 5 | -0.066 | 0.052 | 2.10E-01 | -0.171 | 0.038 |
|         |   | 6 | -0.056 | 0.052 | 2.86E-01 | -0.161 | 0.048 |
|         |   | 7 | 0.019  | 0.052 | 7.19E-01 | -0.086 | 0.123 |
|         |   | 9 | -0.012 | 0.052 | 8.16E-01 | -0.117 | 0.092 |
|         | 9 | 1 | -0.02  | 0.052 | 6.98E-01 | -0.125 | 0.084 |
|         |   | 2 | -0.033 | 0.05  | 5.14E-01 | -0.134 | 0.068 |
|         |   | 3 | 0.063  | 0.05  | 2.18E-01 | -0.038 | 0.164 |
|         |   | 4 | -0.039 | 0.052 | 4.58E-01 | -0.144 | 0.065 |
|         |   | 5 | -0.054 | 0.05  | 2.89E-01 | -0.155 | 0.047 |
|         |   | 6 | -0.044 | 0.05  | 3.87E-01 | -0.145 | 0.057 |
|         |   | 7 | 0.031  | 0.05  | 5.39E-01 | -0.07  | 0.132 |
|         |   | 8 | 0.012  | 0.052 | 8.16E-01 | -0.092 | 0.117 |
| Tamhane | 1 | 2 | -0.013 | 0.059 | 1.00E+00 | -0.257 | 0.231 |
|         |   | 3 | 0.083  | 0.052 | 9.96E-01 | -0.155 | 0.322 |
|         |   | 4 | -0.019 | 0.066 | 1.00E+00 | -0.289 | 0.252 |
|         |   | 5 | -0.034 | 0.063 | 1.00E+00 | -0.29  | 0.223 |
|         |   | 6 | -0.024 | 0.06  | 1.00E+00 | -0.27  | 0.223 |
|         |   | 7 | 0.052  | 0.054 | 1.00E+00 | -0.186 | 0.289 |
|         |   | 8 | 0.033  | 0.059 | 1.00E+00 | -0.216 | 0.281 |
|         |   | 9 | 0.02   | 0.056 | 1.00E+00 | -0.219 | 0.26  |
|         | 2 | 1 | 0.013  | 0.059 | 1.00E+00 | -0.231 | 0.257 |
|         |   | 3 | 0.096  | 0.042 | 7.73E-01 | -0.076 | 0.268 |
|         |   | 4 | -0.006 | 0.058 | 1.00E+00 | -0.247 | 0.235 |
|         |   | 5 | -0.021 | 0.055 | 1.00E+00 | -0.241 | 0.199 |
|         |   | 6 | -0.011 | 0.051 | 1.00E+00 | -0.214 | 0.192 |
|         |   | 7 | 0.064  | 0.045 | 9.99E-01 | -0.115 | 0.244 |
|         |   | 8 | 0.045  | 0.051 | 1.00E+00 | -0.16  | 0.251 |
|         |   | 9 | 0.033  | 0.047 | 1.00E+00 | -0.154 | 0.22  |
|         | 3 | 1 | -0.083 | 0.052 | 9.96E-01 | -0.322 | 0.155 |
|         |   | 2 | -0.096 | 0.042 | 7.73E-01 | -0.268 | 0.076 |
|         |   | 4 | -0.102 | 0.051 | 9.48E-01 | -0.337 | 0.133 |

---

|   |   |        |       |          |        |       |
|---|---|--------|-------|----------|--------|-------|
|   | 5 | -0.117 | 0.048 | 7.07E-01 | -0.322 | 0.088 |
|   | 6 | -0.107 | 0.043 | 6.80E-01 | -0.288 | 0.075 |
|   | 7 | -0.032 | 0.035 | 1.00E+00 | -0.173 | 0.11  |
|   | 8 | -0.051 | 0.043 | 1.00E+00 | -0.237 | 0.136 |
|   | 9 | -0.063 | 0.039 | 9.93E-01 | -0.219 | 0.094 |
| 4 | 1 | 0.019  | 0.066 | 1.00E+00 | -0.252 | 0.289 |
|   | 2 | 0.006  | 0.058 | 1.00E+00 | -0.235 | 0.247 |
|   | 3 | 0.102  | 0.051 | 9.48E-01 | -0.133 | 0.337 |
|   | 5 | -0.015 | 0.063 | 1.00E+00 | -0.269 | 0.239 |
|   | 6 | -0.005 | 0.059 | 1.00E+00 | -0.249 | 0.239 |
|   | 7 | 0.07   | 0.054 | 1.00E+00 | -0.164 | 0.305 |
|   | 8 | 0.051  | 0.059 | 1.00E+00 | -0.195 | 0.297 |
|   | 9 | 0.039  | 0.056 | 1.00E+00 | -0.198 | 0.276 |
| 5 | 1 | 0.034  | 0.063 | 1.00E+00 | -0.223 | 0.29  |
|   | 2 | 0.021  | 0.055 | 1.00E+00 | -0.199 | 0.241 |
|   | 3 | 0.117  | 0.048 | 7.07E-01 | -0.088 | 0.322 |
|   | 4 | 0.015  | 0.063 | 1.00E+00 | -0.239 | 0.269 |
|   | 6 | 0.01   | 0.056 | 1.00E+00 | -0.214 | 0.234 |
|   | 7 | 0.085  | 0.051 | 9.89E-01 | -0.123 | 0.293 |
|   | 8 | 0.066  | 0.056 | 1.00E+00 | -0.16  | 0.293 |
|   | 9 | 0.054  | 0.053 | 1.00E+00 | -0.159 | 0.267 |
| 6 | 1 | 0.024  | 0.06  | 1.00E+00 | -0.223 | 0.27  |
|   | 2 | 0.011  | 0.051 | 1.00E+00 | -0.192 | 0.214 |
|   | 3 | 0.107  | 0.043 | 6.80E-01 | -0.075 | 0.288 |
|   | 4 | 0.005  | 0.059 | 1.00E+00 | -0.239 | 0.249 |
|   | 5 | -0.01  | 0.056 | 1.00E+00 | -0.234 | 0.214 |
|   | 7 | 0.075  | 0.046 | 9.93E-01 | -0.112 | 0.262 |
|   | 8 | 0.056  | 0.052 | 1.00E+00 | -0.155 | 0.267 |
|   | 9 | 0.044  | 0.049 | 1.00E+00 | -0.15  | 0.238 |
| 7 | 1 | -0.052 | 0.054 | 1.00E+00 | -0.289 | 0.186 |
|   | 2 | -0.064 | 0.045 | 9.99E-01 | -0.244 | 0.115 |
|   | 3 | 0.032  | 0.035 | 1.00E+00 | -0.11  | 0.173 |
|   | 4 | -0.07  | 0.054 | 1.00E+00 | -0.305 | 0.164 |
|   | 5 | -0.085 | 0.051 | 9.89E-01 | -0.293 | 0.123 |
|   | 6 | -0.075 | 0.046 | 9.93E-01 | -0.262 | 0.112 |
|   | 8 | -0.019 | 0.046 | 1.00E+00 | -0.21  | 0.172 |
|   | 9 | -0.031 | 0.042 | 1.00E+00 | -0.197 | 0.135 |
| 8 | 1 | -0.033 | 0.059 | 1.00E+00 | -0.281 | 0.216 |
|   | 2 | -0.045 | 0.051 | 1.00E+00 | -0.251 | 0.16  |
|   | 3 | 0.051  | 0.043 | 1.00E+00 | -0.136 | 0.237 |
|   | 4 | -0.051 | 0.059 | 1.00E+00 | -0.297 | 0.195 |

---

|     |     |   |   |        |       |          |        |       |
|-----|-----|---|---|--------|-------|----------|--------|-------|
|     |     |   | 5 | -0.066 | 0.056 | 1.00E+00 | -0.293 | 0.16  |
|     |     |   | 6 | -0.056 | 0.052 | 1.00E+00 | -0.267 | 0.155 |
|     |     |   | 7 | 0.019  | 0.046 | 1.00E+00 | -0.172 | 0.21  |
|     |     |   | 9 | -0.012 | 0.048 | 1.00E+00 | -0.21  | 0.185 |
|     |     | 9 | 1 | -0.02  | 0.056 | 1.00E+00 | -0.26  | 0.219 |
|     |     |   | 2 | -0.033 | 0.047 | 1.00E+00 | -0.22  | 0.154 |
|     |     |   | 3 | 0.063  | 0.039 | 9.93E-01 | -0.094 | 0.219 |
|     |     |   | 4 | -0.039 | 0.056 | 1.00E+00 | -0.276 | 0.198 |
|     |     |   | 5 | -0.054 | 0.053 | 1.00E+00 | -0.267 | 0.159 |
|     |     |   | 6 | -0.044 | 0.049 | 1.00E+00 | -0.238 | 0.15  |
|     |     |   | 7 | 0.031  | 0.042 | 1.00E+00 | -0.135 | 0.197 |
|     |     |   | 8 | 0.012  | 0.048 | 1.00E+00 | -0.185 | 0.21  |
| Cit | LSD | 1 | 2 | 0.033  | 0.059 | 5.80E-01 | -0.085 | 0.15  |
|     |     |   | 3 | -0.071 | 0.059 | 2.28E-01 | -0.189 | 0.046 |
|     |     |   | 4 | 0.02   | 0.061 | 7.43E-01 | -0.101 | 0.141 |
|     |     |   | 5 | 0.014  | 0.059 | 8.07E-01 | -0.103 | 0.132 |
|     |     |   | 6 | -0.001 | 0.059 | 9.86E-01 | -0.118 | 0.116 |
|     |     |   | 7 | 0.004  | 0.059 | 9.46E-01 | -0.113 | 0.121 |
|     |     |   | 8 | -0.025 | 0.061 | 6.76E-01 | -0.147 | 0.096 |
|     |     |   | 9 | 0.014  | 0.059 | 8.06E-01 | -0.103 | 0.132 |
|     |     | 2 | 1 | -0.033 | 0.059 | 5.80E-01 | -0.15  | 0.085 |
|     |     |   | 3 | -0.104 | 0.057 | 7.11E-02 | -0.217 | 0.009 |
|     |     |   | 4 | -0.013 | 0.059 | 8.30E-01 | -0.13  | 0.105 |
|     |     |   | 5 | -0.018 | 0.057 | 7.49E-01 | -0.132 | 0.095 |
|     |     |   | 6 | -0.034 | 0.057 | 5.55E-01 | -0.147 | 0.08  |
|     |     |   | 7 | -0.029 | 0.057 | 6.15E-01 | -0.142 | 0.085 |
|     |     |   | 8 | -0.058 | 0.059 | 3.26E-01 | -0.175 | 0.059 |
|     |     |   | 9 | -0.018 | 0.057 | 7.50E-01 | -0.131 | 0.095 |
|     |     | 3 | 1 | 0.071  | 0.059 | 2.28E-01 | -0.046 | 0.189 |
|     |     |   | 2 | 0.104  | 0.057 | 7.11E-02 | -0.009 | 0.217 |
|     |     |   | 4 | 0.091  | 0.059 | 1.24E-01 | -0.026 | 0.209 |
|     |     |   | 5 | 0.086  | 0.057 | 1.35E-01 | -0.027 | 0.199 |
|     |     |   | 6 | 0.07   | 0.057 | 2.19E-01 | -0.043 | 0.184 |
|     |     |   | 7 | 0.075  | 0.057 | 1.88E-01 | -0.038 | 0.189 |
|     |     |   | 8 | 0.046  | 0.059 | 4.35E-01 | -0.071 | 0.163 |
|     |     |   | 9 | 0.086  | 0.057 | 1.34E-01 | -0.027 | 0.199 |
|     |     | 4 | 1 | -0.02  | 0.061 | 7.43E-01 | -0.141 | 0.101 |
|     |     |   | 2 | 0.013  | 0.059 | 8.30E-01 | -0.105 | 0.13  |
|     |     |   | 3 | -0.091 | 0.059 | 1.24E-01 | -0.209 | 0.026 |
|     |     |   | 5 | -0.006 | 0.059 | 9.25E-01 | -0.123 | 0.112 |
|     |     |   | 6 | -0.021 | 0.059 | 7.22E-01 | -0.138 | 0.096 |



---

|   |   |        |       |          |        |       |
|---|---|--------|-------|----------|--------|-------|
|   | 7 | -0.016 | 0.059 | 7.86E-01 | -0.133 | 0.101 |
|   | 8 | -0.045 | 0.061 | 4.57E-01 | -0.166 | 0.076 |
|   | 9 | -0.005 | 0.059 | 9.26E-01 | -0.123 | 0.112 |
| 5 | 1 | -0.014 | 0.059 | 8.07E-01 | -0.132 | 0.103 |
|   | 2 | 0.018  | 0.057 | 7.49E-01 | -0.095 | 0.132 |
|   | 3 | -0.086 | 0.057 | 1.35E-01 | -0.199 | 0.027 |
|   | 4 | 0.006  | 0.059 | 9.25E-01 | -0.112 | 0.123 |
|   | 6 | -0.015 | 0.057 | 7.87E-01 | -0.129 | 0.098 |
|   | 7 | -0.01  | 0.057 | 8.55E-01 | -0.124 | 0.103 |
|   | 8 | -0.04  | 0.059 | 5.00E-01 | -0.157 | 0.078 |
|   | 9 | 0      | 0.057 | 9.98E-01 | -0.113 | 0.113 |
| 6 | 1 | 0.001  | 0.059 | 9.86E-01 | -0.116 | 0.118 |
|   | 2 | 0.034  | 0.057 | 5.55E-01 | -0.08  | 0.147 |
|   | 3 | -0.07  | 0.057 | 2.19E-01 | -0.184 | 0.043 |
|   | 4 | 0.021  | 0.059 | 7.22E-01 | -0.096 | 0.138 |
|   | 5 | 0.015  | 0.057 | 7.87E-01 | -0.098 | 0.129 |
|   | 7 | 0.005  | 0.057 | 9.30E-01 | -0.108 | 0.118 |
|   | 8 | -0.024 | 0.059 | 6.79E-01 | -0.142 | 0.093 |
|   | 9 | 0.016  | 0.057 | 7.85E-01 | -0.098 | 0.129 |
| 7 | 1 | -0.004 | 0.059 | 9.46E-01 | -0.121 | 0.113 |
|   | 2 | 0.029  | 0.057 | 6.15E-01 | -0.085 | 0.142 |
|   | 3 | -0.075 | 0.057 | 1.88E-01 | -0.189 | 0.038 |
|   | 4 | 0.016  | 0.059 | 7.86E-01 | -0.101 | 0.133 |
|   | 5 | 0.01   | 0.057 | 8.55E-01 | -0.103 | 0.124 |
|   | 6 | -0.005 | 0.057 | 9.30E-01 | -0.118 | 0.108 |
|   | 8 | -0.029 | 0.059 | 6.18E-01 | -0.147 | 0.088 |
|   | 9 | 0.011  | 0.057 | 8.53E-01 | -0.103 | 0.124 |
| 8 | 1 | 0.025  | 0.061 | 6.76E-01 | -0.096 | 0.147 |
|   | 2 | 0.058  | 0.059 | 3.26E-01 | -0.059 | 0.175 |
|   | 3 | -0.046 | 0.059 | 4.35E-01 | -0.163 | 0.071 |
|   | 4 | 0.045  | 0.061 | 4.57E-01 | -0.076 | 0.166 |
|   | 5 | 0.04   | 0.059 | 5.00E-01 | -0.078 | 0.157 |
|   | 6 | 0.024  | 0.059 | 6.79E-01 | -0.093 | 0.142 |
|   | 7 | 0.029  | 0.059 | 6.18E-01 | -0.088 | 0.147 |
|   | 9 | 0.04   | 0.059 | 4.99E-01 | -0.077 | 0.157 |
| 9 | 1 | -0.014 | 0.059 | 8.06E-01 | -0.132 | 0.103 |
|   | 2 | 0.018  | 0.057 | 7.50E-01 | -0.095 | 0.131 |
|   | 3 | -0.086 | 0.057 | 1.34E-01 | -0.199 | 0.027 |
|   | 4 | 0.005  | 0.059 | 9.26E-01 | -0.112 | 0.123 |
|   | 5 | 0      | 0.057 | 9.98E-01 | -0.113 | 0.113 |
|   | 6 | -0.016 | 0.057 | 7.85E-01 | -0.129 | 0.098 |

---

|         |   |   |        |       |          |        |       |
|---------|---|---|--------|-------|----------|--------|-------|
|         |   | 7 | -0.011 | 0.057 | 8.53E-01 | -0.124 | 0.103 |
|         |   | 8 | -0.04  | 0.059 | 4.99E-01 | -0.157 | 0.077 |
| Tamhane | 1 | 2 | 0.033  | 0.054 | 1.00E+00 | -0.19  | 0.255 |
|         |   | 3 | -0.071 | 0.066 | 1.00E+00 | -0.34  | 0.197 |
|         |   | 4 | 0.02   | 0.065 | 1.00E+00 | -0.251 | 0.291 |
|         |   | 5 | 0.014  | 0.057 | 1.00E+00 | -0.216 | 0.245 |
|         |   | 6 | -0.001 | 0.056 | 1.00E+00 | -0.231 | 0.229 |
|         |   | 7 | 0.004  | 0.059 | 1.00E+00 | -0.233 | 0.24  |
|         |   | 8 | -0.025 | 0.057 | 1.00E+00 | -0.26  | 0.209 |
|         |   | 9 | 0.014  | 0.053 | 1.00E+00 | -0.205 | 0.234 |
|         | 2 | 1 | -0.033 | 0.054 | 1.00E+00 | -0.255 | 0.19  |
|         |   | 3 | -0.104 | 0.062 | 9.89E-01 | -0.358 | 0.149 |
|         |   | 4 | -0.013 | 0.061 | 1.00E+00 | -0.27  | 0.244 |
|         |   | 5 | -0.018 | 0.051 | 1.00E+00 | -0.222 | 0.186 |
|         |   | 6 | -0.034 | 0.051 | 1.00E+00 | -0.237 | 0.17  |
|         |   | 7 | -0.029 | 0.053 | 1.00E+00 | -0.242 | 0.184 |
|         |   | 8 | -0.058 | 0.052 | 1.00E+00 | -0.267 | 0.151 |
|         |   | 9 | -0.018 | 0.047 | 1.00E+00 | -0.206 | 0.17  |
|         | 3 | 1 | 0.071  | 0.066 | 1.00E+00 | -0.197 | 0.34  |
|         |   | 2 | 0.104  | 0.062 | 9.89E-01 | -0.149 | 0.358 |
|         |   | 4 | 0.091  | 0.072 | 1.00E+00 | -0.198 | 0.381 |
|         |   | 5 | 0.086  | 0.064 | 1.00E+00 | -0.173 | 0.344 |
|         |   | 6 | 0.07   | 0.064 | 1.00E+00 | -0.188 | 0.329 |
|         |   | 7 | 0.075  | 0.066 | 1.00E+00 | -0.188 | 0.339 |
|         |   | 8 | 0.046  | 0.064 | 1.00E+00 | -0.215 | 0.307 |
|         |   | 9 | 0.086  | 0.061 | 9.99E-01 | -0.166 | 0.337 |
|         | 4 | 1 | -0.02  | 0.065 | 1.00E+00 | -0.291 | 0.251 |
|         |   | 2 | 0.013  | 0.061 | 1.00E+00 | -0.244 | 0.27  |
|         |   | 3 | -0.091 | 0.072 | 1.00E+00 | -0.381 | 0.198 |
|         |   | 5 | -0.006 | 0.063 | 1.00E+00 | -0.267 | 0.256 |
|         |   | 6 | -0.021 | 0.063 | 1.00E+00 | -0.282 | 0.24  |
|         |   | 7 | -0.016 | 0.065 | 1.00E+00 | -0.281 | 0.249 |
|         |   | 8 | -0.045 | 0.063 | 1.00E+00 | -0.31  | 0.219 |
|         |   | 9 | -0.005 | 0.06  | 1.00E+00 | -0.261 | 0.25  |
|         | 5 | 1 | -0.014 | 0.057 | 1.00E+00 | -0.245 | 0.216 |
|         |   | 2 | 0.018  | 0.051 | 1.00E+00 | -0.186 | 0.222 |
|         |   | 3 | -0.086 | 0.064 | 1.00E+00 | -0.344 | 0.173 |
|         |   | 4 | 0.006  | 0.063 | 1.00E+00 | -0.256 | 0.267 |
|         |   | 6 | -0.015 | 0.054 | 1.00E+00 | -0.229 | 0.198 |
|         |   | 7 | -0.01  | 0.056 | 1.00E+00 | -0.232 | 0.211 |
|         |   | 8 | -0.04  | 0.054 | 1.00E+00 | -0.258 | 0.179 |

|     |     |   |   |        |       |          |        |       |
|-----|-----|---|---|--------|-------|----------|--------|-------|
|     |     |   | 9 | 0      | 0.05  | 1.00E+00 | -0.2   | 0.2   |
|     |     | 6 | 1 | 0.001  | 0.056 | 1.00E+00 | -0.229 | 0.231 |
|     |     |   | 2 | 0.034  | 0.051 | 1.00E+00 | -0.17  | 0.237 |
|     |     |   | 3 | -0.07  | 0.064 | 1.00E+00 | -0.329 | 0.188 |
|     |     |   | 4 | 0.021  | 0.063 | 1.00E+00 | -0.24  | 0.282 |
|     |     |   | 5 | 0.015  | 0.054 | 1.00E+00 | -0.198 | 0.229 |
|     |     |   | 7 | 0.005  | 0.056 | 1.00E+00 | -0.216 | 0.226 |
|     |     |   | 8 | -0.024 | 0.054 | 1.00E+00 | -0.242 | 0.193 |
|     |     |   | 9 | 0.016  | 0.05  | 1.00E+00 | -0.184 | 0.215 |
|     |     | 7 | 1 | -0.004 | 0.059 | 1.00E+00 | -0.24  | 0.233 |
|     |     |   | 2 | 0.029  | 0.053 | 1.00E+00 | -0.184 | 0.242 |
|     |     |   | 3 | -0.075 | 0.066 | 1.00E+00 | -0.339 | 0.188 |
|     |     |   | 4 | 0.016  | 0.065 | 1.00E+00 | -0.249 | 0.281 |
|     |     |   | 5 | 0.01   | 0.056 | 1.00E+00 | -0.211 | 0.232 |
|     |     |   | 6 | -0.005 | 0.056 | 1.00E+00 | -0.226 | 0.216 |
|     |     |   | 8 | -0.029 | 0.056 | 1.00E+00 | -0.255 | 0.197 |
|     |     |   | 9 | 0.011  | 0.052 | 1.00E+00 | -0.199 | 0.22  |
|     |     | 8 | 1 | 0.025  | 0.057 | 1.00E+00 | -0.209 | 0.26  |
|     |     |   | 2 | 0.058  | 0.052 | 1.00E+00 | -0.151 | 0.267 |
|     |     |   | 3 | -0.046 | 0.064 | 1.00E+00 | -0.307 | 0.215 |
|     |     |   | 4 | 0.045  | 0.063 | 1.00E+00 | -0.219 | 0.31  |
|     |     |   | 5 | 0.04   | 0.054 | 1.00E+00 | -0.179 | 0.258 |
|     |     |   | 6 | 0.024  | 0.054 | 1.00E+00 | -0.193 | 0.242 |
|     |     |   | 7 | 0.029  | 0.056 | 1.00E+00 | -0.197 | 0.255 |
|     |     |   | 9 | 0.04   | 0.05  | 1.00E+00 | -0.166 | 0.246 |
|     |     | 9 | 1 | -0.014 | 0.053 | 1.00E+00 | -0.234 | 0.205 |
|     |     |   | 2 | 0.018  | 0.047 | 1.00E+00 | -0.17  | 0.206 |
|     |     |   | 3 | -0.086 | 0.061 | 9.99E-01 | -0.337 | 0.166 |
|     |     |   | 4 | 0.005  | 0.06  | 1.00E+00 | -0.25  | 0.261 |
|     |     |   | 5 | 0      | 0.05  | 1.00E+00 | -0.2   | 0.2   |
|     |     |   | 6 | -0.016 | 0.05  | 1.00E+00 | -0.215 | 0.184 |
|     |     |   | 7 | -0.011 | 0.052 | 1.00E+00 | -0.22  | 0.199 |
|     |     |   | 8 | -0.04  | 0.05  | 1.00E+00 | -0.246 | 0.166 |
| HPA | LSD | 1 | 2 | -0.065 | 0.048 | 1.79E-01 | -0.16  | 0.031 |
|     |     |   | 3 | -0.042 | 0.048 | 3.85E-01 | -0.137 | 0.054 |
|     |     |   | 4 | -0.034 | 0.049 | 4.98E-01 | -0.132 | 0.065 |
|     |     |   | 5 | -0.057 | 0.048 | 2.39E-01 | -0.152 | 0.039 |
|     |     |   | 6 | -0.015 | 0.048 | 7.58E-01 | -0.11  | 0.081 |
|     |     |   | 7 | -0.02  | 0.048 | 6.74E-01 | -0.115 | 0.075 |
|     |     |   | 8 | 0.018  | 0.049 | 7.21E-01 | -0.081 | 0.116 |
|     |     |   | 9 | -0.014 | 0.048 | 7.65E-01 | -0.11  | 0.081 |

---

|   |   |        |       |          |          |        |
|---|---|--------|-------|----------|----------|--------|
| 2 | 1 | 0.065  | 0.048 | 1.79E-01 | -0.031   | 0.16   |
|   | 3 | 0.023  | 0.046 | 6.18E-01 | -0.069   | 0.115  |
|   | 4 | 0.031  | 0.048 | 5.16E-01 | -0.064   | 0.126  |
|   | 5 | 0.008  | 0.046 | 8.63E-01 | -0.084   | 0.1    |
|   | 6 | 0.05   | 0.046 | 2.82E-01 | -0.042   | 0.142  |
|   | 7 | 0.045  | 0.046 | 3.36E-01 | -0.047   | 0.137  |
|   | 8 | 0.082  | 0.048 | 8.89E-02 | -0.013   | 0.178  |
|   | 9 | 0.05   | 0.046 | 2.78E-01 | -0.042   | 0.142  |
|   | 3 | 1      | 0.042 | 0.048    | 3.85E-01 | -0.054 |
| 2 |   | -0.023 | 0.046 | 6.18E-01 | -0.115   | 0.069  |
| 4 |   | 0.008  | 0.048 | 8.66E-01 | -0.087   | 0.103  |
| 5 |   | -0.015 | 0.046 | 7.45E-01 | -0.107   | 0.077  |
| 6 |   | 0.027  | 0.046 | 5.61E-01 | -0.065   | 0.119  |
| 7 |   | 0.022  | 0.046 | 6.41E-01 | -0.071   | 0.114  |
| 8 |   | 0.059  | 0.048 | 2.18E-01 | -0.036   | 0.155  |
| 9 |   | 0.027  | 0.046 | 5.55E-01 | -0.065   | 0.119  |
| 4 |   | 1      | 0.034 | 0.049    | 4.98E-01 | -0.065 |
|   | 2 | -0.031 | 0.048 | 5.16E-01 | -0.126   | 0.064  |
|   | 3 | -0.008 | 0.048 | 8.66E-01 | -0.103   | 0.087  |
|   | 5 | -0.023 | 0.048 | 6.29E-01 | -0.118   | 0.072  |
|   | 6 | 0.019  | 0.048 | 6.95E-01 | -0.077   | 0.114  |
|   | 7 | 0.013  | 0.048 | 7.79E-01 | -0.082   | 0.109  |
|   | 8 | 0.051  | 0.049 | 3.02E-01 | -0.047   | 0.15   |
|   | 9 | 0.019  | 0.048 | 6.88E-01 | -0.076   | 0.115  |
|   | 5 | 1      | 0.057 | 0.048    | 2.39E-01 | -0.039 |
| 2 |   | -0.008 | 0.046 | 8.63E-01 | -0.1     | 0.084  |
| 3 |   | 0.015  | 0.046 | 7.45E-01 | -0.077   | 0.107  |
| 4 |   | 0.023  | 0.048 | 6.29E-01 | -0.072   | 0.118  |
| 6 |   | 0.042  | 0.046 | 3.66E-01 | -0.05    | 0.134  |
| 7 |   | 0.037  | 0.046 | 4.30E-01 | -0.055   | 0.129  |
| 8 |   | 0.074  | 0.048 | 1.24E-01 | -0.021   | 0.17   |
| 9 |   | 0.042  | 0.046 | 3.61E-01 | -0.05    | 0.134  |
| 6 |   | 1      | 0.015 | 0.048    | 7.58E-01 | -0.081 |
|   | 2 | -0.05  | 0.046 | 2.82E-01 | -0.142   | 0.042  |
|   | 3 | -0.027 | 0.046 | 5.61E-01 | -0.119   | 0.065  |
|   | 4 | -0.019 | 0.048 | 6.95E-01 | -0.114   | 0.077  |
|   | 5 | -0.042 | 0.046 | 3.66E-01 | -0.134   | 0.05   |
|   | 7 | -0.005 | 0.046 | 9.08E-01 | -0.097   | 0.087  |
|   | 8 | 0.032  | 0.048 | 4.99E-01 | -0.063   | 0.128  |
|   | 9 | 0      | 0.046 | 9.92E-01 | -0.092   | 0.093  |
|   | 7 | 1      | 0.02  | 0.048    | 6.74E-01 | -0.075 |

---

|         |   |   |        |       |          |        |       |
|---------|---|---|--------|-------|----------|--------|-------|
|         |   | 2 | -0.045 | 0.046 | 3.36E-01 | -0.137 | 0.047 |
|         |   | 3 | -0.022 | 0.046 | 6.41E-01 | -0.114 | 0.071 |
|         |   | 4 | -0.013 | 0.048 | 7.79E-01 | -0.109 | 0.082 |
|         |   | 5 | -0.037 | 0.046 | 4.30E-01 | -0.129 | 0.055 |
|         |   | 6 | 0.005  | 0.046 | 9.08E-01 | -0.087 | 0.097 |
|         |   | 8 | 0.038  | 0.048 | 4.31E-01 | -0.058 | 0.133 |
|         |   | 9 | 0.006  | 0.046 | 9.00E-01 | -0.086 | 0.098 |
|         | 8 | 1 | -0.018 | 0.049 | 7.21E-01 | -0.116 | 0.081 |
|         |   | 2 | -0.082 | 0.048 | 8.89E-02 | -0.178 | 0.013 |
|         |   | 3 | -0.059 | 0.048 | 2.18E-01 | -0.155 | 0.036 |
|         |   | 4 | -0.051 | 0.049 | 3.02E-01 | -0.15  | 0.047 |
|         |   | 5 | -0.074 | 0.048 | 1.24E-01 | -0.17  | 0.021 |
|         |   | 6 | -0.032 | 0.048 | 4.99E-01 | -0.128 | 0.063 |
|         |   | 7 | -0.038 | 0.048 | 4.31E-01 | -0.133 | 0.058 |
|         |   | 9 | -0.032 | 0.048 | 5.05E-01 | -0.127 | 0.063 |
|         | 9 | 1 | 0.014  | 0.048 | 7.65E-01 | -0.081 | 0.11  |
|         |   | 2 | -0.05  | 0.046 | 2.78E-01 | -0.142 | 0.042 |
|         |   | 3 | -0.027 | 0.046 | 5.55E-01 | -0.119 | 0.065 |
|         |   | 4 | -0.019 | 0.048 | 6.88E-01 | -0.115 | 0.076 |
|         |   | 5 | -0.042 | 0.046 | 3.61E-01 | -0.134 | 0.05  |
|         |   | 6 | 0      | 0.046 | 9.92E-01 | -0.093 | 0.092 |
|         |   | 7 | -0.006 | 0.046 | 9.00E-01 | -0.098 | 0.086 |
|         |   | 8 | 0.032  | 0.048 | 5.05E-01 | -0.063 | 0.127 |
| Tamhane | 1 | 2 | -0.065 | 0.052 | 1.00E+00 | -0.283 | 0.154 |
|         |   | 3 | -0.042 | 0.05  | 1.00E+00 | -0.249 | 0.166 |
|         |   | 4 | -0.034 | 0.059 | 1.00E+00 | -0.302 | 0.235 |
|         |   | 5 | -0.057 | 0.045 | 1.00E+00 | -0.241 | 0.128 |
|         |   | 6 | -0.015 | 0.028 | 1.00E+00 | -0.148 | 0.118 |
|         |   | 7 | -0.02  | 0.04  | 1.00E+00 | -0.181 | 0.141 |
|         |   | 8 | 0.018  | 0.026 | 1.00E+00 | -0.125 | 0.161 |
|         |   | 9 | -0.014 | 0.031 | 1.00E+00 | -0.147 | 0.119 |
|         | 2 | 1 | 0.065  | 0.052 | 1.00E+00 | -0.154 | 0.283 |
|         |   | 3 | 0.023  | 0.062 | 1.00E+00 | -0.221 | 0.267 |
|         |   | 4 | 0.031  | 0.069 | 1.00E+00 | -0.251 | 0.313 |
|         |   | 5 | 0.008  | 0.058 | 1.00E+00 | -0.224 | 0.24  |
|         |   | 6 | 0.05   | 0.046 | 1.00E+00 | -0.172 | 0.272 |
|         |   | 7 | 0.045  | 0.054 | 1.00E+00 | -0.177 | 0.266 |
|         |   | 8 | 0.082  | 0.045 | 9.84E-01 | -0.145 | 0.31  |
|         |   | 9 | 0.05   | 0.048 | 1.00E+00 | -0.167 | 0.267 |
|         | 3 | 1 | 0.042  | 0.05  | 1.00E+00 | -0.166 | 0.249 |
|         |   | 2 | -0.023 | 0.062 | 1.00E+00 | -0.267 | 0.221 |

---

|   |   |        |       |          |        |       |
|---|---|--------|-------|----------|--------|-------|
|   | 4 | 0.008  | 0.067 | 1.00E+00 | -0.27  | 0.286 |
|   | 5 | -0.015 | 0.056 | 1.00E+00 | -0.238 | 0.208 |
|   | 6 | 0.027  | 0.044 | 1.00E+00 | -0.182 | 0.236 |
|   | 7 | 0.022  | 0.052 | 1.00E+00 | -0.19  | 0.233 |
|   | 8 | 0.059  | 0.042 | 1.00E+00 | -0.155 | 0.274 |
|   | 9 | 0.027  | 0.046 | 1.00E+00 | -0.177 | 0.232 |
| 4 | 1 | 0.034  | 0.059 | 1.00E+00 | -0.235 | 0.302 |
|   | 2 | -0.031 | 0.069 | 1.00E+00 | -0.313 | 0.251 |
|   | 3 | -0.008 | 0.067 | 1.00E+00 | -0.286 | 0.27  |
|   | 5 | -0.023 | 0.064 | 1.00E+00 | -0.294 | 0.247 |
|   | 6 | 0.019  | 0.054 | 1.00E+00 | -0.265 | 0.302 |
|   | 7 | 0.013  | 0.061 | 1.00E+00 | -0.253 | 0.28  |
|   | 8 | 0.051  | 0.053 | 1.00E+00 | -0.241 | 0.343 |
|   | 9 | 0.019  | 0.055 | 1.00E+00 | -0.255 | 0.294 |
| 5 | 1 | 0.057  | 0.045 | 1.00E+00 | -0.128 | 0.241 |
|   | 2 | -0.008 | 0.058 | 1.00E+00 | -0.24  | 0.224 |
|   | 3 | 0.015  | 0.056 | 1.00E+00 | -0.208 | 0.238 |
|   | 4 | 0.023  | 0.064 | 1.00E+00 | -0.247 | 0.294 |
|   | 6 | 0.042  | 0.038 | 1.00E+00 | -0.139 | 0.223 |
|   | 7 | 0.037  | 0.048 | 1.00E+00 | -0.154 | 0.227 |
|   | 8 | 0.074  | 0.037 | 9.56E-01 | -0.112 | 0.261 |
|   | 9 | 0.042  | 0.041 | 1.00E+00 | -0.135 | 0.22  |
| 6 | 1 | 0.015  | 0.028 | 1.00E+00 | -0.118 | 0.148 |
|   | 2 | -0.05  | 0.046 | 1.00E+00 | -0.272 | 0.172 |
|   | 3 | -0.027 | 0.044 | 1.00E+00 | -0.236 | 0.182 |
|   | 4 | -0.019 | 0.054 | 1.00E+00 | -0.302 | 0.265 |
|   | 5 | -0.042 | 0.038 | 1.00E+00 | -0.223 | 0.139 |
|   | 7 | -0.005 | 0.032 | 1.00E+00 | -0.152 | 0.142 |
|   | 8 | 0.032  | 0.011 | 5.41E-01 | -0.022 | 0.087 |
|   | 9 | 0      | 0.021 | 1.00E+00 | -0.087 | 0.088 |
| 7 | 1 | 0.02   | 0.04  | 1.00E+00 | -0.141 | 0.181 |
|   | 2 | -0.045 | 0.054 | 1.00E+00 | -0.266 | 0.177 |
|   | 3 | -0.022 | 0.052 | 1.00E+00 | -0.233 | 0.19  |
|   | 4 | -0.013 | 0.061 | 1.00E+00 | -0.28  | 0.253 |
|   | 5 | -0.037 | 0.048 | 1.00E+00 | -0.227 | 0.154 |
|   | 6 | 0.005  | 0.032 | 1.00E+00 | -0.142 | 0.152 |
|   | 8 | 0.038  | 0.03  | 1.00E+00 | -0.115 | 0.191 |
|   | 9 | 0.006  | 0.035 | 1.00E+00 | -0.141 | 0.153 |
| 8 | 1 | -0.018 | 0.026 | 1.00E+00 | -0.161 | 0.125 |
|   | 2 | -0.082 | 0.045 | 9.84E-01 | -0.31  | 0.145 |
|   | 3 | -0.059 | 0.042 | 1.00E+00 | -0.274 | 0.155 |

---

|     |     |   |   |        |       |          |        |       |
|-----|-----|---|---|--------|-------|----------|--------|-------|
|     |     |   | 4 | -0.051 | 0.053 | 1.00E+00 | -0.343 | 0.241 |
|     |     |   | 5 | -0.074 | 0.037 | 9.56E-01 | -0.261 | 0.112 |
|     |     |   | 6 | -0.032 | 0.011 | 5.41E-01 | -0.087 | 0.022 |
|     |     |   | 7 | -0.038 | 0.03  | 1.00E+00 | -0.191 | 0.115 |
|     |     |   | 9 | -0.032 | 0.018 | 9.89E-01 | -0.122 | 0.058 |
|     |     | 9 | 1 | 0.014  | 0.031 | 1.00E+00 | -0.119 | 0.147 |
|     |     |   | 2 | -0.05  | 0.048 | 1.00E+00 | -0.267 | 0.167 |
|     |     |   | 3 | -0.027 | 0.046 | 1.00E+00 | -0.232 | 0.177 |
|     |     |   | 4 | -0.019 | 0.055 | 1.00E+00 | -0.294 | 0.255 |
|     |     |   | 5 | -0.042 | 0.041 | 1.00E+00 | -0.22  | 0.135 |
|     |     |   | 6 | 0      | 0.021 | 1.00E+00 | -0.088 | 0.087 |
|     |     |   | 7 | -0.006 | 0.035 | 1.00E+00 | -0.153 | 0.141 |
|     |     |   | 8 | 0.032  | 0.018 | 9.89E-01 | -0.058 | 0.122 |
| Hip | LSD | 1 | 2 | -0.067 | 0.043 | 1.22E-01 | -0.152 | 0.018 |
|     |     |   | 3 | 0.006  | 0.043 | 8.93E-01 | -0.079 | 0.091 |
|     |     |   | 4 | -0.044 | 0.044 | 3.19E-01 | -0.132 | 0.044 |
|     |     |   | 5 | 0.021  | 0.043 | 6.17E-01 | -0.064 | 0.106 |
|     |     |   | 6 | -0.066 | 0.043 | 1.23E-01 | -0.152 | 0.019 |
|     |     |   | 7 | 0.008  | 0.043 | 8.48E-01 | -0.077 | 0.093 |
|     |     |   | 8 | -0.021 | 0.044 | 6.36E-01 | -0.109 | 0.067 |
|     |     |   | 9 | -0.049 | 0.043 | 2.57E-01 | -0.134 | 0.036 |
|     |     | 2 | 1 | 0.067  | 0.043 | 1.22E-01 | -0.018 | 0.152 |
|     |     |   | 3 | 0.072  | 0.041 | 8.29E-02 | -0.01  | 0.155 |
|     |     |   | 4 | 0.023  | 0.043 | 5.98E-01 | -0.063 | 0.108 |
|     |     |   | 5 | .088*  | 0.041 | 3.60E-02 | 0.006  | 0.17  |
|     |     |   | 6 | 0      | 0.041 | 9.95E-01 | -0.082 | 0.082 |
|     |     |   | 7 | 0.075  | 0.041 | 7.32E-02 | -0.007 | 0.157 |
|     |     |   | 8 | 0.046  | 0.043 | 2.86E-01 | -0.039 | 0.131 |
|     |     |   | 9 | 0.018  | 0.041 | 6.62E-01 | -0.064 | 0.1   |
|     |     | 3 | 1 | -0.006 | 0.043 | 8.93E-01 | -0.091 | 0.079 |
|     |     |   | 2 | -0.072 | 0.041 | 8.29E-02 | -0.155 | 0.01  |
|     |     |   | 4 | -0.05  | 0.043 | 2.45E-01 | -0.135 | 0.035 |
|     |     |   | 5 | 0.016  | 0.041 | 7.05E-01 | -0.067 | 0.098 |
|     |     |   | 6 | -0.072 | 0.041 | 8.40E-02 | -0.154 | 0.01  |
|     |     |   | 7 | 0.002  | 0.041 | 9.53E-01 | -0.08  | 0.085 |
|     |     |   | 8 | -0.027 | 0.043 | 5.33E-01 | -0.112 | 0.058 |
|     |     |   | 9 | -0.054 | 0.041 | 1.91E-01 | -0.137 | 0.028 |
|     |     | 4 | 1 | 0.044  | 0.044 | 3.19E-01 | -0.044 | 0.132 |
|     |     |   | 2 | -0.023 | 0.043 | 5.98E-01 | -0.108 | 0.063 |
|     |     |   | 3 | 0.05   | 0.043 | 2.45E-01 | -0.035 | 0.135 |
|     |     |   | 5 | 0.066  | 0.043 | 1.29E-01 | -0.02  | 0.151 |

---

|   |   |        |       |          |        |        |
|---|---|--------|-------|----------|--------|--------|
|   | 6 | -0.022 | 0.043 | 6.02E-01 | -0.107 | 0.063  |
|   | 7 | 0.052  | 0.043 | 2.23E-01 | -0.033 | 0.137  |
|   | 8 | 0.023  | 0.044 | 5.99E-01 | -0.065 | 0.111  |
|   | 9 | -0.004 | 0.043 | 9.16E-01 | -0.09  | 0.081  |
| 5 | 1 | -0.021 | 0.043 | 6.17E-01 | -0.106 | 0.064  |
|   | 2 | -.088* | 0.041 | 3.60E-02 | -0.17  | -0.006 |
|   | 3 | -0.016 | 0.041 | 7.05E-01 | -0.098 | 0.067  |
|   | 4 | -0.066 | 0.043 | 1.29E-01 | -0.151 | 0.02   |
|   | 6 | -.088* | 0.041 | 3.66E-02 | -0.17  | -0.006 |
|   | 7 | -0.013 | 0.041 | 7.49E-01 | -0.095 | 0.069  |
|   | 8 | -0.042 | 0.043 | 3.24E-01 | -0.127 | 0.043  |
|   | 9 | -0.07  | 0.041 | 9.34E-02 | -0.152 | 0.012  |
| 6 | 1 | 0.066  | 0.043 | 1.23E-01 | -0.019 | 0.152  |
|   | 2 | 0      | 0.041 | 9.95E-01 | -0.082 | 0.082  |
|   | 3 | 0.072  | 0.041 | 8.40E-02 | -0.01  | 0.154  |
|   | 4 | 0.022  | 0.043 | 6.02E-01 | -0.063 | 0.107  |
|   | 5 | .088*  | 0.041 | 3.66E-02 | 0.006  | 0.17   |
|   | 7 | 0.075  | 0.041 | 7.42E-02 | -0.008 | 0.157  |
|   | 8 | 0.046  | 0.043 | 2.89E-01 | -0.04  | 0.131  |
|   | 9 | 0.018  | 0.041 | 6.67E-01 | -0.064 | 0.1    |
| 7 | 1 | -0.008 | 0.043 | 8.48E-01 | -0.093 | 0.077  |
|   | 2 | -0.075 | 0.041 | 7.32E-02 | -0.157 | 0.007  |
|   | 3 | -0.002 | 0.041 | 9.53E-01 | -0.085 | 0.08   |
|   | 4 | -0.052 | 0.043 | 2.23E-01 | -0.137 | 0.033  |
|   | 5 | 0.013  | 0.041 | 7.49E-01 | -0.069 | 0.095  |
|   | 6 | -0.075 | 0.041 | 7.42E-02 | -0.157 | 0.008  |
|   | 8 | -0.029 | 0.043 | 4.96E-01 | -0.114 | 0.056  |
|   | 9 | -0.057 | 0.041 | 1.72E-01 | -0.139 | 0.025  |
| 8 | 1 | 0.021  | 0.044 | 6.36E-01 | -0.067 | 0.109  |
|   | 2 | -0.046 | 0.043 | 2.86E-01 | -0.131 | 0.039  |
|   | 3 | 0.027  | 0.043 | 5.33E-01 | -0.058 | 0.112  |
|   | 4 | -0.023 | 0.044 | 5.99E-01 | -0.111 | 0.065  |
|   | 5 | 0.042  | 0.043 | 3.24E-01 | -0.043 | 0.127  |
|   | 6 | -0.046 | 0.043 | 2.89E-01 | -0.131 | 0.04   |
|   | 7 | 0.029  | 0.043 | 4.96E-01 | -0.056 | 0.114  |
|   | 9 | -0.028 | 0.043 | 5.17E-01 | -0.113 | 0.057  |
| 9 | 1 | 0.049  | 0.043 | 2.57E-01 | -0.036 | 0.134  |
|   | 2 | -0.018 | 0.041 | 6.62E-01 | -0.1   | 0.064  |
|   | 3 | 0.054  | 0.041 | 1.91E-01 | -0.028 | 0.137  |
|   | 4 | 0.004  | 0.043 | 9.16E-01 | -0.081 | 0.09   |
|   | 5 | 0.07   | 0.041 | 9.34E-02 | -0.012 | 0.152  |

---



|         |   |   |        |       |          |        |       |
|---------|---|---|--------|-------|----------|--------|-------|
|         |   | 6 | -0.018 | 0.041 | 6.67E-01 | -0.1   | 0.064 |
|         |   | 7 | 0.057  | 0.041 | 1.72E-01 | -0.025 | 0.139 |
|         |   | 8 | 0.028  | 0.043 | 5.17E-01 | -0.057 | 0.113 |
| Tamhane | 1 | 2 | -0.067 | 0.04  | 9.90E-01 | -0.234 | 0.101 |
|         |   | 3 | 0.006  | 0.026 | 1.00E+00 | -0.101 | 0.112 |
|         |   | 4 | -0.044 | 0.044 | 1.00E+00 | -0.242 | 0.154 |
|         |   | 5 | 0.021  | 0.024 | 1.00E+00 | -0.08  | 0.123 |
|         |   | 6 | -0.066 | 0.045 | 9.99E-01 | -0.261 | 0.128 |
|         |   | 7 | 0.008  | 0.026 | 1.00E+00 | -0.1   | 0.116 |
|         |   | 8 | -0.021 | 0.036 | 1.00E+00 | -0.178 | 0.136 |
|         |   | 9 | -0.049 | 0.044 | 1.00E+00 | -0.239 | 0.142 |
|         | 2 | 1 | 0.067  | 0.04  | 9.90E-01 | -0.101 | 0.234 |
|         |   | 3 | 0.072  | 0.038 | 9.63E-01 | -0.093 | 0.238 |
|         |   | 4 | 0.023  | 0.052 | 1.00E+00 | -0.188 | 0.233 |
|         |   | 5 | 0.088  | 0.037 | 7.75E-01 | -0.078 | 0.255 |
|         |   | 6 | 0      | 0.053 | 1.00E+00 | -0.21  | 0.211 |
|         |   | 7 | 0.075  | 0.039 | 9.50E-01 | -0.091 | 0.241 |
|         |   | 8 | 0.046  | 0.046 | 1.00E+00 | -0.14  | 0.231 |
|         |   | 9 | 0.018  | 0.052 | 1.00E+00 | -0.19  | 0.226 |
|         | 3 | 1 | -0.006 | 0.026 | 1.00E+00 | -0.112 | 0.101 |
|         |   | 2 | -0.072 | 0.038 | 9.63E-01 | -0.238 | 0.093 |
|         |   | 4 | -0.05  | 0.042 | 1.00E+00 | -0.249 | 0.149 |
|         |   | 5 | 0.016  | 0.022 | 1.00E+00 | -0.071 | 0.103 |
|         |   | 6 | -0.072 | 0.044 | 9.93E-01 | -0.266 | 0.122 |
|         |   | 7 | 0.002  | 0.024 | 1.00E+00 | -0.094 | 0.099 |
|         |   | 8 | -0.027 | 0.035 | 1.00E+00 | -0.182 | 0.128 |
|         |   | 9 | -0.054 | 0.043 | 1.00E+00 | -0.244 | 0.136 |
|         | 4 | 1 | 0.044  | 0.044 | 1.00E+00 | -0.154 | 0.242 |
|         |   | 2 | -0.023 | 0.052 | 1.00E+00 | -0.233 | 0.188 |
|         |   | 3 | 0.05   | 0.042 | 1.00E+00 | -0.149 | 0.249 |
|         |   | 5 | 0.066  | 0.041 | 9.97E-01 | -0.136 | 0.267 |
|         |   | 6 | -0.022 | 0.056 | 1.00E+00 | -0.247 | 0.203 |
|         |   | 7 | 0.052  | 0.043 | 1.00E+00 | -0.146 | 0.251 |
|         |   | 8 | 0.023  | 0.049 | 1.00E+00 | -0.183 | 0.23  |
|         |   | 9 | -0.004 | 0.055 | 1.00E+00 | -0.227 | 0.218 |
|         | 5 | 1 | -0.021 | 0.024 | 1.00E+00 | -0.123 | 0.08  |
|         |   | 2 | -0.088 | 0.037 | 7.75E-01 | -0.255 | 0.078 |
|         |   | 3 | -0.016 | 0.022 | 1.00E+00 | -0.103 | 0.071 |
|         |   | 4 | -0.066 | 0.041 | 9.97E-01 | -0.267 | 0.136 |
|         |   | 6 | -0.088 | 0.042 | 9.25E-01 | -0.283 | 0.108 |
|         |   | 7 | -0.013 | 0.022 | 1.00E+00 | -0.103 | 0.076 |

|     |     |   |   |        |       |          |        |        |
|-----|-----|---|---|--------|-------|----------|--------|--------|
|     |     |   | 8 | -0.042 | 0.033 | 1.00E+00 | -0.198 | 0.114  |
|     |     |   | 9 | -0.07  | 0.042 | 9.93E-01 | -0.262 | 0.121  |
|     |     | 6 | 1 | 0.066  | 0.045 | 9.99E-01 | -0.128 | 0.261  |
|     |     |   | 2 | 0      | 0.053 | 1.00E+00 | -0.211 | 0.21   |
|     |     |   | 3 | 0.072  | 0.044 | 9.93E-01 | -0.122 | 0.266  |
|     |     |   | 4 | 0.022  | 0.056 | 1.00E+00 | -0.203 | 0.247  |
|     |     |   | 5 | 0.088  | 0.042 | 9.25E-01 | -0.108 | 0.283  |
|     |     |   | 7 | 0.075  | 0.044 | 9.90E-01 | -0.119 | 0.268  |
|     |     |   | 8 | 0.046  | 0.05  | 1.00E+00 | -0.159 | 0.251  |
|     |     |   | 9 | 0.018  | 0.056 | 1.00E+00 | -0.205 | 0.24   |
|     |     | 7 | 1 | -0.008 | 0.026 | 1.00E+00 | -0.116 | 0.1    |
|     |     |   | 2 | -0.075 | 0.039 | 9.50E-01 | -0.241 | 0.091  |
|     |     |   | 3 | -0.002 | 0.024 | 1.00E+00 | -0.099 | 0.094  |
|     |     |   | 4 | -0.052 | 0.043 | 1.00E+00 | -0.251 | 0.146  |
|     |     |   | 5 | 0.013  | 0.022 | 1.00E+00 | -0.076 | 0.103  |
|     |     |   | 6 | -0.075 | 0.044 | 9.90E-01 | -0.268 | 0.119  |
|     |     |   | 8 | -0.029 | 0.035 | 1.00E+00 | -0.184 | 0.126  |
|     |     |   | 9 | -0.057 | 0.043 | 1.00E+00 | -0.247 | 0.133  |
|     |     | 8 | 1 | 0.021  | 0.036 | 1.00E+00 | -0.136 | 0.178  |
|     |     |   | 2 | -0.046 | 0.046 | 1.00E+00 | -0.231 | 0.14   |
|     |     |   | 3 | 0.027  | 0.035 | 1.00E+00 | -0.128 | 0.182  |
|     |     |   | 4 | -0.023 | 0.049 | 1.00E+00 | -0.23  | 0.183  |
|     |     |   | 5 | 0.042  | 0.033 | 1.00E+00 | -0.114 | 0.198  |
|     |     |   | 6 | -0.046 | 0.05  | 1.00E+00 | -0.251 | 0.159  |
|     |     |   | 7 | 0.029  | 0.035 | 1.00E+00 | -0.126 | 0.184  |
|     |     |   | 9 | -0.028 | 0.05  | 1.00E+00 | -0.23  | 0.174  |
|     |     | 9 | 1 | 0.049  | 0.044 | 1.00E+00 | -0.142 | 0.239  |
|     |     |   | 2 | -0.018 | 0.052 | 1.00E+00 | -0.226 | 0.19   |
|     |     |   | 3 | 0.054  | 0.043 | 1.00E+00 | -0.136 | 0.244  |
|     |     |   | 4 | 0.004  | 0.055 | 1.00E+00 | -0.218 | 0.227  |
|     |     |   | 5 | 0.07   | 0.042 | 9.93E-01 | -0.121 | 0.262  |
|     |     |   | 6 | -0.018 | 0.056 | 1.00E+00 | -0.24  | 0.205  |
|     |     |   | 7 | 0.057  | 0.043 | 1.00E+00 | -0.133 | 0.247  |
|     |     |   | 8 | 0.028  | 0.05  | 1.00E+00 | -0.174 | 0.23   |
| Bet | LSD | 1 | 2 | -117*  | 0.041 | 5.72E-03 | -0.199 | -0.035 |
|     |     |   | 3 | -0.055 | 0.041 | 1.88E-01 | -0.137 | 0.027  |
|     |     |   | 4 | -0.019 | 0.042 | 6.58E-01 | -0.103 | 0.066  |
|     |     |   | 5 | -153*  | 0.041 | 4.34E-04 | -0.235 | -0.071 |
|     |     |   | 6 | -0.058 | 0.041 | 1.59E-01 | -0.14  | 0.023  |
|     |     |   | 7 | -0.034 | 0.041 | 4.04E-01 | -0.116 | 0.048  |
|     |     |   | 8 | -0.018 | 0.042 | 6.80E-01 | -0.102 | 0.067  |

---

|   |   |        |       |          |        |        |
|---|---|--------|-------|----------|--------|--------|
|   | 9 | -0.015 | 0.041 | 7.13E-01 | -0.097 | 0.067  |
| 2 | 1 | .117*  | 0.041 | 5.72E-03 | 0.035  | 0.199  |
|   | 3 | 0.063  | 0.04  | 1.18E-01 | -0.016 | 0.142  |
|   | 4 | .099*  | 0.041 | 1.92E-02 | 0.017  | 0.181  |
|   | 5 | -0.035 | 0.04  | 3.78E-01 | -0.114 | 0.044  |
|   | 6 | 0.059  | 0.04  | 1.41E-01 | -0.02  | 0.138  |
|   | 7 | .083*  | 0.04  | 4.02E-02 | 0.004  | 0.162  |
|   | 8 | .100*  | 0.041 | 1.77E-02 | 0.018  | 0.182  |
|   | 9 | .102*  | 0.04  | 1.22E-02 | 0.023  | 0.181  |
| 3 | 1 | 0.055  | 0.041 | 1.88E-01 | -0.027 | 0.137  |
|   | 2 | -0.063 | 0.04  | 1.18E-01 | -0.142 | 0.016  |
|   | 4 | 0.036  | 0.041 | 3.86E-01 | -0.046 | 0.118  |
|   | 5 | -.098* | 0.04  | 1.61E-02 | -0.177 | -0.019 |
|   | 6 | -0.004 | 0.04  | 9.23E-01 | -0.083 | 0.075  |
|   | 7 | 0.02   | 0.04  | 6.12E-01 | -0.059 | 0.099  |
|   | 8 | 0.037  | 0.041 | 3.69E-01 | -0.045 | 0.119  |
|   | 9 | 0.039  | 0.04  | 3.23E-01 | -0.04  | 0.119  |
| 4 | 1 | 0.019  | 0.042 | 6.58E-01 | -0.066 | 0.103  |
|   | 2 | -.099* | 0.041 | 1.92E-02 | -0.181 | -0.017 |
|   | 3 | -0.036 | 0.041 | 3.86E-01 | -0.118 | 0.046  |
|   | 5 | -.134* | 0.041 | 1.81E-03 | -0.216 | -0.052 |
|   | 6 | -0.04  | 0.041 | 3.37E-01 | -0.122 | 0.042  |
|   | 7 | -0.016 | 0.041 | 7.05E-01 | -0.098 | 0.066  |
|   | 8 | 0.001  | 0.042 | 9.76E-01 | -0.083 | 0.086  |
|   | 9 | 0.004  | 0.041 | 9.29E-01 | -0.078 | 0.086  |
| 5 | 1 | .153*  | 0.041 | 4.34E-04 | 0.071  | 0.235  |
|   | 2 | 0.035  | 0.04  | 3.78E-01 | -0.044 | 0.114  |
|   | 3 | .098*  | 0.04  | 1.61E-02 | 0.019  | 0.177  |
|   | 4 | .134*  | 0.041 | 1.81E-03 | 0.052  | 0.216  |
|   | 6 | .094*  | 0.04  | 2.06E-02 | 0.015  | 0.173  |
|   | 7 | .118*  | 0.04  | 4.09E-03 | 0.039  | 0.197  |
|   | 8 | .135*  | 0.041 | 1.65E-03 | 0.053  | 0.217  |
|   | 9 | .137*  | 0.04  | 9.63E-04 | 0.058  | 0.217  |
| 6 | 1 | 0.058  | 0.041 | 1.59E-01 | -0.023 | 0.14   |
|   | 2 | -0.059 | 0.04  | 1.41E-01 | -0.138 | 0.02   |
|   | 3 | 0.004  | 0.04  | 9.23E-01 | -0.075 | 0.083  |
|   | 4 | 0.04   | 0.041 | 3.37E-01 | -0.042 | 0.122  |
|   | 5 | -.094* | 0.04  | 2.06E-02 | -0.173 | -0.015 |
|   | 7 | 0.024  | 0.04  | 5.46E-01 | -0.055 | 0.103  |
|   | 8 | 0.041  | 0.041 | 3.22E-01 | -0.041 | 0.123  |
|   | 9 | 0.043  | 0.04  | 2.78E-01 | -0.036 | 0.122  |

---

|         |   |   |         |       |          |        |        |
|---------|---|---|---------|-------|----------|--------|--------|
|         | 7 | 1 | 0.034   | 0.041 | 4.04E-01 | -0.048 | 0.116  |
|         |   | 2 | -0.083* | 0.04  | 4.02E-02 | -0.162 | -0.004 |
|         |   | 3 | -0.02   | 0.04  | 6.12E-01 | -0.099 | 0.059  |
|         |   | 4 | 0.016   | 0.041 | 7.05E-01 | -0.066 | 0.098  |
|         |   | 5 | -0.118* | 0.04  | 4.09E-03 | -0.197 | -0.039 |
|         |   | 6 | -0.024  | 0.04  | 5.46E-01 | -0.103 | 0.055  |
|         |   | 8 | 0.017   | 0.041 | 6.82E-01 | -0.065 | 0.099  |
|         |   | 9 | 0.019   | 0.04  | 6.28E-01 | -0.06  | 0.098  |
|         | 8 | 1 | 0.018   | 0.042 | 6.80E-01 | -0.067 | 0.102  |
|         |   | 2 | -0.100* | 0.041 | 1.77E-02 | -0.182 | -0.018 |
|         |   | 3 | -0.037  | 0.041 | 3.69E-01 | -0.119 | 0.045  |
|         |   | 4 | -0.001  | 0.042 | 9.76E-01 | -0.086 | 0.083  |
|         |   | 5 | -0.135* | 0.041 | 1.65E-03 | -0.217 | -0.053 |
|         |   | 6 | -0.041  | 0.041 | 3.22E-01 | -0.123 | 0.041  |
|         |   | 7 | -0.017  | 0.041 | 6.82E-01 | -0.099 | 0.065  |
|         |   | 9 | 0.002   | 0.041 | 9.54E-01 | -0.08  | 0.084  |
|         | 9 | 1 | 0.015   | 0.041 | 7.13E-01 | -0.067 | 0.097  |
|         |   | 2 | -0.102* | 0.04  | 1.22E-02 | -0.181 | -0.023 |
|         |   | 3 | -0.039  | 0.04  | 3.23E-01 | -0.119 | 0.04   |
|         |   | 4 | -0.004  | 0.041 | 9.29E-01 | -0.086 | 0.078  |
|         |   | 5 | -0.137* | 0.04  | 9.63E-04 | -0.217 | -0.058 |
|         |   | 6 | -0.043  | 0.04  | 2.78E-01 | -0.122 | 0.036  |
|         |   | 7 | -0.019  | 0.04  | 6.28E-01 | -0.098 | 0.06   |
|         |   | 8 | -0.002  | 0.041 | 9.54E-01 | -0.084 | 0.08   |
| Tamhane | 1 | 2 | -0.117  | 0.047 | 7.14E-01 | -0.334 | 0.099  |
|         |   | 3 | -0.055  | 0.028 | 9.47E-01 | -0.173 | 0.064  |
|         |   | 4 | -0.019  | 0.027 | 1.00E+00 | -0.136 | 0.098  |
|         |   | 5 | -0.153  | 0.049 | 4.02E-01 | -0.384 | 0.079  |
|         |   | 6 | -0.058  | 0.022 | 4.74E-01 | -0.145 | 0.028  |
|         |   | 7 | -0.034  | 0.027 | 1.00E+00 | -0.146 | 0.077  |
|         |   | 8 | -0.018  | 0.021 | 1.00E+00 | -0.102 | 0.067  |
|         |   | 9 | -0.015  | 0.026 | 1.00E+00 | -0.123 | 0.092  |
|         | 2 | 1 | 0.117   | 0.047 | 7.14E-01 | -0.099 | 0.334  |
|         |   | 3 | 0.063   | 0.05  | 1.00E+00 | -0.151 | 0.277  |
|         |   | 4 | 0.099   | 0.05  | 9.39E-01 | -0.116 | 0.313  |
|         |   | 5 | -0.035  | 0.065 | 1.00E+00 | -0.292 | 0.221  |
|         |   | 6 | 0.059   | 0.047 | 1.00E+00 | -0.156 | 0.274  |
|         |   | 7 | 0.083   | 0.05  | 9.92E-01 | -0.131 | 0.297  |
|         |   | 8 | 0.1     | 0.047 | 9.02E-01 | -0.116 | 0.316  |
|         |   | 9 | 0.102   | 0.049 | 9.08E-01 | -0.111 | 0.316  |
|         | 3 | 1 | 0.055   | 0.028 | 9.47E-01 | -0.064 | 0.173  |

|   |   |        |       |          |        |       |
|---|---|--------|-------|----------|--------|-------|
|   | 2 | -0.063 | 0.05  | 1.00E+00 | -0.277 | 0.151 |
|   | 4 | 0.036  | 0.033 | 1.00E+00 | -0.098 | 0.17  |
|   | 5 | -0.098 | 0.053 | 9.70E-01 | -0.326 | 0.13  |
|   | 6 | -0.004 | 0.029 | 1.00E+00 | -0.123 | 0.115 |
|   | 7 | 0.02   | 0.033 | 1.00E+00 | -0.111 | 0.152 |
|   | 8 | 0.037  | 0.028 | 1.00E+00 | -0.082 | 0.156 |
|   | 9 | 0.039  | 0.033 | 1.00E+00 | -0.09  | 0.169 |
| 4 | 1 | 0.019  | 0.027 | 1.00E+00 | -0.098 | 0.136 |
|   | 2 | -0.099 | 0.05  | 9.39E-01 | -0.313 | 0.116 |
|   | 3 | -0.036 | 0.033 | 1.00E+00 | -0.17  | 0.098 |
|   | 5 | -0.134 | 0.052 | 6.49E-01 | -0.362 | 0.094 |
|   | 6 | -0.04  | 0.028 | 9.99E-01 | -0.157 | 0.078 |
|   | 7 | -0.016 | 0.032 | 1.00E+00 | -0.145 | 0.114 |
|   | 8 | 0.001  | 0.027 | 1.00E+00 | -0.116 | 0.118 |
|   | 9 | 0.004  | 0.031 | 1.00E+00 | -0.124 | 0.131 |
| 5 | 1 | 0.153  | 0.049 | 4.02E-01 | -0.079 | 0.384 |
|   | 2 | 0.035  | 0.065 | 1.00E+00 | -0.221 | 0.292 |
|   | 3 | 0.098  | 0.053 | 9.70E-01 | -0.13  | 0.326 |
|   | 4 | 0.134  | 0.052 | 6.49E-01 | -0.094 | 0.362 |
|   | 6 | 0.094  | 0.05  | 9.70E-01 | -0.136 | 0.324 |
|   | 7 | 0.118  | 0.052 | 8.25E-01 | -0.109 | 0.346 |
|   | 8 | 0.135  | 0.049 | 5.94E-01 | -0.096 | 0.366 |
|   | 9 | 0.137  | 0.052 | 5.94E-01 | -0.09  | 0.365 |
| 6 | 1 | 0.058  | 0.022 | 4.74E-01 | -0.028 | 0.145 |
|   | 2 | -0.059 | 0.047 | 1.00E+00 | -0.274 | 0.156 |
|   | 3 | 0.004  | 0.029 | 1.00E+00 | -0.115 | 0.123 |
|   | 4 | 0.04   | 0.028 | 9.99E-01 | -0.078 | 0.157 |
|   | 5 | -0.094 | 0.05  | 9.70E-01 | -0.324 | 0.136 |
|   | 7 | 0.024  | 0.028 | 1.00E+00 | -0.089 | 0.137 |
|   | 8 | 0.041  | 0.022 | 9.53E-01 | -0.046 | 0.128 |
|   | 9 | 0.043  | 0.027 | 9.94E-01 | -0.066 | 0.152 |
| 7 | 1 | 0.034  | 0.027 | 1.00E+00 | -0.077 | 0.146 |
|   | 2 | -0.083 | 0.05  | 9.92E-01 | -0.297 | 0.131 |
|   | 3 | -0.02  | 0.033 | 1.00E+00 | -0.152 | 0.111 |
|   | 4 | 0.016  | 0.032 | 1.00E+00 | -0.114 | 0.145 |
|   | 5 | -0.118 | 0.052 | 8.25E-01 | -0.346 | 0.109 |
|   | 6 | -0.024 | 0.028 | 1.00E+00 | -0.137 | 0.089 |
|   | 8 | 0.017  | 0.027 | 1.00E+00 | -0.095 | 0.129 |
|   | 9 | 0.019  | 0.031 | 1.00E+00 | -0.105 | 0.143 |
| 8 | 1 | 0.018  | 0.021 | 1.00E+00 | -0.067 | 0.102 |
|   | 2 | -0.1   | 0.047 | 9.02E-01 | -0.316 | 0.116 |

|     |     |   |   |        |       |          |        |        |
|-----|-----|---|---|--------|-------|----------|--------|--------|
|     |     |   | 3 | -0.037 | 0.028 | 1.00E+00 | -0.156 | 0.082  |
|     |     |   | 4 | -0.001 | 0.027 | 1.00E+00 | -0.118 | 0.116  |
|     |     |   | 5 | -0.135 | 0.049 | 5.94E-01 | -0.366 | 0.096  |
|     |     |   | 6 | -0.041 | 0.022 | 9.53E-01 | -0.128 | 0.046  |
|     |     |   | 7 | -0.017 | 0.027 | 1.00E+00 | -0.129 | 0.095  |
|     |     |   | 9 | 0.002  | 0.026 | 1.00E+00 | -0.105 | 0.11   |
|     |     | 9 | 1 | 0.015  | 0.026 | 1.00E+00 | -0.092 | 0.123  |
|     |     |   | 2 | -0.102 | 0.049 | 9.08E-01 | -0.316 | 0.111  |
|     |     |   | 3 | -0.039 | 0.033 | 1.00E+00 | -0.169 | 0.09   |
|     |     |   | 4 | -0.004 | 0.031 | 1.00E+00 | -0.131 | 0.124  |
|     |     |   | 5 | -0.137 | 0.052 | 5.94E-01 | -0.365 | 0.09   |
|     |     |   | 6 | -0.043 | 0.027 | 9.94E-01 | -0.152 | 0.066  |
|     |     |   | 7 | -0.019 | 0.031 | 1.00E+00 | -0.143 | 0.105  |
|     |     |   | 8 | -0.002 | 0.026 | 1.00E+00 | -0.11  | 0.105  |
| Gln | LSD | 1 | 2 | -0.035 | 0.042 | 4.09E-01 | -0.12  | 0.05   |
|     |     |   | 3 | -0.1   | 0.042 | 2.22E-02 | -0.185 | -0.015 |
|     |     |   | 4 | -0.094 | 0.044 | 3.55E-02 | -0.182 | -0.007 |
|     |     |   | 5 | -0.03  | 0.042 | 4.80E-01 | -0.115 | 0.055  |
|     |     |   | 6 | -0.076 | 0.042 | 7.83E-02 | -0.161 | 0.009  |
|     |     |   | 7 | -0.061 | 0.042 | 1.53E-01 | -0.146 | 0.023  |
|     |     |   | 8 | -0.033 | 0.044 | 4.56E-01 | -0.121 | 0.055  |
|     |     |   | 9 | -0.036 | 0.042 | 3.95E-01 | -0.121 | 0.049  |
|     |     | 2 | 1 | 0.035  | 0.042 | 4.09E-01 | -0.05  | 0.12   |
|     |     |   | 3 | -0.064 | 0.041 | 1.22E-01 | -0.146 | 0.018  |
|     |     |   | 4 | -0.059 | 0.042 | 1.70E-01 | -0.144 | 0.026  |
|     |     |   | 5 | 0.005  | 0.041 | 9.00E-01 | -0.077 | 0.087  |
|     |     |   | 6 | -0.041 | 0.041 | 3.25E-01 | -0.123 | 0.041  |
|     |     |   | 7 | -0.026 | 0.041 | 5.26E-01 | -0.108 | 0.056  |
|     |     |   | 8 | 0.002  | 0.042 | 9.55E-01 | -0.083 | 0.087  |
|     |     |   | 9 | -0.001 | 0.041 | 9.80E-01 | -0.083 | 0.081  |
|     |     | 3 | 1 | 0.1    | 0.042 | 2.22E-02 | 0.015  | 0.185  |
|     |     |   | 2 | 0.064  | 0.041 | 1.22E-01 | -0.018 | 0.146  |
|     |     |   | 4 | 0.005  | 0.042 | 9.00E-01 | -0.08  | 0.09   |
|     |     |   | 5 | 0.07   | 0.041 | 9.52E-02 | -0.013 | 0.152  |
|     |     |   | 6 | 0.024  | 0.041 | 5.67E-01 | -0.058 | 0.106  |
|     |     |   | 7 | 0.038  | 0.041 | 3.55E-01 | -0.044 | 0.12   |
|     |     |   | 8 | 0.067  | 0.042 | 1.21E-01 | -0.018 | 0.152  |
|     |     |   | 9 | 0.063  | 0.041 | 1.28E-01 | -0.019 | 0.145  |
|     |     | 4 | 1 | 0.094  | 0.044 | 3.55E-02 | 0.007  | 0.182  |
|     |     |   | 2 | 0.059  | 0.042 | 1.70E-01 | -0.026 | 0.144  |
|     |     |   | 3 | -0.005 | 0.042 | 9.00E-01 | -0.09  | 0.08   |

---

|   |   |        |       |          |        |       |
|---|---|--------|-------|----------|--------|-------|
|   | 5 | 0.064  | 0.042 | 1.36E-01 | -0.021 | 0.149 |
|   | 6 | 0.018  | 0.042 | 6.68E-01 | -0.067 | 0.103 |
|   | 7 | 0.033  | 0.042 | 4.42E-01 | -0.052 | 0.118 |
|   | 8 | 0.061  | 0.044 | 1.66E-01 | -0.026 | 0.149 |
|   | 9 | 0.058  | 0.042 | 1.77E-01 | -0.027 | 0.143 |
| 5 | 1 | 0.03   | 0.042 | 4.80E-01 | -0.055 | 0.115 |
|   | 2 | -0.005 | 0.041 | 9.00E-01 | -0.087 | 0.077 |
|   | 3 | -0.07  | 0.041 | 9.52E-02 | -0.152 | 0.013 |
|   | 4 | -0.064 | 0.042 | 1.36E-01 | -0.149 | 0.021 |
|   | 6 | -0.046 | 0.041 | 2.68E-01 | -0.128 | 0.036 |
|   | 7 | -0.031 | 0.041 | 4.48E-01 | -0.113 | 0.051 |
|   | 8 | -0.003 | 0.042 | 9.48E-01 | -0.088 | 0.082 |
|   | 9 | -0.006 | 0.041 | 8.80E-01 | -0.088 | 0.076 |
| 6 | 1 | 0.076  | 0.042 | 7.83E-02 | -0.009 | 0.161 |
|   | 2 | 0.041  | 0.041 | 3.25E-01 | -0.041 | 0.123 |
|   | 3 | -0.024 | 0.041 | 5.67E-01 | -0.106 | 0.058 |
|   | 4 | -0.018 | 0.042 | 6.68E-01 | -0.103 | 0.067 |
|   | 5 | 0.046  | 0.041 | 2.68E-01 | -0.036 | 0.128 |
|   | 7 | 0.015  | 0.041 | 7.23E-01 | -0.067 | 0.097 |
|   | 8 | 0.043  | 0.042 | 3.14E-01 | -0.042 | 0.128 |
|   | 9 | 0.04   | 0.041 | 3.37E-01 | -0.042 | 0.122 |
| 7 | 1 | 0.061  | 0.042 | 1.53E-01 | -0.023 | 0.146 |
|   | 2 | 0.026  | 0.041 | 5.26E-01 | -0.056 | 0.108 |
|   | 3 | -0.038 | 0.041 | 3.55E-01 | -0.12  | 0.044 |
|   | 4 | -0.033 | 0.042 | 4.42E-01 | -0.118 | 0.052 |
|   | 5 | 0.031  | 0.041 | 4.48E-01 | -0.051 | 0.113 |
|   | 6 | -0.015 | 0.041 | 7.23E-01 | -0.097 | 0.067 |
|   | 8 | 0.029  | 0.042 | 5.04E-01 | -0.056 | 0.114 |
|   | 9 | 0.025  | 0.041 | 5.43E-01 | -0.057 | 0.107 |
| 8 | 1 | 0.033  | 0.044 | 4.56E-01 | -0.055 | 0.121 |
|   | 2 | -0.002 | 0.042 | 9.55E-01 | -0.087 | 0.083 |
|   | 3 | -0.067 | 0.042 | 1.21E-01 | -0.152 | 0.018 |
|   | 4 | -0.061 | 0.044 | 1.66E-01 | -0.149 | 0.026 |
|   | 5 | 0.003  | 0.042 | 9.48E-01 | -0.082 | 0.088 |
|   | 6 | -0.043 | 0.042 | 3.14E-01 | -0.128 | 0.042 |
|   | 7 | -0.029 | 0.042 | 5.04E-01 | -0.114 | 0.056 |
|   | 9 | -0.003 | 0.042 | 9.36E-01 | -0.088 | 0.082 |
| 9 | 1 | 0.036  | 0.042 | 3.95E-01 | -0.049 | 0.121 |
|   | 2 | 0.001  | 0.041 | 9.80E-01 | -0.081 | 0.083 |
|   | 3 | -0.063 | 0.041 | 1.28E-01 | -0.145 | 0.019 |
|   | 4 | -0.058 | 0.042 | 1.77E-01 | -0.143 | 0.027 |

---

---

|         |   |   |        |       |          |        |       |
|---------|---|---|--------|-------|----------|--------|-------|
|         |   | 5 | 0.006  | 0.041 | 8.80E-01 | -0.076 | 0.088 |
|         |   | 6 | -0.04  | 0.041 | 3.37E-01 | -0.122 | 0.042 |
|         |   | 7 | -0.025 | 0.041 | 5.43E-01 | -0.107 | 0.057 |
|         |   | 8 | 0.003  | 0.042 | 9.36E-01 | -0.082 | 0.088 |
| Tamhane | 1 | 2 | -0.035 | 0.027 | 1.00E+00 | -0.158 | 0.087 |
|         |   | 3 | -0.1   | 0.048 | 9.36E-01 | -0.333 | 0.134 |
|         |   | 4 | -0.094 | 0.048 | 9.71E-01 | -0.348 | 0.159 |
|         |   | 5 | -0.03  | 0.03  | 1.00E+00 | -0.168 | 0.108 |
|         |   | 6 | -0.076 | 0.026 | 4.55E-01 | -0.193 | 0.04  |
|         |   | 7 | -0.061 | 0.023 | 5.95E-01 | -0.163 | 0.04  |
|         |   | 8 | -0.033 | 0.028 | 1.00E+00 | -0.164 | 0.098 |
|         |   | 9 | -0.036 | 0.021 | 9.82E-01 | -0.123 | 0.05  |
|         | 2 | 1 | 0.035  | 0.027 | 1.00E+00 | -0.087 | 0.158 |
|         |   | 3 | -0.064 | 0.053 | 1.00E+00 | -0.292 | 0.163 |
|         |   | 4 | -0.059 | 0.053 | 1.00E+00 | -0.298 | 0.18  |
|         |   | 5 | 0.005  | 0.038 | 1.00E+00 | -0.146 | 0.156 |
|         |   | 6 | -0.041 | 0.035 | 1.00E+00 | -0.179 | 0.097 |
|         |   | 7 | -0.026 | 0.033 | 1.00E+00 | -0.157 | 0.105 |
|         |   | 8 | 0.002  | 0.036 | 1.00E+00 | -0.142 | 0.147 |
|         |   | 9 | -0.001 | 0.031 | 1.00E+00 | -0.127 | 0.125 |
|         | 3 | 1 | 0.1    | 0.048 | 9.36E-01 | -0.134 | 0.333 |
|         |   | 2 | 0.064  | 0.053 | 1.00E+00 | -0.163 | 0.292 |
|         |   | 4 | 0.005  | 0.067 | 1.00E+00 | -0.263 | 0.274 |
|         |   | 5 | 0.07   | 0.055 | 1.00E+00 | -0.159 | 0.299 |
|         |   | 6 | 0.024  | 0.053 | 1.00E+00 | -0.203 | 0.251 |
|         |   | 7 | 0.038  | 0.051 | 1.00E+00 | -0.189 | 0.265 |
|         |   | 8 | 0.067  | 0.053 | 1.00E+00 | -0.161 | 0.295 |
|         |   | 9 | 0.063  | 0.05  | 1.00E+00 | -0.165 | 0.291 |
|         | 4 | 1 | 0.094  | 0.048 | 9.71E-01 | -0.159 | 0.348 |
|         |   | 2 | 0.059  | 0.053 | 1.00E+00 | -0.18  | 0.298 |
|         |   | 3 | -0.005 | 0.067 | 1.00E+00 | -0.274 | 0.263 |
|         |   | 5 | 0.064  | 0.055 | 1.00E+00 | -0.175 | 0.304 |
|         |   | 6 | 0.018  | 0.053 | 1.00E+00 | -0.221 | 0.258 |
|         |   | 7 | 0.033  | 0.052 | 1.00E+00 | -0.208 | 0.274 |
|         |   | 8 | 0.061  | 0.054 | 1.00E+00 | -0.179 | 0.302 |
|         |   | 9 | 0.058  | 0.05  | 1.00E+00 | -0.186 | 0.302 |
|         | 5 | 1 | 0.03   | 0.03  | 1.00E+00 | -0.108 | 0.168 |
|         |   | 2 | -0.005 | 0.038 | 1.00E+00 | -0.156 | 0.146 |
|         |   | 3 | -0.07  | 0.055 | 1.00E+00 | -0.299 | 0.159 |
|         |   | 4 | -0.064 | 0.055 | 1.00E+00 | -0.304 | 0.175 |
|         |   | 6 | -0.046 | 0.037 | 1.00E+00 | -0.194 | 0.102 |

---



|     |     |   |   |        |       |          |        |       |
|-----|-----|---|---|--------|-------|----------|--------|-------|
|     |     |   | 7 | -0.031 | 0.035 | 1.00E+00 | -0.174 | 0.111 |
|     |     |   | 8 | -0.003 | 0.038 | 1.00E+00 | -0.157 | 0.151 |
|     |     |   | 9 | -0.006 | 0.034 | 1.00E+00 | -0.145 | 0.133 |
|     |     | 6 | 1 | 0.076  | 0.026 | 4.55E-01 | -0.04  | 0.193 |
|     |     |   | 2 | 0.041  | 0.035 | 1.00E+00 | -0.097 | 0.179 |
|     |     |   | 3 | -0.024 | 0.053 | 1.00E+00 | -0.251 | 0.203 |
|     |     |   | 4 | -0.018 | 0.053 | 1.00E+00 | -0.258 | 0.221 |
|     |     |   | 5 | 0.046  | 0.037 | 1.00E+00 | -0.102 | 0.194 |
|     |     |   | 7 | 0.015  | 0.032 | 1.00E+00 | -0.112 | 0.141 |
|     |     |   | 8 | 0.043  | 0.035 | 1.00E+00 | -0.099 | 0.185 |
|     |     |   | 9 | 0.04   | 0.03  | 1.00E+00 | -0.081 | 0.161 |
|     |     | 7 | 1 | 0.061  | 0.023 | 5.95E-01 | -0.04  | 0.163 |
|     |     |   | 2 | 0.026  | 0.033 | 1.00E+00 | -0.105 | 0.157 |
|     |     |   | 3 | -0.038 | 0.051 | 1.00E+00 | -0.265 | 0.189 |
|     |     |   | 4 | -0.033 | 0.052 | 1.00E+00 | -0.274 | 0.208 |
|     |     |   | 5 | 0.031  | 0.035 | 1.00E+00 | -0.111 | 0.174 |
|     |     |   | 6 | -0.015 | 0.032 | 1.00E+00 | -0.141 | 0.112 |
|     |     |   | 8 | 0.029  | 0.033 | 1.00E+00 | -0.107 | 0.164 |
|     |     |   | 9 | 0.025  | 0.027 | 1.00E+00 | -0.084 | 0.134 |
|     |     | 8 | 1 | 0.033  | 0.028 | 1.00E+00 | -0.098 | 0.164 |
|     |     |   | 2 | -0.002 | 0.036 | 1.00E+00 | -0.147 | 0.142 |
|     |     |   | 3 | -0.067 | 0.053 | 1.00E+00 | -0.295 | 0.161 |
|     |     |   | 4 | -0.061 | 0.054 | 1.00E+00 | -0.302 | 0.179 |
|     |     |   | 5 | 0.003  | 0.038 | 1.00E+00 | -0.151 | 0.157 |
|     |     |   | 6 | -0.043 | 0.035 | 1.00E+00 | -0.185 | 0.099 |
|     |     |   | 7 | -0.029 | 0.033 | 1.00E+00 | -0.164 | 0.107 |
|     |     |   | 9 | -0.003 | 0.031 | 1.00E+00 | -0.134 | 0.128 |
|     |     | 9 | 1 | 0.036  | 0.021 | 9.82E-01 | -0.05  | 0.123 |
|     |     |   | 2 | 0.001  | 0.031 | 1.00E+00 | -0.125 | 0.127 |
|     |     |   | 3 | -0.063 | 0.05  | 1.00E+00 | -0.291 | 0.165 |
|     |     |   | 4 | -0.058 | 0.05  | 1.00E+00 | -0.302 | 0.186 |
|     |     |   | 5 | 0.006  | 0.034 | 1.00E+00 | -0.133 | 0.145 |
|     |     |   | 6 | -0.04  | 0.03  | 1.00E+00 | -0.161 | 0.081 |
|     |     |   | 7 | -0.025 | 0.027 | 1.00E+00 | -0.134 | 0.084 |
|     |     |   | 8 | 0.003  | 0.031 | 1.00E+00 | -0.128 | 0.134 |
| DMA | LSD | 1 | 2 | 0.023  | 0.031 | 4.60E-01 | -0.039 | 0.085 |
|     |     |   | 3 | 0.047  | 0.031 | 1.36E-01 | -0.015 | 0.109 |
|     |     |   | 4 | 0.01   | 0.032 | 7.66E-01 | -0.055 | 0.074 |
|     |     |   | 5 | .065*  | 0.031 | 4.14E-02 | 0.003  | 0.127 |
|     |     |   | 6 | 0.04   | 0.031 | 1.98E-01 | -0.022 | 0.103 |
|     |     |   | 7 | 0.007  | 0.031 | 8.16E-01 | -0.055 | 0.069 |

---

|   |   |         |       |          |        |        |
|---|---|---------|-------|----------|--------|--------|
|   | 8 | 0.023   | 0.032 | 4.86E-01 | -0.042 | 0.087  |
|   | 9 | 0.059   | 0.031 | 6.05E-02 | -0.003 | 0.122  |
| 2 | 1 | -0.023  | 0.031 | 4.60E-01 | -0.085 | 0.039  |
|   | 3 | 0.024   | 0.03  | 4.29E-01 | -0.036 | 0.084  |
|   | 4 | -0.014  | 0.031 | 6.64E-01 | -0.076 | 0.049  |
|   | 5 | 0.042   | 0.03  | 1.71E-01 | -0.018 | 0.102  |
|   | 6 | 0.017   | 0.03  | 5.66E-01 | -0.043 | 0.077  |
|   | 7 | -0.016  | 0.03  | 5.99E-01 | -0.076 | 0.044  |
|   | 8 | -0.001  | 0.031 | 9.85E-01 | -0.063 | 0.062  |
|   | 9 | 0.036   | 0.03  | 2.31E-01 | -0.024 | 0.096  |
| 3 | 1 | -0.047  | 0.031 | 1.36E-01 | -0.109 | 0.015  |
|   | 2 | -0.024  | 0.03  | 4.29E-01 | -0.084 | 0.036  |
|   | 4 | -0.037  | 0.031 | 2.33E-01 | -0.1   | 0.025  |
|   | 5 | 0.018   | 0.03  | 5.57E-01 | -0.042 | 0.078  |
|   | 6 | -0.007  | 0.03  | 8.28E-01 | -0.067 | 0.053  |
|   | 7 | -0.04   | 0.03  | 1.90E-01 | -0.1   | 0.02   |
|   | 8 | -0.024  | 0.031 | 4.34E-01 | -0.087 | 0.038  |
|   | 9 | 0.012   | 0.03  | 6.80E-01 | -0.048 | 0.072  |
| 4 | 1 | -0.01   | 0.032 | 7.66E-01 | -0.074 | 0.055  |
|   | 2 | 0.014   | 0.031 | 6.64E-01 | -0.049 | 0.076  |
|   | 3 | 0.037   | 0.031 | 2.33E-01 | -0.025 | 0.1    |
|   | 5 | 0.055   | 0.031 | 8.09E-02 | -0.007 | 0.117  |
|   | 6 | 0.031   | 0.031 | 3.24E-01 | -0.031 | 0.093  |
|   | 7 | -0.002  | 0.031 | 9.41E-01 | -0.064 | 0.06   |
|   | 8 | 0.013   | 0.032 | 6.88E-01 | -0.051 | 0.077  |
|   | 9 | 0.05    | 0.031 | 1.14E-01 | -0.012 | 0.112  |
| 5 | 1 | -0.065* | 0.031 | 4.14E-02 | -0.127 | -0.003 |
|   | 2 | -0.042  | 0.03  | 1.71E-01 | -0.102 | 0.018  |
|   | 3 | -0.018  | 0.03  | 5.57E-01 | -0.078 | 0.042  |
|   | 4 | -0.055  | 0.031 | 8.09E-02 | -0.117 | 0.007  |
|   | 6 | -0.024  | 0.03  | 4.21E-01 | -0.084 | 0.036  |
|   | 7 | -0.057  | 0.03  | 6.02E-02 | -0.117 | 0.003  |
|   | 8 | -0.042  | 0.031 | 1.79E-01 | -0.104 | 0.02   |
|   | 9 | -0.005  | 0.03  | 8.60E-01 | -0.065 | 0.055  |
| 6 | 1 | -0.04   | 0.031 | 1.98E-01 | -0.103 | 0.022  |
|   | 2 | -0.017  | 0.03  | 5.66E-01 | -0.077 | 0.043  |
|   | 3 | 0.007   | 0.03  | 8.28E-01 | -0.053 | 0.067  |
|   | 4 | -0.031  | 0.031 | 3.24E-01 | -0.093 | 0.031  |
|   | 5 | 0.024   | 0.03  | 4.21E-01 | -0.036 | 0.084  |
|   | 7 | -0.033  | 0.03  | 2.73E-01 | -0.093 | 0.027  |
|   | 8 | -0.018  | 0.031 | 5.66E-01 | -0.08  | 0.044  |

---

|         |   |   |        |       |          |        |       |
|---------|---|---|--------|-------|----------|--------|-------|
|         |   | 9 | 0.019  | 0.03  | 5.29E-01 | -0.041 | 0.079 |
|         | 7 | 1 | -0.007 | 0.031 | 8.16E-01 | -0.069 | 0.055 |
|         |   | 2 | 0.016  | 0.03  | 5.99E-01 | -0.044 | 0.076 |
|         |   | 3 | 0.04   | 0.03  | 1.90E-01 | -0.02  | 0.1   |
|         |   | 4 | 0.002  | 0.031 | 9.41E-01 | -0.06  | 0.064 |
|         |   | 5 | 0.057  | 0.03  | 6.02E-02 | -0.003 | 0.117 |
|         |   | 6 | 0.033  | 0.03  | 2.73E-01 | -0.027 | 0.093 |
|         |   | 8 | 0.015  | 0.031 | 6.25E-01 | -0.047 | 0.077 |
|         |   | 9 | 0.052  | 0.03  | 8.73E-02 | -0.008 | 0.112 |
|         | 8 | 1 | -0.023 | 0.032 | 4.86E-01 | -0.087 | 0.042 |
|         |   | 2 | 0.001  | 0.031 | 9.85E-01 | -0.062 | 0.063 |
|         |   | 3 | 0.024  | 0.031 | 4.34E-01 | -0.038 | 0.087 |
|         |   | 4 | -0.013 | 0.032 | 6.88E-01 | -0.077 | 0.051 |
|         |   | 5 | 0.042  | 0.031 | 1.79E-01 | -0.02  | 0.104 |
|         |   | 6 | 0.018  | 0.031 | 5.66E-01 | -0.044 | 0.08  |
|         |   | 7 | -0.015 | 0.031 | 6.25E-01 | -0.077 | 0.047 |
|         |   | 9 | 0.037  | 0.031 | 2.39E-01 | -0.025 | 0.099 |
|         | 9 | 1 | -0.059 | 0.031 | 6.05E-02 | -0.122 | 0.003 |
|         |   | 2 | -0.036 | 0.03  | 2.31E-01 | -0.096 | 0.024 |
|         |   | 3 | -0.012 | 0.03  | 6.80E-01 | -0.072 | 0.048 |
|         |   | 4 | -0.05  | 0.031 | 1.14E-01 | -0.112 | 0.012 |
|         |   | 5 | 0.005  | 0.03  | 8.60E-01 | -0.055 | 0.065 |
|         |   | 6 | -0.019 | 0.03  | 5.29E-01 | -0.079 | 0.041 |
|         |   | 7 | -0.052 | 0.03  | 8.73E-02 | -0.112 | 0.008 |
|         |   | 8 | -0.037 | 0.031 | 2.39E-01 | -0.099 | 0.025 |
| Tamhane | 1 | 2 | 0.023  | 0.042 | 1.00E+00 | -0.148 | 0.195 |
|         |   | 3 | 0.047  | 0.033 | 1.00E+00 | -0.12  | 0.214 |
|         |   | 4 | 0.01   | 0.045 | 1.00E+00 | -0.177 | 0.196 |
|         |   | 5 | 0.065  | 0.033 | 9.66E-01 | -0.104 | 0.234 |
|         |   | 6 | 0.04   | 0.033 | 1.00E+00 | -0.129 | 0.21  |
|         |   | 7 | 0.007  | 0.044 | 1.00E+00 | -0.171 | 0.186 |
|         |   | 8 | 0.023  | 0.038 | 1.00E+00 | -0.141 | 0.186 |
|         |   | 9 | 0.059  | 0.032 | 9.86E-01 | -0.112 | 0.23  |
|         | 2 | 1 | -0.023 | 0.042 | 1.00E+00 | -0.195 | 0.148 |
|         |   | 3 | 0.024  | 0.029 | 1.00E+00 | -0.111 | 0.159 |
|         |   | 4 | -0.014 | 0.043 | 1.00E+00 | -0.188 | 0.161 |
|         |   | 5 | 0.042  | 0.029 | 9.99E-01 | -0.094 | 0.177 |
|         |   | 6 | 0.017  | 0.029 | 1.00E+00 | -0.119 | 0.153 |
|         |   | 7 | -0.016 | 0.041 | 1.00E+00 | -0.18  | 0.148 |
|         |   | 8 | -0.001 | 0.035 | 1.00E+00 | -0.143 | 0.141 |
|         |   | 9 | 0.036  | 0.028 | 1.00E+00 | -0.101 | 0.173 |

|   |   |        |        |          |          |        |
|---|---|--------|--------|----------|----------|--------|
| 3 | 1 | -0.047 | 0.033  | 1.00E+00 | -0.214   | 0.12   |
|   | 2 | -0.024 | 0.029  | 1.00E+00 | -0.159   | 0.111  |
|   | 4 | -0.037 | 0.034  | 1.00E+00 | -0.208   | 0.134  |
|   | 5 | 0.018  | 0.013  | 9.99E-01 | -0.032   | 0.068  |
|   | 6 | -0.007 | 0.013  | 1.00E+00 | -0.057   | 0.043  |
|   | 7 | -0.04  | 0.032  | 1.00E+00 | -0.19    | 0.111  |
|   | 8 | -0.024 | 0.023  | 1.00E+00 | -0.133   | 0.084  |
|   | 9 | 0.012  | 0.012  | 1.00E+00 | -0.035   | 0.06   |
|   | 4 | 1      | -0.01  | 0.045    | 1.00E+00 | -0.196 |
| 2 |   | 0.014  | 0.043  | 1.00E+00 | -0.161   | 0.188  |
| 3 |   | 0.037  | 0.034  | 1.00E+00 | -0.134   | 0.208  |
| 5 |   | 0.055  | 0.033  | 9.96E-01 | -0.118   | 0.228  |
| 6 |   | 0.031  | 0.033  | 1.00E+00 | -0.142   | 0.204  |
| 7 |   | -0.002 | 0.045  | 1.00E+00 | -0.183   | 0.178  |
| 8 |   | 0.013  | 0.039  | 1.00E+00 | -0.154   | 0.18   |
| 9 |   | 0.05   | 0.033  | 9.99E-01 | -0.125   | 0.225  |
| 5 |   | 1      | -0.065 | 0.033    | 9.66E-01 | -0.234 |
|   | 2 | -0.042 | 0.029  | 9.99E-01 | -0.177   | 0.094  |
|   | 3 | -0.018 | 0.013  | 9.99E-01 | -0.068   | 0.032  |
|   | 4 | -0.055 | 0.033  | 9.96E-01 | -0.228   | 0.118  |
|   | 6 | -0.024 | 0.012  | 8.61E-01 | -0.07    | 0.021  |
|   | 7 | -0.057 | 0.032  | 9.84E-01 | -0.209   | 0.094  |
|   | 8 | -0.042 | 0.023  | 9.80E-01 | -0.152   | 0.068  |
|   | 9 | -0.005 | 0.011  | 1.00E+00 | -0.048   | 0.037  |
|   | 6 | 1      | -0.04  | 0.033    | 1.00E+00 | -0.21  |
| 2 |   | -0.017 | 0.029  | 1.00E+00 | -0.153   | 0.119  |
| 3 |   | 0.007  | 0.013  | 1.00E+00 | -0.043   | 0.057  |
| 4 |   | -0.031 | 0.033  | 1.00E+00 | -0.204   | 0.142  |
| 5 |   | 0.024  | 0.012  | 8.61E-01 | -0.021   | 0.07   |
| 7 |   | -0.033 | 0.032  | 1.00E+00 | -0.185   | 0.118  |
| 8 |   | -0.018 | 0.023  | 1.00E+00 | -0.128   | 0.092  |
| 9 |   | 0.019  | 0.011  | 9.70E-01 | -0.023   | 0.061  |
| 7 |   | 1      | -0.007 | 0.044    | 1.00E+00 | -0.186 |
|   | 2 | 0.016  | 0.041  | 1.00E+00 | -0.148   | 0.18   |
|   | 3 | 0.04   | 0.032  | 1.00E+00 | -0.111   | 0.19   |
|   | 4 | 0.002  | 0.045  | 1.00E+00 | -0.178   | 0.183  |
|   | 5 | 0.057  | 0.032  | 9.84E-01 | -0.094   | 0.209  |
|   | 6 | 0.033  | 0.032  | 1.00E+00 | -0.118   | 0.185  |
|   | 8 | 0.015  | 0.037  | 1.00E+00 | -0.138   | 0.169  |
|   | 9 | 0.052  | 0.031  | 9.95E-01 | -0.1     | 0.205  |
|   | 8 | 1      | -0.023 | 0.038    | 1.00E+00 | -0.186 |

|   |   |        |       |          |        |       |
|---|---|--------|-------|----------|--------|-------|
|   | 2 | 0.001  | 0.035 | 1.00E+00 | -0.141 | 0.143 |
|   | 3 | 0.024  | 0.023 | 1.00E+00 | -0.084 | 0.133 |
|   | 4 | -0.013 | 0.039 | 1.00E+00 | -0.18  | 0.154 |
|   | 5 | 0.042  | 0.023 | 9.80E-01 | -0.068 | 0.152 |
|   | 6 | 0.018  | 0.023 | 1.00E+00 | -0.092 | 0.128 |
|   | 7 | -0.015 | 0.037 | 1.00E+00 | -0.169 | 0.138 |
|   | 9 | 0.037  | 0.022 | 9.96E-01 | -0.075 | 0.149 |
| 9 | 1 | -0.059 | 0.032 | 9.86E-01 | -0.23  | 0.112 |
|   | 2 | -0.036 | 0.028 | 1.00E+00 | -0.173 | 0.101 |
|   | 3 | -0.012 | 0.012 | 1.00E+00 | -0.06  | 0.035 |
|   | 4 | -0.05  | 0.033 | 9.99E-01 | -0.225 | 0.125 |
|   | 5 | 0.005  | 0.011 | 1.00E+00 | -0.037 | 0.048 |
|   | 6 | -0.019 | 0.011 | 9.70E-01 | -0.061 | 0.023 |
|   | 7 | -0.052 | 0.031 | 9.95E-01 | -0.205 | 0.1   |
|   | 8 | -0.037 | 0.022 | 9.96E-01 | -0.149 | 0.075 |

Significant level:  $p < 0.05$ .
